# Supplementary material for: Gut microbiota signatures in cystic fibrosis: Loss of host CFTR function drives the microbiota enterophenotype
Source: PLoS One. 2018 Dec 6;13(12):e0208171. doi: 10.1371/journal.pone.0208171 (PMC6283533; doi:10.1371/journal.pone.0208171)
Supplement: S4 Table — Genus 80% reduced. (XLS) [file pone.0208171.s009.xls]

## Sheet: Genus 80% reduced
	P-06-2	P-06-7	P-06-8	P-07-1	P-07-10	P-07-4	P-07-5	P-07-6	P-07-7	P-07-9	P-08-3	P-08-4	P-08-6	P-08-8	P-09-2	P-09-4	P-09-6	P-09-7	P-10-13	P-10-2	P-10-4	P-10-7	P-11-10	P-11-3	P-11-4	P-11-7	P-11-8	P-11-9	N-06-1	N-06-2	N-06-4	N-06-5	N-06-6	N-07-3	N-07-4	N-07-5	N-07-6	N-08-1	N-08-4	N-08-5	N-09-4	N-09-6	N-09-7	N-09-9	N-10-1	N-10-2	N-10-3	N-10-4	N-10-5
Actinomyces	0	0.000203998	0.00302618	0	0	0.00728316	0	0.00212475	0	0.00282636	0.00150625	0.00839416	0	0.000133815	0	0.0139113	0	0.00152587	0.000990099	0.000908403	0	0.00029577	0.00169038	0.000158428	0.00159051	0	0.00438799	0.00839006	0.000883392	0.00247066	0.00219815	0.000926048	0.00116482	0.000505945	0.003861	0.00572607	0.0023972	0.00450281	0.000971083	0.000940144	0.00389625	0.000667705	0.00341964	0	0	0.00591911	0.00120221	0.000790931	0.0010005
Bacteroides	0.0178838	0.000611995	0.0463005	0.271204	0.00757228	0.000220702	0.198314	0.0195781	0	0.000353294	0.111463	0.050365	0.0010304	0.496722	0.000877963	0.00564516	0.000282686	0.00291303	0	0.0534444	0.000300391	0.045943	0.00140865	0.000158428	0.000144592	0	0.000692841	0	0.00569297	0.001853	0.328466	0.00555629	0.00465929	0.0073362	0.107593	0	0.0981007	0.0011257	0.000647389	0.115324	0.0099076	0.00890274	0.00024426	0.0757752	0.0493577	0.00559027	0.0016831	0.0624835	0.00225113
Bifidobacterium	0	0.000203998	0.000302618	0.000234302	0	0	0	0.000303536	0	0	0	0	0.00193199	0.000401445	0	0.00100806	0	0	0	0	0	0.0687173	0	0.0141001	0	0	0	0.000158303	0.00314095	0.000617665	0.00219815	0.000661463	0.000582411	0	0	0.0636738	0.001844	0.000562852	0.000323694	0.000156691	0.0172548	0.00534164	0.0180752	0.0153101	0	0.0325551	0.0096177	0.0018455	0.0155078
Blautia	0.0316692	0.000407997	0.088213	0.173266	0.0130794	0.00441404	0.0190506	0.0506905	0.00136846	0.730613	0.136918	0.00364964	0.00669758	0.0168607	0.00687738	0.00221774	0.0812721	0.0258011	0.0133663	0.00711582	0	0.0971113	0.00915622	0.000316857	0	0.014553	0	0.00110812	0.17923	0.00967676	0.0175852	0.12118	0.108328	0.0511004	0.257143	0.0226752	0.035036	0.0204503	0.0781183	0.0224068	0.0844929	0.0478522	0.0994138	0.230039	0.00540906	0.000657678	0.077182	0.168996	0.0327664
Clostridiaceae	0.00558867	0.0226438	0	0.00140581	0	0.138601	0.00249844	0.00273183	0.212111	0.000176647	0.00316313	0.000364964	0.00875837	0.000669075	0.341528	0.171774	0.000565371	0.014149	0	0.0257381	0.820366	0.00473233	0.00140865	0.00126743	0.494361	0.010395	0.463741	0.00237454	0.0138398	0.00514721	0.000785053	0.00436566	0	0.00379459	0.0010296	0.00251947	0.0014752	0.000938086	0.00248166	0	0.000222643	0.00111284	0.00073278	0.00968992	0.000338066	0.000328839	0.00456841	0.00448194	0.002001
Clostridium	0.0748882	0.00611995	0.428809	0.0426429	0.043598	0.124255	0.0302936	0.0265594	0.0136846	0.00158983	0.119596	0.0167883	0.125708	0.0260939	0.398303	0.229435	0.000848057	0.0233042	0.00990099	0.111734	0.0153199	0.0543232	0.266657	0.278834	0.450694	0.295218	0.440878	0.00221624	0.100707	0.110356	0.014602	0.0534462	0.365172	0.0566658	0.0733591	0.0719194	0.0685967	0.0424015	0.305028	0.0343153	0.269064	0.430892	0.0173425	0.080814	0.00540906	0.291023	0.247656	0.0677564	0.343672
Collinsella	0.00633383	0.000203998	0.0673324	0	0	0.000441404	0.00281074	0.046441	0.000342114	0.0372726	0.0536225	0.000912409	0.000257599	0.0152549	0.147351	0	0	0.000416146	0	0	0	0.00246475	0.127342	0	0.00101215	0.0644491	0	0.000158303	0.0557519	0.0286185	0.00439629	0.112713	0.0407688	0.0941057	0.0195624	0.141548	0	0.0470919	0.0420803	0.0513945	0.000556607	0	0.00219834	0	0	0	0.0411157	0.189296	0
Coprococcus	0.0152757	0.000611995	0.0679377	0.00726336	0.0172097	0.00331053	0.00905684	0.00166945	0.0947657	0.00105988	0.0857057	0.000729927	0.00914477	0.00080289	0.00629207	0.000201613	0.0734982	0.013178	0.00148515	0.0001514	0.000300391	0.0511683	0.000845189	0	0.000144592	0.002079	0	0.000949818	0.0647821	0.014824	0.00926362	0.104379	0.0209668	0.0227675	0.0172458	0.0506184	0.0125392	0.00206379	0.180621	0.0307114	0.123789	0.121745	0.00073278	0.0135659	0.00642326	0	0.0507333	0.0187187	0.0887944
Corynebacterium	0	0.000407997	0.000756544	0	0.000229463	0.00308983	0	0.000151768	0	0	0.000150625	0.000182482	0.000386399	0.000401445	0.000146327	0.000201613	0.000141343	0.000693577	0	0.0010598	0	0.000591541	0	0	0	0	0	0	0	0	0.000157011	0.000264585	0.000582411	0	0.0015444	0	0	0	0.000323694	0.000313381	0.00823778	0	0.00268686	0.000193798	0	0.00591911	0	0.000790931	0.002001
Eggerthella	0.000372578	0.000407997	0.000453926	0.010895	0.0360257	0.000220702	0.000312305	0.00121414	0.00102634	0	0.00391625	0.000547445	0	0.000669075	0.00146327	0.000403226	0	0.00166459	0	0.0013626	0	0.000394361	0.00352162	0	0.000289184	0.004158	0	0.000158303	0.00245387	0.0193535	0.00157011	0.0136261	0.0145603	0.00101189	0.0020592	0.0300046	0.011986	0.0230769	0.00841606	0.124099	0.0666815	0.0260405	0.0451881	0.05	0.000338066	0.0213745	0.0264487	0.026628	0.00725363
Enterobacter	0.000372578	0.000815993	0.00620366	0.00164011	0	0.0161112	0	0.00242829	0	0	0.00150625	0	0.00218959	0.00468353	0	0	0.0029682	0.00221945	0.00148515	0.00560182	0	0.00532387	0.00408508	0.015526	0	0.010395	0	0.000316606	9.81547e-05	0.00329421	0.00329722	0	0.00116482	0.00227675	0	0.0032066	0.0038724	0.020075	0	0.000626763	0.00144718	0	0	0.000387597	0.0111562	0	0	0	0
Enterobacteriaceae	0.0428465	0.0220318	0.137086	0.0750937	0	0.121386	0.00281074	0.0532706	0	0	0.00135563	0.000182482	0.0467543	0.0279673	0.0048288	0	0.0195053	0.00332917	0.0299505	0.013626	0	0.0389431	0.0138048	0.286755	0.000144592	0.135135	0.00115473	0.0750356	0.00294464	0.00823554	0.0493013	0.000396878	0.00232964	0.0834809	0.0020592	0.000229043	0.0361424	0.000187617	0.000323694	0.0155124	0.0184793	0	0.00073278	0.00271318	0.0212982	0.00263071	0.00144265	0.00395465	0
Enterococcus	0.00223547	0.000815993	0.000302618	0.200445	0	0.0238358	0.647408	0.00182122	0	0.000529942	0.00241	0.490328	0.0001288	0.00053526	0.000292654	0.404839	0.298799	0.038008	0.00259901	0.0148372	0.000600781	0.00335207	0.0204254	0.298479	0.01952	0.010395	0.00600462	0.0400507	0	0.00144122	0	0.00224897	0	0.0295978	0	0.00824553	0.0001844	0	0.00226586	0	0.00256039	0.000222568	0.445286	0.00290698	0.000338066	0.199277	0.0113008	0.298708	0.0010005
Erysipelotrichaceae	0.000745156	0	0.00151309	0.0152296	0	0	0.00780762	0.00075884	0	0.000176647	0.000150625	0.000547445	0	0.00080289	0.000146327	0.00262097	0.00522968	0.00374532	0.0106436	0.0124148	0.00150195	0.00808439	0.00577546	0.000158428	0.000289184	0.004158	0.00115473	0.000158303	9.81547e-05	0.000411777	0.000471032	0.000132293	0.000582411	0	0.000514801	0.000229043	0.0011064	0	0	0.000156691	0.0109095	0	0.00268686	0.00116279	0	0.0111805	0.00096177	0.00210915	0.00225113
Escherichia	0.169523	0.284578	0.00181571	0.00117151	0	0.0282498	0	0.329489	0	0.000883236	0.0631119	0.000364964	0.00656878	0.000133815	0	0.000403226	0.428551	0.120128	0.503342	0.473581	0	0.000788721	0.175377	0.00158428	0	0.002079	0	0.0242204	0	0.00123533	0.00157011	0	0.012813	0.00126486	0.0010296	0.00274851	0.0023972	0.0170732	0	0.000783453	0.000333964	0.000667705	0.00024426	0.00271318	0.740365	0	0.000240442	0.00131822	0
Eubacterium	0	0.000203998	0.000453926	0.000234302	0.00206517	0.000441404	0	0.00349067	0	0	0.00286188	0	0.0001288	0.00080289	0	0	0	0.000416146	0	0	0	0.00325348	0.000422595	0	0.000144592	0	0.000923788	0	0.0179623	0.00452954	0.00235516	0.0111126	0.00698893	0.00961295	0.00823681	0.00687128	0.000553199	0.0043152	0.00388433	0.00219367	0.00122454	0.00934787	0.00097704	0.00736434	0	0	0.0257273	0.0145004	0.00575288
Faecalibacterium	0.0223547	0.00101999	0	0.000234302	0.0853603	0.000220702	0.000312305	0.00151768	0	0	0.0006025	0.000364964	0.262107	0.0943396	0.0194615	0.000201613	0	0.00152587	0.000123762	0	0	0.014197	0.00056346	0.000792142	0	0	0.000461894	0	0.0267962	0.0912086	0.0472602	0.0190501	0.0157251	0.0301037	0.0290862	0.00526798	0.220542	0.0129456	0.00356064	0.140865	0.018368	0.0358335	0.00708354	0.225388	0.00371873	0.0187438	0.00456841	0.000263644	0.0302651
Dorea	0	0	0	0.000117151	0.00596604	0.000662105	0	0	0	0	0	0	0	0	0	0	0	0	0	0	0	0	0	0	0	0	0	0	0.0265018	0.00452954	0.00125608	0.0156105	0.019802	0.0118897	0.0033462	0.0201557	0.0022128	0.00487805	0.0157531	0.000313381	0.00166982	0.032495	0.00024426	0.000387597	0	0	0.0151479	0.00975481	0.0165083
Dialister	0.0357675	0	0	0	0.0130794	0	0	0.00349067	0	0	0.000150625	0	0	0.000401445	0	0	0	0.000693577	0.000123762	0	0	0.00236616	0	0	0	0	0	0.000158303	0	0.0448837	0.00942063	0.000264585	0.0180547	0.000252972	0.00952381	0.0222171	0.0855615	0.110694	0	0.24005	0.000111321	0	0.0207621	0.0476744	0.0280595	0	0.00336619	0	0.00750375
Gemella	0	0	0	0.000117151	0	0.000662105	0	0.00075884	0	0	0.000753125	0	0	0	0.000146327	0	0	0	0.000123762	0.000605602	0	0.000788721	0.00295816	0	0	0	0.000923788	0.000316606	0.000196309	0.00267655	0.000785053	0.000529171	0.00116482	0	0.000772201	0.00091617	0.0003688	0.00375235	0.000647389	0.000470072	0.00389625	0	0.00024426	0.0137597	0.000338066	0.000657678	0.000240442	0	0.00050025
Granulicatella	0.00149031	0	0.000302618	0	0	0.00617965	0.000312305	0.000303536	0.000684229	0	0.000753125	0.00145985	0.000772798	0	0.000292654	0.000604839	0	0.00374532	0.000618812	0.000454201	0.00210273	0.000591541	0.00183124	0	0	0	0.000230947	0.000949818	0.000883392	0.000617665	0.000157011	0.000264585	0.000582411	0.000505945	0.000772201	0.000229043	0.0014752	0.0101313	0.00161847	0.000470072	0.00211511	0.00155798	0.00048852	0.00174419	0	0.0016442	0.000240442	0.00131822	0.000250125
Lachnospiraceae	0.00298063	0	0.0314722	0.0115979	0.00734282	0.00176561	0.00312305	0.00136591	0.000342114	0.0291468	0.0305769	0	0.000901597	0.00655694	0.00497512	0	0.0171025	0.0018033	0.00173267	0.0013626	0.00120156	0.00867593	0.0101423	0.000316857	0	0.022869	0	0.000474909	0.0366117	0.00514721	0.015544	0.0404815	0.012813	0.0381988	0.104247	0.00870362	0.0125392	0	0.0531938	0.0275776	0.0115774	0.0204763	0.0036639	0.0180233	0.000338066	0.0138112	0.0182736	0.00764566	0.0327664
Lactobacillus	0.00111773	0.644023	0.000907853	0	0.000229463	0.0105937	0	0.00273183	0.0177899	0.000353294	0.00813376	0.00529197	0.27151	0.00147197	0.000877963	0	0.000141343	0.000138715	0.00222772	0.000605602	0	0.000985902	0.00338076	0	0	0.002079	0	0.0343517	0	0.00102944	0.000471032	0.0089959	0.000582411	0	0	0	0.0003688	0.00281426	0.000755287	0	0.000222643	0	0	0	0	0	0.0016831	0	0
Propionibacterium	0.00111773	0.000203998	0.00181571	0	0.000229463	0.00242772	0.00062461	0.00349067	0.00136846	0.000176647	0.015665	0.025	0.0159711	0.00508497	0.000438982	0.0122984	0	0.00762935	0.00148515	0.0001514	0	0.0234645	0.00183124	0.000158428	0.000144592	0.002079	0.00207852	0.000158303	0	0.000617665	0	0	0	0	0.0002574	0.00091617	0.000553199	0.0011257	0.000431593	0.000470072	0.00077925	0	0.00048852	0.000968992	0	0.000657678	0.000480885	0.00131822	0
Roseburia	0.00111773	0	0.00408534	0.000234302	0.0220285	0.000882807	0.00062461	0.000151768	0	0.0627098	0.000150625	0	0.000386399	0.0107052	0.0016096	0	0.000141343	0	0	0	0	0.0605344	0	0	0	0	0.000230947	0.000158303	0.0365135	0.0035001	0.0174282	0.0124355	0.11357	0.0344042	0.00643501	0.00549702	0.0029504	0.00206379	0.102935	0.00626763	0.0099076	0.00734476	0	0.000775194	0.0020284	0	0.0016831	0.000527287	0.0145073
Ruminococcaceae	0.0916542	0.000203998	0.0114995	0.0550609	0.0885727	0.00110351	0.000312305	0.0136591	0	0	0.00979063	0.000729927	0.0011592	0.0218119	0.00673105	0.00564516	0	0.000971008	0	0	0.0126164	0.0335207	0.00056346	0	0	0.002079	0	0.000158303	0.130938	0.0706197	0.0686136	0.0349253	0.0122306	0.216291	0.003861	0.0235914	0.0717315	0.00412758	0.00485542	0.0034472	0.006234	0.0153572	0.00512946	0.0372093	0.00676133	0.00131536	0.00480885	0.000263644	0.0765383
Ruminococcus	0.0283159	0	0.00650628	0.0622071	0.000688389	0.000220702	0.0437227	0.00121414	0.00171057	0.0178414	0.00738063	0.0644161	0.00231839	0.0186003	0.0108282	0.00302419	0.00240283	0.00166459	0.000618812	0.0010598	0.118053	0.0515627	0.00549373	0.00348542	0.021978	0.0540541	0.00230947	0.000158303	0.0496663	0.0102944	0.0285759	0.086784	0.102504	0.0683026	0.111197	0.132616	0.0785543	0.0166979	0.113293	0.0242871	0.0487588	0.0554195	0.00439668	0.0232558	0.0192698	0.317659	0.370762	0.0308463	0.185593
Streptococcus	0.00633383	0.00122399	0.0304131	0.0126523	0.0151446	0.398367	0.0146783	0.0182122	0.00752651	0.111994	0.0495557	0.182664	0.0200927	0.0401445	0.022827	0.121573	0.0619081	0.00430018	0.414604	0.257078	0.0243316	0.0395347	0.305677	0.00158428	0.00390399	0.324324	0.0602771	0.784708	0.0819592	0.290714	0.0811744	0.126604	0.0110658	0.0900582	0.0795367	0.0616125	0.0499723	0.382739	0.029672	0.00219367	0.137593	0.0320499	0.017831	0.00968992	0.0010142	0.0430779	0.0100986	0.0677564	0.0232616
Turicibacteraceae	0	0.00673195	0	0.000585754	0	0	0.0109307	0.000303536	0.000684229	0	0	0.000364964	0.0240855	0	0.00848698	0	0	0.0195589	0	0.00227101	0	0	0.000140865	0.000633714	0.00101215	0	0	0.000158303	0	0.00741198	0.000471032	0.000529171	0.000582411	0.000505945	0.0015444	0.00183234	0.0014752	0.0054409	0.000863185	0	0.000222643	0.000890274	0	0.000193798	0.000338066	0	0.00096177	0.00369101	0
Veillonella	0.00447094	0.00203998	0.00332879	0.00292877	0	0.0551755	0.000312305	0.00136591	0.62949	0	0.00195813	0.000729927	0.0211231	0.0559347	0	0.00120968	0.00141343	0	0	0.000908403	0.000901172	0.0811397	0.000986054	0.00887199	0.000144592	0	0.00461894	0.010448	0	0.000205888	0.000471032	0.00158751	0	0	0.0023166	0	0.0001844	0.000938086	0.000215796	0.000313381	0.000333964	0.000222568	0	0.00503876	0.00980392	0.000328839	0	0.000263644	0.000750375
Others	0.00707899	0.00305998	0.0016644	0.0175726	0.0220285	0.0331053	0.00218613	0.0130521	0.0164215	0	0.0137069	0.00109489	0.00965997	0.0127124	0.00453614	0.00685484	0.0019788	0.00166459	0.00160891	0.010598	0.00180234	0.042098	0.00549373	0.0779468	0.00404858	0.00831601	0.00438799	0.000316606	0.039949	0.0393247	0.0425499	0.0656171	0.0448457	0.0564129	0.0656371	0.148878	0.154896	0.0624765	0.0113293	0.0968348	0.0282756	0.030937	0.0283341	0.0317829	0.0635565	0.0177573	0.0156288	0.0100185	0.0305153
[truncated: 10 more columns]
