# Supplementary material for: Gut microbiota signatures in cystic fibrosis: Loss of host CFTR function drives the microbiota enterophenotype
Source: PLoS One. 2018 Dec 6;13(12):e0208171. doi: 10.1371/journal.pone.0208171 (PMC6283533; doi:10.1371/journal.pone.0208171)
Supplement: S5 Fig — (DOC) [file pone.0208171.s005.doc]

**S5 Fig.**

**
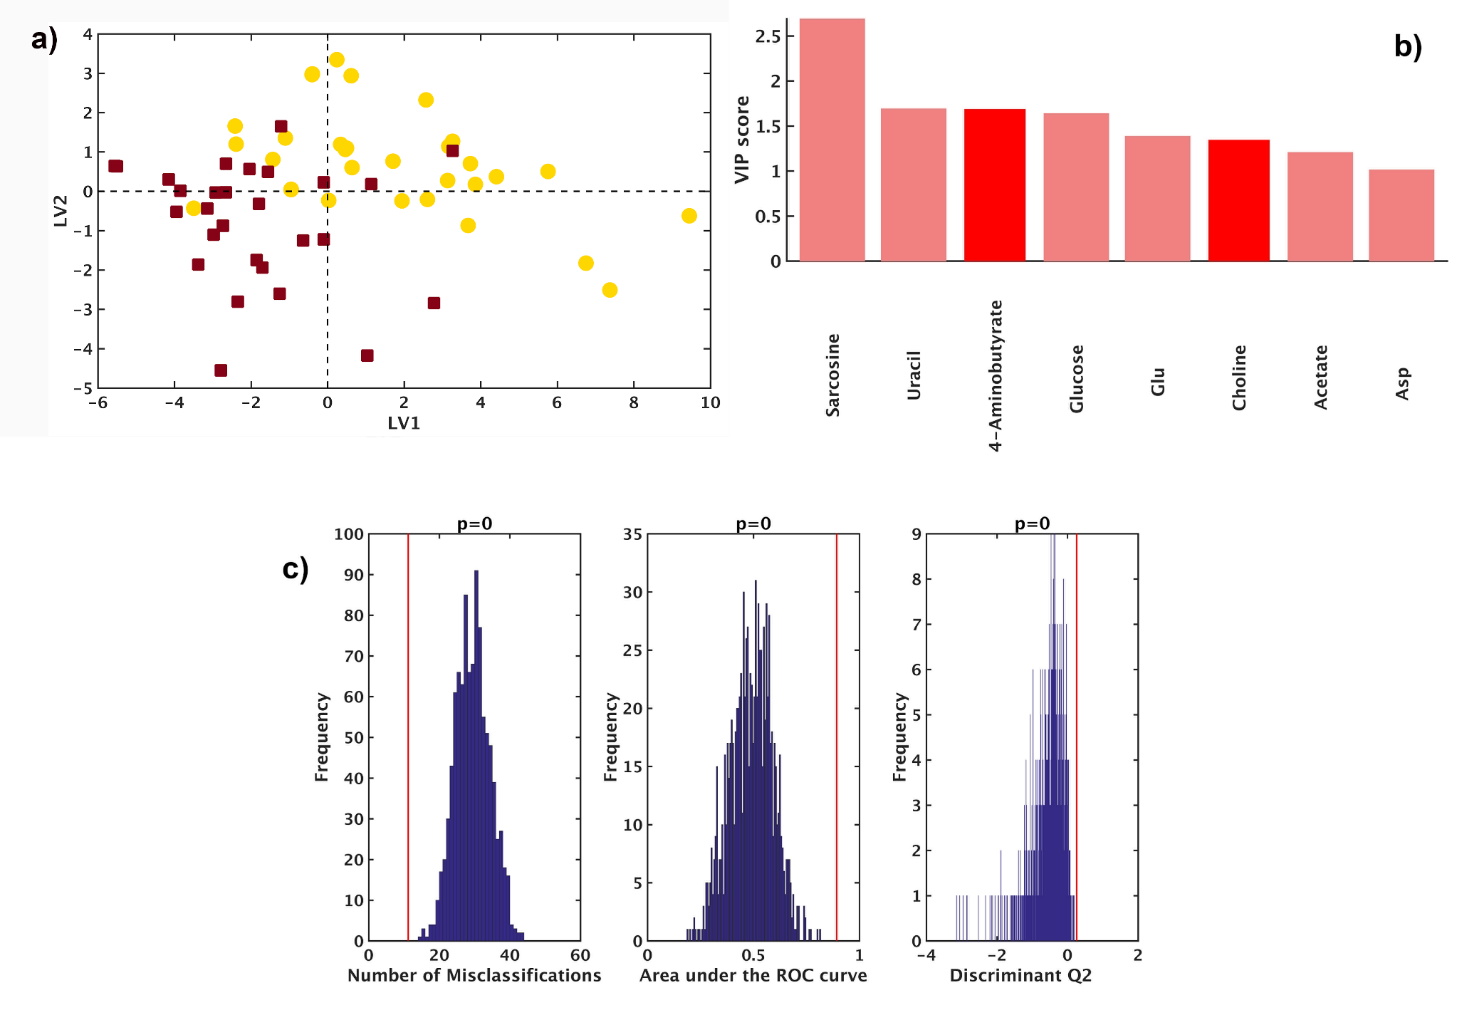
**

**S5 Fig.**

**Title.** ***PLS-DA results based on 1H NMR analysis***.

**Legend**. **Panel A.** Plot of LV scores: yellow, HC; dark red, CF patients. **Panel B**. Histograms representing VIP values: pale red, low levels; dark red, high levels (in CF patients). **Panel C.** Figures of merit relative to NMC, AUROC, and DQ2.
