# Supplementary material for: Gut microbiota signatures in cystic fibrosis: Loss of host CFTR function drives the microbiota enterophenotype
Source: PLoS One. 2018 Dec 6;13(12):e0208171. doi: 10.1371/journal.pone.0208171 (PMC6283533; doi:10.1371/journal.pone.0208171)
Supplement: S7 Table — (XLS) [file pone.0208171.s012.xls]

## Sheet: VOCSs
ALCOHOLS	Total CF	Total HC	Mean CF	Mean HC	p Value without correction	FDR-adjuasted p value	IQR CF range	IQR HC range	Detected CF (n/28)	Detected HC (n/31)
1-Butanol	1710.1312	2126.095	61.0761	68.5837	0.77155	0.87047	7.19-96.36	0.00-88.77	23	22
1-Butoxy-2-propanol	49.4449	2.4534	1.7659	0.079142	0.94211	0.95833	0.00-0.00	0.00-0.00	1	1
1-Heptanol	6.1938	151.5089	0.22121	4.8874	0.04708	0.34525	0.00-0.00	0.00-1.75	2	8
1-Hexanol	314.1963	429.3396	11.2213	13.8497	0.5471	0.70801	3.17-12.53	2.45-12.86	22	25
1-Methoxy-2-butanol	0	16.3227	0	0.52654	0.097998	0.42394	0.00-0.00	0.00-0.00	0	3
1-Octanol	17.0279	426.7569	0.60814	13.7664	0.0064161	0.094103	0.00-0.00	0.00-6.60	1	10
1-Octen-3-ol	89.3992	69.9848	3.1928	2.2576	0.85828	0.94411	0.00-1.64	0.00-1.11	7	8
1-Octene	19.3967	0	0.69274	0	0.13978	0.42394	0.00-0.00	0.00-0.00	2	0
1-Pentanol	668.7623	344.4168	23.8844	11.1102	0.52532	0.70043	0.00-33.57	1.53-14.73	20	24
1-Propanol	992.068	328.5843	35.431	10.5995	0.00010742	0.0047264	12.05-47.60	0.00-7.49	23	13
2,3-Butanediol	0	86.576	0	2.7928	0.18307	0.42394	0.00-0.00	0.00-0.00	0	2
2,6-dimethyl-4-heptanol	4.8642	0.55232	0.17372	0.017817	0.94211	0.95833	0.00-0.00	0.00-0.00	1	1
2-Butanol	8.1208	9.6683	0.29003	0.31188	0.95833	0.95833	0.00-0.00	0.00-0.00	2	2
2-Dodecanol	0	7.4666	0	0.24086	0.18307	0.42394	0.00-0.00	0.00-0.00	0	2
2-Ethyl-1-hexanol	1011.5913	1258.3282	36.1283	40.5912	0.013675	0.15042	0.00-31.76	0.00-4.13	16	8
2-Heptanol	48.7717	5.0834	1.7418	0.16398	0.15201	0.42394	0.00-0.00	0.00-0.00	5	2
2-Hexanol	13.814	37.261	0.49336	1.202	0.05778	0.36319	0.00-1.14	0.00-2.62	8	14
2-methyl 1-propanol	12.8193	20.0551	0.45783	0.64694	0.39349	0.5585	0.00-0.00	0.00-0.00	1	3
2-Methyl-2-butanol	0	6.9306	0	0.22357	0.18307	0.42394	0.00-0.00	0.00-0.00	0	2
2-Methyl-2-octanol	0	147.5588	0	4.76	0.35944	0.52717	0.00-0.00	0.00-0.00	0	1
2-Methyl-3-pentanol	27.4645	17.4162	0.98087	0.56181	0.93061	0.95833	0.00-0.00	0.00-0.00	2	2
2-Methyl-6-hepten-1-ol	5.9718	0	0.21328	0	0.30855	0.52717	0.00-0.00	0.00-0.00	1	0
2-Methylcyclopentanol	0	4.6216	0	0.14908	0.35944	0.52717	0.00-0.00	0.00-0.00	0	1
2-Nonanol	26.9873	26.767	0.96383	0.86345	0.58343	0.73346	0.00-0.00	0.00-0.00	3	5
2-Octanol	2.4286	50.8449	0.086736	1.6402	0.033192	0.29209	0.00-0.00	0.00-0.00	1	7
2-Pentanol	24.4751	20.7879	0.87411	0.67058	0.7653	0.87047	0.00-0.00	0.00-0.00	2	3
2-Phenoxyethanol	0	724.8468	0	23.3822	0.35944	0.52717	0.00-0.00	0.00-0.00	0	1
2-Propanol	20.1442	0	0.71944	0	0.30855	0.52717	0.00-0.00	0.00-0.00	1	0
2-Undecanol	0	22.1606	0	0.71486	0.18307	0.42394	0.00-0.00	0.00-0.00	0	2
3,4-Dimethyl-1-pentanol	0	12.8896	0	0.41579	0.35944	0.52717	0.00-0.00	0.00-0.00	0	1
3-Buten-1-ol	17.5648	8.4513	0.62731	0.27262	0.66097	0.78602	0.00-0.00	0.00-0.00	1	2
3-Heptanol	17.9246	22.4009	0.64017	0.72261	0.60086	0.73438	0.00-0.00	0.00-0.20	5	8
3-Methyl-2-butanol	0	1.6635	0	0.053662	0.35944	0.52717	0.00-0.00	0.00-0.00	0	1
3-Methyl-3-buten-1-ol	11.4819	100.1202	0.41007	3.2297	0.078363	0.42394	0.00-0.00	0.00-3.11	4	10
4-Methoxy-1-butanol	0	10.7343	0	0.34627	0.18307	0.42394	0.00-0.00	0.00-0.00	0	2
4-Methyl-3-hexanol	0	19.1667	0	0.61828	0.18307	0.42394	0.00-0.00	0.00-0.00	0	2
5-Methyl-2-heptanol	5.502	0	0.1965	0	0.30855	0.52717	0.00-0.00	0.00-0.00	1	0
Benzyl alcohol	0	44.15	0	1.4242	0.18307	0.42394	0.00-0.00	0.00-0.00	0	2
Decanol	0	8.1811	0	0.26391	0.35944	0.52717	0.00-0.00	0.00-0.00	0	1
Ethanol	2620.3048	1075.4195	93.5823	34.691	0.0014337	0.031541	35.79-156.50	1.40-42.12	26	23
Iso amyl alcohol	247.8358	49.2494	8.8513	1.5887	0.1536	0.42394	0.00-5.50	0.00-1.41	11	8
Nonanol	0	40.0333	0	1.2914	0.35944	0.52717	0.00-0.00	0.00-0.00	0	1
Phenylethyl alcohol	403.5922	602.9274	14.414	19.4493	0.43648	0.60015	0.00-23.25	0.00-11.39	13	14
Tridecanol	0	8.1002	0	0.2613	0.35944	0.52717	0.00-0.00	0.00-0.00	0	1
ALKANES	Total CF	Total HC	Mean CF	Mean HC	p Value without correction	FDR-adjuasted p value	IQR CF range	IQR HC range	Detected CF (n/28)	Detected HC (n/31)
2,3-Dimethylpentane	0	8.3689	0	0.26996	0.35944	0.35944	0.00-0.00	0.00-0.00	0	1
2,4-Dimethylpentane	9.292	0	0.33186	0	0.30855	0.35944	0.00-0.00	0.00-0.00	1	0
2-Methyloctane	6.7844	0	0.2423	0	0.30855	0.35944	0.00-0.00	0.00-0.00	1	0
3,7-dimethyl decane	11.5218	0	0.41149	0	0.30855	0.35944	0.00-0.00	0.00-0.00	1	0
3,8-Dimethyl decane	4.054	0	0.14479	0	0.30855	0.35944	0.00-0.00	0.00-0.00	1	0
Dodecane	143.8027	5.8653	5.1358	0.1892	0.0073394	0.051376	0.00-10.13	0.00-0.00	9	2
heptane	0	11.5177	0	0.37154	0.18307	0.35944	0.00-0.00	0.00-0.00	0	2
Hexadecane	333.3174	0	11.9042	0	0.015536	0.072503	0.00-0.00	0.00-0.00	5	0
Octadecane	35.0266	0	1.251	0	0.30855	0.35944	0.00-0.00	0.00-0.00	1	0
Octane	0	4.6375	0	0.1496	0.35944	0.35944	0.00-0.00	0.00-0.00	0	1
Pentadecane	96.6365	13.1533	3.4513	0.4243	0.14443	0.33701	0.00-0.00	0.00-0.00	5	2
Tetradecane	159.4458	19.1624	5.6945	0.61814	0.0023195	0.032473	0.00-5.94	0.00-0.00	14	5
Tridecane	63.7622	9.3547	2.2772	0.30176	0.056102	0.18661	0.00-1.59	0.00-0.00	8	3
Undecane	28.4466	0	1.016	0	0.066646	0.18661	0.00-0.00	0.00-0.00	3	0
KETONES	Total CF	Total HC	Mean CF	Mean HC	p Value without correction	FDR-adjuasted p value	IQR CF range	IQR HC range	Detected CF (n/28)	Detected HC (n/31)
2,3- Octanedione	14.9188	0	0.53281	0	0.13978	0.53058	0.00-0.00	0.00-0.00	2	0
2,3-Butanedione	1088.5247	912.6262	38.8759	29.4396	0.54841	0.60275	0.00-63.64	0.87-42.05	14	23
2,3-Pentanedione	458.2186	584.887	16.365	18.8673	0.026068	0.31123	0.00-0.00	0.00-21.06	4	14
2,4- Octanedione	0	4.2246	0	0.13628	0.35944	0.58965	0.00-0.00	0.00-0.00	0	1
2,4-Heptanedione	49.9384	26.2792	1.7835	0.84772	0.56118	0.60275	0.00-0.00	0.00-0.00	4	3
2,4-Pentanedione	93.8416	17.2103	3.3515	0.55517	0.08784	0.50947	0.00-3.33	0.00-0.00	7	3
2,6-Dimethyl 4 heptanone	603.8021	484.3205	21.5644	15.6232	0.20126	0.53058	14.14-30.50	0.00-26.69	23	21
2-Butanone	328.6225	341.7919	11.7365	11.0255	0.19306	0.53058	0.00-11.33	0.00-18.07	11	19
2-Decanone	8.3304	11.9206	0.29752	0.38454	0.63233	0.65491	0.00-0.00	0.00-0.00	1	2
2-Heptanone	94.324	194.4995	3.3687	6.2742	0.45419	0.58965	0.00-0.00	0.00-0.00	4	7
2-hexanone	55.6823	139.7034	1.9887	4.5066	0.4148	0.58965	0.00-0.00	0.00-0.00	4	7
2-Nonanone	85.9199	69.6409	3.0686	2.2465	0.46765	0.58965	0.00-4.17	0.00-2.27	15	17
2-Octanone	35.3201	99.0679	1.2614	3.1957	0.37149	0.58965	0.00-0.78	0.00-0.00	7	4
2-Pentanone	255.5169	741.9306	9.1256	23.9332	0.0011866	0.03441	0.00-0.00	0.00-26.71	6	22
2-Tridecanone	1.5096	0	0.053913	0	0.30855	0.58965	0.00-0.00	0.00-0.00	1	0
2-Undecanone	110.2763	127.0808	3.9384	4.0994	0.05084	0.36859	0.00-0.00	0.00-6.57	5	15
3-hexanone	53.9764	78.2552	1.9277	2.5244	0.42334	0.58965	0.00-0.00	0.00-0.00	3	6
3-Hydroxy-2-butanone /Acetoin	544.3287	318.7342	19.4403	10.2817	0.4463	0.58965	0.00-25.83	0.00-7.85	13	14
3-Methyl-2-pentanone	0	19.4829	0	0.62848	0.18307	0.53058	0.00-0.00	0.00-0.00	0	2
3-Methyl-3-buten-2-one	31.8398	9.7389	1.1371	0.31416	0.15278	0.53058	0.00-0.00	0.00-0.00	4	1
4-Hexen-3-one	0	7.7635	0	0.25044	0.35944	0.58965	0.00-0.00	0.00-0.00	0	1
4-methyl-2-pentanone	1134.3162	1785.2354	40.5113	57.5882	0.28126	0.58965	0.00-67.71	0.00-118.60	14	18
5-Methoxy-2-pentanone	0	3.1	0	0.099999	0.35944	0.58965	0.00-0.00	0.00-0.00	0	1
5-Methyl-2-heptanone	58.4295	59.7216	2.0868	1.9265	0.22617	0.54658	0.00-0.00	0.00-2.71	5	10
5-Methyl-2-hexanone	0	4.7641	0	0.15368	0.18307	0.53058	0.00-0.00	0.00-0.00	0	2
6-Methyl-2,4-heptanedione	75.0583	0	2.6807	0	0.032196	0.31123	0.00-0.00	0.00-0.00	4	0
6-Methyl-2-heptanone	23.9871	24.6419	0.85668	0.7949	0.53658	0.60275	0.00-0.00	0.00-0.00	2	1
6-Methyl-5-hepten-2-one	594.4031	507.5347	21.2287	16.3721	0.49861	0.60249	5.99-26.21	4.82-22.53	22	28
Acetone	960.2419	1276.6987	34.2944	41.1838	0.84491	0.84491	0.00-54.77	0.00-34.42	15	21
ESTERS	Total CF	Total HC	Mean CF	Mean HC	p Value without correction	FDR-adjuasted p value	IQR CF range	IQR HC range	Detected CF (n/28)	Detected HC (n/31)
2-Ethylthiophene	15.1306	5.9528	0.54038	0.19202	0.30429	0.3963	0.00-0.00	0.00-0.00	4	2
2-Methyl butyl propanoate	11.4126	0	0.40759	0	0.30855	0.3963	0.00-0.00	0.00-0.00	1	0
3-Methyl butyl hexanoate	18.4542	0	0.65908	0	0.30855	0.3963	0.00-0.00	0.00-0.00	1	0
3-methyl ethyl butanoate	7.2532	0	0.25904	0	0.30855	0.3963	0.00-0.00	0.00-0.00	1	0
3-Methylbutyl butyrate	55.4697	0	1.9811	0	0.032196	0.13844	0.00-0.00	0.00-0.00	4	0
Amyl acetate	15.1107	0	0.53967	0	0.30855	0.3963	0.00-0.00	0.00-0.00	1	0
Amyl butyrate	21.5776	0	0.77063	0	0.30855	0.3963	0.00-0.00	0.00-0.00	1	0
Butyl acetate	332.3045	957.9336	11.868	30.9011	0.78482	0.82311	0.00-17.05	0.00-11.46	15	16
Butyl butanoate	977.9593	74.4221	34.9271	2.4007	0.27836	0.3963	0.00-0.00	0.00-0.00	5	3
Butyl hexanoate	122.8379	0	4.3871	0	0.066646	0.23881	0.00-0.00	0.00-0.00	3	0
Butyl isovalerate	7.7239	0	0.27585	0	0.30855	0.3963	0.00-0.00	0.00-0.00	1	0
Butyl propanoate	118.9456	0	4.2481	0	0.032196	0.13844	0.00-0.00	0.00-0.00	4	0
Butyl-2-methylbutyrate	83.982	0	2.9994	0	0.066646	0.23881	0.00-0.00	0.00-0.00	3	0
Ethyl acetate	292.1652	62.1044	10.4345	2.0034	0.028806	0.13844	0.00-18.81	0.00-0.00	12	7
Ethyl butyrate	263.231	8.6699	9.4011	0.27968	0.016235	0.13844	0.00-10.29	0.00-0.00	8	2
Ethyl decanoate	220.5351	1.5943	7.8763	0.051428	0.11983	0.37566	0.00-0.00	0.00-0.00	4	1
Ethyl dodecanoate	217.2465	0	7.7588	0	0.13978	0.37566	0.00-0.00	0.00-0.00	2	0
Ethyl hexanoate	22.3815	0	0.79934	0	0.30855	0.3963	0.00-0.00	0.00-0.00	1	0
Ethyl octanoate	93.0909	0	3.3247	0	0.032196	0.13844	0.00-0.00	0.00-0.00	4	0
Ethyl pentanoate	0	12.1065	0	0.39053	0.35944	0.3963	0.00-0.00	0.00-0.00	0	1
Ethyl propionate	50.023	0	1.7865	0	0.032196	0.13844	0.00-0.00	0.00-0.00	4	0
Ethyl-2-methylbutanoate	6.0157	0	0.21485	0	0.30855	0.3963	0.00-0.00	0.00-0.00	1	0
Hexyl hexanoate	28.502	0	1.0179	0	0.30855	0.3963	0.00-0.00	0.00-0.00	1	0
Hexyl n-valerate	26.1136	19.7735	0.93263	0.63786	0.51062	0.54892	0.00-0.00	0.00-0.00	2	1
Isoamyl butyrate	93.8085	3.3138	3.3503	0.1069	0.24331	0.3963	0.00-0.00	0.00-0.00	3	1
Isobutyl butyrate	26.8309	0	0.95824	0	0.30855	0.3963	0.00-0.00	0.00-0.00	1	0
Isopropyl butanoate	0	5.0145	0	0.16176	0.35944	0.3963	0.00-0.00	0.00-0.00	0	1
Isoprpyl myristate	0	1445.9157	0	46.6424	0.18307	0.3963	0.00-0.00	0.00-0.00	0	2
Linalylacetate	0	7.7096	0	0.2487	0.35944	0.3963	0.00-0.00	0.00-0.00	0	1
Methyl acetate	251.0157	1178.1904	8.9648	38.0061	0.024844	0.13844	0.00-0.00	0.00-36.78	5	13
Methyl butanoate	381.7474	27.7352	13.6338	0.89468	0.30429	0.3963	0.00-0.00	0.00-0.00	4	2
Methyl dodecanoate	15.98	0	0.57072	0	0.30855	0.3963	0.00-0.00	0.00-0.00	1	0
Methyl heptanoic acid	0	2.3832	0	0.076877	0.35944	0.3963	0.00-0.00	0.00-0.00	0	1
Methyl hexanoic acid	20.9929	2.4809	0.74975	0.080028	0.94211	0.94211	0.00-0.00	0.00-0.00	1	1
Methyl octanoate	53.0117	0	1.8933	0	0.13978	0.37566	0.00-0.00	0.00-0.00	2	0
Methyl pirazine	0	5.562	0	0.17942	0.35944	0.3963	0.00-0.00	0.00-0.00	0	1
n-Hexyl butyrate	86.7088	7.4649	3.0967	0.2408	0.94211	0.94211	0.00-0.00	0.00-0.00	1	1
Octyl acetate	0	8.6602	0	0.27936	0.35944	0.3963	0.00-0.00	0.00-0.00	0	1
Propyl butyrate	1652.5645	58.8157	59.0202	1.8973	0.0013309	0.057228	0.00-76.96	0.00-0.00	15	6
Propyl acetate	296.453	0	10.5876	0	0.032196	0.13844	0.00-0.00	0.00-0.00	4	0
Propyl decanoate	54.0235	0	1.9294	0	0.30855	0.3963	0.00-0.00	0.00-0.00	1	0
Propyl hexanoate	278.6343	0	9.9512	0	0.13978	0.37566	0.00-0.00	0.00-0.00	2	0
Propyl propionate	30.8337	0	1.1012	0	0.032196	0.13844	0.00-0.00	0.00-0.00	4	0
PHENOLS	Total CF	Total HC	Mean CF	Mean HC	p Value without correction	FDR-adjuasted p value	IQR CF range	IQR HC range	Detected CF (n/28)	Detected HC (n/31)
2,6-bis-(1,1-dimethylethyl)-Phenol	258.3436	38.6784	9.2266	1.2477	0.0091777	0.022944	0.00-20.50	0.00-0.00	10	3
2-Methoxy phenol/Guaiacol	0	14.0397	0	0.45289	0.35944	0.4493	0.00-0.00	0.00-0.00	0	1
3-Methyl phenol	1451.7861	942.5225	51.8495	30.404	0.94211	0.94211	0.00-0.00	0.00-0.00	1	1
4-Methyl phenol/p-Cresol	19913.6181	43261.0357	711.2006	1395.5173	0.043458	0.072429	0.00-1280.86	13.02-1178.39	9	23
Phenol	529.6081	1785.0729	18.9146	57.583	0.0026503	0.013252	0.00-17.39	8.66-84.17	13	25
ALDEHYDES	Total CF	Total HC	Mean CF	Mean HC	p Value without correction	FDR-adjuasted p value	IQR CF range	IQR HC range	Detected CF (n/28)	Detected HC (n/31)
2-Ethylbutanal	0	2.8342	0	0.091427	0.35944	0.42287	0.00-0.00	0.00-0.00	0	1
2-Ethylhexanal	0	35.16	0	1.1342	0.35944	0.42287	0.00-0.00	0.00-0.00	0	1
2-Hexenal	0	1.3932	0	0.044943	0.35944	0.42287	0.00-0.00	0.00-0.00	0	1
2-Methylbenzaldehyde	130.2087	384.5252	4.6503	12.404	0.34635	0.42287	0.00-0.00	0.00-11.08	5	8
2-Methylpropanal	0	1.4196	0	0.045794	0.35944	0.42287	0.00-0.00	0.00-0.00	0	1
3-Hydroxybutanal	0	4.8054	0	0.15501	0.18307	0.42287	0.00-0.00	0.00-0.00	0	2
3-Methylbutanal	19.9265	0	0.71166	0	0.13978	0.42287	0.00-0.00	0.00-0.00	2	0
4-Methylbenzaldehyde	824.2021	1293.3085	29.4358	41.7196	0.53101	0.55896	0.00-10.66	0.00-11.91	7	10
Acetaldehyde	137.794	0	4.9212	0	0.30855	0.42287	0.00-0.00	0.00-0.00	1	0
Benzaldehyde	1455.4051	2577.7434	51.9788	83.153	0.3891	0.43234	0.00-94.39	30.26-81.57	20	27
Heptanal	113.0829	0	4.0387	0	0.00033325	0.006665	0.00-2.78	0.00-0.00	10	0
Hexanal	480.2072	105.7132	17.1503	3.4101	0.0011531	0.0076876	0.00-22.96	0.00-1.46	18	8
Methylbenzaldehyde	0	115.4009	0	3.7226	0.18307	0.42287	0.00-0.00	0.00-0.00	0	2
Nonanal	186.8675	28.6527	6.6738	0.92428	0.00083154	0.0076876	0.00-8.49	0.00-1.46	17	8
Octanal	205.5313	35.2527	7.3404	1.1372	0.0050796	0.025398	0.00-7.75	0.00-1.34	17	8
Octenal	81.2966	0	2.9034	0	0.032196	0.12878	0.00-0.00	0.00-0.00	4	0
Pentanal	7.6855	123.0194	0.27448	3.9684	0.33817	0.42287	0.00-0.00	0.00-0.00	1	3
Phenyl acetaldehyde	452.5976	199.1718	16.1642	6.4249	0.87528	0.87528	0.00-0.00	0.00-0.00	6	7
Propanal	0	10.2523	0	0.33072	0.35944	0.42287	0.00-0.00	0.00-0.00	0	1
p-Tolyaldehyde	361.8158	0	12.922	0	0.30855	0.42287	0.00-0.00	0.00-0.00	1	0
FURANONES	Total CF	Total HC	Mean CF	Mean HC	p Value without correction	FDR-adjuasted p value	IQR CF range	IQR HC range	Detected CF (n/28)	Detected HC (n/31)
3-methyl-2-(5H)-furanone	9.5404	0	0.34073	0	0.30855	0.30855	0.00-0.00	0.00-0.00	1	0
Dihydro-2-methyl-3(2H)-furanone	7.9352	115.963	0.2834	3.7407	0.0048764	0.0097527	0.00-0.00	0.00-5.76	1	10
