# Supplementary material for: Gut microbiota signatures in cystic fibrosis: Loss of host CFTR function drives the microbiota enterophenotype
Source: PLoS One. 2018 Dec 6;13(12):e0208171. doi: 10.1371/journal.pone.0208171 (PMC6283533; doi:10.1371/journal.pone.0208171)
Supplement: S8 Table — (XLS) [file pone.0208171.s013.xls]

## Sheet: H-NMR
	Total CF	Total HC	Mean CF	Mean HC	p Value without correction	FDR-adjuasted p value	IQR CF range	IQR HC range
2-Hydroxy-isovalerate	0.18269	0.35664	0.0065246	0.011505	0.024187	0.035474	0.00-0.01	0.00-0.01
Isoleucine	3.8196	7.1197	0.13641	0.22967	0.001908	0.0066417	0.08-0.18	0.14-0.30
Leucine	2.8211	4.4976	0.10075	0.14508	0.027202	0.037403	0.06-0.13	0.09-0.19
Valine	7.6142	10.9983	0.27194	0.35478	0.084913	0.093404	0.17-0.37	0.20-0.51
Alanine	9.8889	16.1098	0.35318	0.51967	0.0051007	0.011222	0.22-0.50	0.31-0.68
Arginine	2.1091	3.7032	0.075327	0.11946	0.042718	0.049463	0.02-0.11	0.05-0.19
Methionine	0.67736	1.1165	0.024191	0.036016	0.012524	0.022961	0.01-0.03	0.02-0.05
4-Aminobutyrate	5.0179	2.2739	0.17921	0.07335	0.023249	0.035474	0.04-0.31	0.02-0.11
Glutamic acid	1.7338	5.0082	0.06192	0.16156	4.2979e-05	0.00031518	0.02-0.10	0.08-0.24
Sarcosine	0.31489	0.8221	0.011246	0.026519	1.948e-06	2.1428e-05	0.01-0.02	0.02-0.03
Choline	5.3799	1.6713	0.19214	0.053913	0.018255	0.030894	0.03-0.20	0.02-0.06
Glucose	0.86707	1.8666	0.030967	0.060212	0.0067379	0.013476	0.01-0.05	0.03-0.09
Glycine	10.6696	12.4205	0.38106	0.40066	0.30555	0.30555	0.16-0.56	0.27-0.54
Uracil	0.13606	0.5466	0.0048594	0.017632	8.0536e-08	1.7718e-06	0.00-0.01	0.01-0.02
Tyrosine	0.54454	0.94976	0.019448	0.030637	0.0042188	0.011222	0.01-0.03	0.02-0.04
3-Phenyllactate	0.13611	0.23669	0.0048612	0.0076353	0.031723	0.040271	0.00-0.01	0.00-0.01
Asparagine	0.38743	0.76621	0.013837	0.024716	0.0046408	0.011222	0.01-0.02	0.01-0.04
Phenylalanine	0.46735	0.54831	0.016691	0.017687	0.13888	0.14549	0.01-0.02	0.01-0.02
Butyrate	21.2092	41.8114	0.75747	1.3488	0.00069233	0.0032194	0.12-1.10	0.81-1.78
Isovalerate	4.2872	7.6983	0.15312	0.24833	0.032949	0.040271	0.05-0.20	0.08-0.30
Proprionate	8.5662	15.4973	0.30593	0.49991	0.0021133	0.0066417	0.12-0.47	0.30-0.69
Acetate	176.647	310.864	6.3088	10.0279	0.00073169	0.0032194	3.30-9.49	6.91-12.63
