# Supplementary material for: Gut microbiota signatures in cystic fibrosis: Loss of host CFTR function drives the microbiota enterophenotype
Source: PLoS One. 2018 Dec 6;13(12):e0208171. doi: 10.1371/journal.pone.0208171 (PMC6283533; doi:10.1371/journal.pone.0208171)
Supplement: S9 Table — (XLS) [file pone.0208171.s014.xls]

## Sheet: Spearman's correl-OTU-GC-MS
GENUS
Spearman's Correlation																Spearman Correlation																Spearman Correlation
	1-Propanol	2,3-Butanedione	2,4-Pentanedione	2,6 bis Phenol	2,6-Dimethyl-4-heptanone	2-Octanol	2-Pentanone	2-Undecanone	3-Hydroxy-2-butanone	3-Methyl-3-buten-2-one	3-Methylbutyl butyrate	4-Methylphenol	6-Methyl-5-hepten-2-one	Butyl propanoate	Dodecane	Ethanol	Ethyl acetate	Ethyl butyrate	Ethyl decanoate	Ethyl octanoate	Ethyl propionate	Heptanal	Hexanal	Nonanal	Octanal	Phenol	Propyl butyrate	Propyl propionate	Pyridine	Tetradecane	Tridecane	Acinetobacter	Bulleidia	Clostridiaceae	Dialister	Dorea	Eggerthella	Eubacterium	Geobacillus	Janibacter	Lachnospiraceae	Oscillospira	Pediococcus	Propionibacterium	Ruminococcus	Schlegelella	Others
1-Propanol	1	0	0.28498	0	0.271303	0	0	0	0	0.333665	0	0	0	0	0.2872	0.592051	0.284044	0	0	0	0.332437	0.279719	0.391409	0	0	-0.277674	0.302922	0.285155	0	0	0	0	0	0	0	-0.400992	-0.318853	-0.336201	0	0.26646	-0.381814	-0.453743	0	0	-0.327119	0	-0.479953
2,3-Butanedione	0	1	0	0	0.524021	0	0	0	0.62367	0.379544	0.269784	0	0.285272	0	0	0	0	0	0.266569	0	0	0.335243	0	0.373349	0	0	0	0	0.288077	0	0.279895	0	0	-0.377843	0	0	0	0	0	0	0	-0.311204	0	0	0	0	0
2,4-Pentanedione	0.28498	0	1	0	0.303214	0	0	0	0.268089	0	0.274693	0	0	0	0	0	0	0	0	0	0.304968	0.339743	0	0	0	0	0	0	0	0	0	0	0	0	0	0	0	0	0	0	0	0	0	0	0	0	0
2,6 bis Phenol	0	0	0	1	0.332262	0	-0.290006	0	0	0	0	-0.37405	0	0.305143	0	0	0	0	0	0.268089	0.356809	0.317183	0	0	0.428054	0	0	0.304793	0	0	0	0	0	0	-0.280538	-0.330288	0	-0.321207	0	0	0	0	0.261824	0	-0.265225	0	0
2,6-Dimethyl-4-heptanone	0.271303	0.524021	0.303214	0.332262	1	0	0	0	0.342373	0.383109	0.355348	0	0	0.324138	0.327002	0.357101	0	0	0	0.339918	0.431093	0.26803	0	0.361309	0.272648	0	0	0.396259	0.259906	0	0.398773	0	0	0	0	0	0	-0.287465	0	0	0	0	0	0	-0.286382	0	0
2-Octanol	0	0	0	0	0	1	0.295675	0	0	0.27668	0	0	0	0	0	0	0	0	0	0	0	0	0	0	0	0	-0.368381	0	0	0	0	-0.344205	0	0	0	0.280654	0	0	0	0	0	0	0	0	0	0	0
2-Pentanone	0	0	0	-0.290006	0	0.295675	1	0.272122	0	0	0	0	0	0	0	-0.28422	0	0	0	0	0	0	0	0	0	0	0	0	0	0	0	-0.301268	0	0	0	0.315332	0	0	-0.412518	-0.289083	0	0	0	-0.434579	0.355172	-0.39694	0
2-Undecanone	0	0	0	0	0	0	0.272122	1	0	0	0	0.30941	0	0	0	0	0	0	0	0	0	0	0	0	0	0.271888	0	0	0	0	0	0	0	0	0	0.306709	0	0	0	0	0.416519	0	0	0	0.415839	0	0
3-Hydroxy-2-butanone	0	0.62367	0.268089	0	0.342373	0	0	0	1	0	0	0	0	0	0	0.315956	0.359673	0	0	0	0	0	0	0.375687	0	0	0	0	0.260023	0	0.309819	0	0	0	-0.294637	0	0	0	-0.256501	0	0	-0.303057	0	0	0	0	0
3-Methyl-3-buten-2-one	0.333665	0.379544	0	0	0.383109	0.27668	0	0	0	1	0.27218	0	0	0	0	0	0	0	0	0.399123	0.423027	0	0	0	0	0	0	0.322034	0.304267	0	0	0	0	-0.299503	0	0	0	0	0	0	0	0	0	0	0	0	0
3-Methylbutyl butyrate	0	0.269784	0.274693	0	0.355348	0	0	0	0	0.27218	1	0	0	0.2955	0.342957	0	0	0.421859	0.387726	0	0.286324	0	0	0	0	0	0	0.294214	0.27142	0	0.317826	0	0	0	0	0	-0.283607	0	0	0	0	0	0	0	-0.409176	0	0
4-Methylphenol	0	0	0	-0.37405	0	0	0	0.30941	0	0	0	1	0	0	0	0	0	0	0	-0.281181	0	-0.368673	0	-0.284746	-0.373583	0.263355	0	0	-0.291233	0	0	0	0	0	0	0.406103	0.340223	0.393312	0	0	0.354126	0	0	0	0.322092	0	0
6-Methyl-5-hepten-2-one	0	0.285272	0	0	0	0	0	0	0	0	0	0	1	0	0	0	0	0	0.349737	0	0	0.414202	0	0	0.383343	0	0	0	0	0	0	0	0	0	0	0	0	0	0	0	0	0	0	0	0	0	0
Butyl propanoate	0	0	0	0.305143	0.324138	0	0	0	0	0	0.2955	0	0	1	0.328521	0.291876	0	0.260257	0	0	0.43495	0.32332	0	0.336119	0	0	0	0.485155	0	0.295909	0.279486	0	0	0	0	-0.397292	0	-0.430393	0	0	0	0	0	0	-0.321449	0	0
Dodecane	0.2872	0	0	0	0.327002	0	0	0	0	0	0.342957	0	0	0.328521	1	0	0	0	0	0	0.394155	0.323027	0.338457	0.423086	0.287551	0	0	0	0.309293	0.490357	0.41502	0	0	0	0	-0.305173	0	-0.276049	0	0	0	0	0	0	0	0	0
Ethanol	0.592051	0	0	0	0.357101	0	-0.28422	0	0.315956	0	0	0	0	0.291876	0	1	0.316423	0	0	0	0.256692	0	0.396084	0	0	0	0.309351	0.305552	0.25675	0	0	0	0	0	-0.268325	-0.472323	-0.30527	-0.431049	0	0	-0.363336	-0.261379	0	0.295615	-0.388194	0	-0.487259
Ethyl acetate	0.284044	0	0	0	0	0	0	0	0.359673	0	0	0	0	0	0	0.316423	1	0.350555	0	0	0	0.292168	0.329515	0.268323	0	0	0	0.412215	0	0	0	0	0	0	-0.328371	-0.333988	-0.269965	-0.455491	0	0	0	0	0	0	0	0	-0.537113
Ethyl butyrate	0	0	0	0	0	0	0	0	0	0	0.421859	0	0	0.260257	0	0	0.350555	1	0.376797	0.354646	0.261952	0.391642	0.319404	0.266803	0.346289	0	0.410169	0.292753	0.314202	0	0.283109	0.301503	0	0	0	-0.311695	-0.372834	0	0	0.360169	0	0	0	0.288858	-0.294097	0	-0.433781
Ethyl decanoate	0	0.266569	0	0	0	0	0	0	0	0	0.387726	0	0.349737	0	0	0	0	0.376797	1	0.318235	0	0.352718	0	0	0	0	0	0	0.300292	0	0	0	0	0	0	0	0	0	0	0	0	0	0	0	-0.268849	0	0
Ethyl octanoate	0	0	0	0.268089	0.339918	0	0	0	0	0.399123	0	-0.281181	0	0	0	0	0	0.354646	0.318235	1	0	0.345061	0.327937	0.334132	0.372764	0	0	0.449795	0.47066	0	0	0	0	-0.297866	0	0	0	0	0	0	0	0	0	0	0	0	0
Ethyl propionate	0.332437	0	0.304968	0.356809	0.431093	0	0	0	0	0.423027	0.286324	0	0	0.43495	0.394155	0.256692	0	0.261952	0	0	1	0.344302	0.371362	0	0.393805	0	0	0.540736	0	0.366511	0	0	0	0	0	0	-0.286651	-0.301505	0	0	-0.373979	0	0	0	-0.348977	0	0
Heptanal	0.279719	0.335243	0.339743	0.317183	0.26803	0	0	0	0	0	0	-0.368673	0.414202	0.32332	0.323027	0	0.292168	0.391642	0.352718	0.345061	0.344302	1	0.371011	0.454588	0.569608	0	0.260959	0.284921	0.37481	0.382466	0.257218	0	0	0	-0.259852	-0.436109	-0.419907	-0.36419	0	0	-0.259045	-0.27094	0	0	-0.402221	0	-0.345821
Hexanal	0.391409	0	0	0	0	0	0	0	0	0	0	0	0	0	0.338457	0.396084	0.329515	0.319404	0	0.327937	0.371362	0.371011	1	0.345295	0.543308	0	0	0.443542	0.377849	0.369316	0	0	0	0	-0.544472	-0.348881	-0.356734	0	0	0	0	-0.305279	0	0.275108	0	0	-0.437756
Nonanal	0	0.373349	0	0	0.361309	0	0	0	0.375687	0	0	-0.284746	0	0.336119	0.423086	0	0.268323	0.266803	0	0.334132	0	0.454588	0.345295	1	0.509877	0	0	0.353068	0.351257	0	0.40678	0	0	0	0	-0.26529	-0.313876	-0.277778	0	0	0	0	0	0	0	0	0
Octanal	0	0	0	0.428054	0.272648	0	0	0	0	0	0	-0.373583	0.383343	0	0.287551	0	0	0.346289	0	0.372764	0.393805	0.569608	0.543308	0.509877	1	0	0	0	0.45149	0.332788	0.312566	0	0	0	-0.354375	-0.461475	-0.427635	-0.333697	0	0	-0.266589	0	0	0	0	0	-0.302688
Phenol	-0.277674	0	0	0	0	0	0	0.271888	0	0	0	0.263355	0	0	0	0	0	0	0	0	0	0	0	0	0	1	0	0	0	0	0	0	0	0	0	0	0.294965	0	0	-0.263331	0	0	0	0	0	0	0
Propyl butyrate	0.302922	0	0	0	0	-0.368381	0	0	0	0	0	0	0	0	0	0.309351	0	0.410169	0	0	0	0.260959	0	0	0	0	1	0	0	0.332496	0	0	0	0.31558	-0.268541	-0.350668	-0.393619	-0.298941	0	0	0	0	0	0.275226	-0.268732	0	-0.259264
Propyl propionate	0.285155	0	0	0.304793	0.396259	0	0	0	0	0.322034	0.294214	0	0	0.485155	0	0.305552	0.412215	0.292753	0	0.449795	0.540736	0.284921	0.443542	0.353068	0	0	0	1	0.296786	0	0	0	0	0	-0.369526	0	0	-0.293814	0	0	0	0	0	0	0	0	-0.305202
Pyridine	0	0.288077	0	0	0.259906	0	0	0	0.260023	0.304267	0.27142	-0.291233	0	0	0.309293	0.25675	0	0.314202	0.300292	0.47066	0	0.37481	0.377849	0.351257	0.45149	0	0	0.296786	1	0	0.290649	0.305342	0	0	0	0	0	0	0	0	0	0	0	0	0	0	0
Tetradecane	0	0	0	0	0	0	0	0	0	0	0	0	0	0.295909	0.490357	0	0	0	0	0	0.366511	0.382466	0.369316	0	0.332788	0	0.332496	0	0	1	0	0	-0.283227	0	0	-0.364558	-0.353338	-0.314083	0	0	0	0	0	0	0	0	0
Tridecane	0	0.279895	0	0	0.398773	0	0	0	0.309819	0	0.317826	0	0	0.279486	0.41502	0	0	0.283109	0	0	0	0.257218	0	0.40678	0.312566	0	0	0	0.290649	0	1	0	0	0	0	0	0	0	0	0	0	0	0	0	0	0	0
Acinetobacter	0	0	0	0	0	-0.344205	-0.301268	0	0	0	0	0	0	0	0	0	0	0.301503	0	0	0	0	0	0	0	0	0	0	0.305342	0	0	1	0	0	0	0	0	0	0.322946	0.299923	-0.263597	0	0	0.484062	-0.302835	0.577451	0
Bulleidia	0	0	0	0	0	0	0	0	0	0	0	0	0	0	0	0	0	0	0	0	0	0	0	0	0	0	0	0	0	-0.283227	0	0	1	0	0	0.321696	0.29386	0	0	0	0	0	0	0	0	0	0
Clostridiaceae	0	-0.377843	0	0	0	0	0	0	0	-0.299503	0	0	0	0	0	0	0	0	0	-0.297866	0	0	0	0	0	0	0.31558	0	0	0	0	0	0	1	0	0	-0.279532	0	0	0	-0.344637	0	0	0	0	0	0
Dialister	0	0	0	-0.280538	0	0	0	0	-0.294637	0	0	0	0	0	0	-0.268325	-0.328371	0	0	0	0	-0.259852	-0.544472	0	-0.354375	0	-0.268541	-0.369526	0	0	0	0	0	0	1	0.36903	0.410009	0.401177	0	0	0	0.440881	0	0	0	0	0.491413
Dorea	-0.400992	0	0	-0.330288	0	0.280654	0.315332	0.306709	0	0	0	0.406103	0	-0.397292	-0.305173	-0.472323	-0.333988	-0.311695	0	0	0	-0.436109	-0.348881	-0.26529	-0.461475	0	-0.350668	0	0	-0.364558	0	0	0.321696	0	0.36903	1	0.614779	0.769969	-0.277646	-0.261194	0.480423	0.334989	0	-0.31097	0.467777	0	0.610628
Eggerthella	-0.318853	0	0	0	0	0	0	0	0	0	-0.283607	0.340223	0	0	0	-0.30527	-0.269965	-0.372834	0	0	-0.286651	-0.419907	-0.356734	-0.313876	-0.427635	0.294965	-0.393619	0	0	-0.353338	0	0	0.29386	-0.279532	0.410009	0.614779	1	0.511473	0	-0.299175	0.403398	0	0	0	0.386535	0	0.436359
Eubacterium	-0.336201	0	0	-0.321207	-0.287465	0	0	0	0	0	0	0.393312	0	-0.430393	-0.276049	-0.431049	-0.455491	0	0	0	-0.301505	-0.36419	0	-0.277778	-0.333697	0	-0.298941	-0.293814	0	-0.314083	0	0	0	0	0.401177	0.769969	0.511473	1	0	0	0.497059	0.354451	0	0	0.348869	0	0.579014
Geobacillus	0	0	0	0	0	0	-0.412518	0	-0.256501	0	0	0	0	0	0	0	0	0	0	0	0	0	0	0	0	0	0	0	0	0	0	0.322946	0	0	0	-0.277646	0	0	1	0	0	0	0.289589	0.405425	0	0.425993	0
Janibacter	0.26646	0	0	0	0	0	-0.289083	0	0	0	0	0	0	0	0	0	0	0.360169	0	0	0	0	0	0	0	-0.263331	0	0	0	0	0	0.299923	0	0	0	-0.261194	-0.299175	0	0	1	0	0	0.386955	0.494965	0	0.404992	-0.257966
Lachnospiraceae	-0.381814	0	0	0	0	0	0	0.416519	0	0	0	0.354126	0	0	0	-0.363336	0	0	0	0	-0.373979	-0.259045	0	0	-0.266589	0	0	0	0	0	0	-0.263597	0	-0.344637	0	0.480423	0.403398	0.497059	0	0	1	0.436393	0	-0.306554	0.51198	0	0.325239
Oscillospira	-0.453743	-0.311204	0	0	0	0	0	0	-0.303057	0	0	0	0	0	0	-0.261379	0	0	0	0	0	-0.27094	-0.305279	0	0	0	0	0	0	0	0	0	0	0	0.440881	0.334989	0	0.354451	0	0	0.436393	1	0	0	0.306289	0	0.370994
Pediococcus	0	0	0	0.261824	0	0	0	0	0	0	0	0	0	0	0	0	0	0	0	0	0	0	0	0	0	0	0	0	0	0	0	0	0	0	0	0	0	0	0.289589	0.386955	0	0	1	0.363507	0	0.336787	0
Propionibacterium	0	0	0	0	0	0	-0.434579	0	0	0	0	0	0	0	0	0.295615	0	0.288858	0	0	0	0	0.275108	0	0	0	0.275226	0	0	0	0	0.484062	0	0	0	-0.31097	0	0	0.405425	0.494965	-0.306554	0	0.363507	1	0	0.437762	0
Ruminococcus	-0.327119	0	0	-0.265225	-0.286382	0	0.355172	0.415839	0	0	-0.409176	0.322092	0	-0.321449	0	-0.388194	0	-0.294097	-0.268849	0	-0.348977	-0.402221	0	0	0	0	-0.268732	0	0	0	0	-0.302835	0	0	0	0.467777	0.386535	0.348869	0	0	0.51198	0.306289	0	0	1	0	0.339509
Schlegelella	0	0	0	0	0	0	-0.39694	0	0	0	0	0	0	0	0	0	0	0	0	0	0	0	0	0	0	0	0	0	0	0	0	0.577451	0	0	0	0	0	0	0.425993	0.404992	0	0	0.336787	0.437762	0	1	0
Others	-0.479953	0	0	0	0	0	0	0	0	0	0	0	0	0	0	-0.487259	-0.537113	-0.433781	0	0	0	-0.345821	-0.437756	0	-0.302688	0	-0.259264	-0.305202	0	0	0	0	0	0	0.491413	0.610628	0.436359	0.579014	0	-0.257966	0.325239	0.370994	0	0	0.339509	0	1
GENUS
p-values
	1-Propanol	2,3-Butanedione	2,4-Pentanedione	2,6 bis Phenol	2,6-Dimethyl-4-heptanone	2-Octanol	2-Pentanone	2-Undecanone	3-Hydroxy-2-butanone	3-Methyl-3-buten-2-one	3-Methylbutyl butyrate	4-Methylphenol	6-Methyl-5-hepten-2-one	Butyl propanoate	Dodecane	Ethanol	Ethyl acetate	Ethyl butyrate	Ethyl decanoate	Ethyl octanoate	Ethyl propionate	Heptanal	Hexanal	Nonanal	Octanal	Phenol	Propyl butyrate	Propyl propionate	Pyridine	Tetradecane	Tridecane	Acinetobacter	Bulleidia	Clostridiaceae	Dialister	Dorea	Eggerthella	Eubacterium	Geobacillus	Janibacter	Lachnospiraceae	Oscillospira	Pediococcus	Propionibacterium	Ruminococcus	Schlegelella	Others
1-Propanol	0	0.428821	0.0286901	0.597919	0.0376641	0.355789	0.211252	0.101477	0.0731812	0.00980698	0.656013	0.300828	0.161413	0.146057	0.0274176	7.853e-07	0.0292406	0.42213	0.352098	0.207993	0.0100972	0.0319027	0.00217342	0.102431	0.178503	0.0332306	0.0196959	0.0285879	0.0890085	0.188127	0.704408	0.976037	0.645232	0.368046	0.0696556	0.00164732	0.0138407	0.00923003	0.335792	0.0413531	0.00284542	0.000306973	0.23587	0.200249	0.0114427	0.638216	0.000119751
2,3-Butanedione	0.428821	0	0.0862964	0.0611936	2.04904e-05	0.170081	0.839132	0.148073	1.31562e-07	0.0030292	0.0387911	0.460734	0.0285199	0.425983	0.238975	0.117583	0.0680406	0.789321	0.041267	0.101858	0.353941	0.00944444	0.650612	0.00358547	0.0792507	0.817891	0.0571061	0.423412	0.0269284	0.635771	0.031791	0.849562	0.177158	0.00317377	0.626943	0.645165	0.48812	0.781068	0.0808389	0.342734	0.678766	0.0164326	0.737065	0.48878	0.20429	0.550724	0.947808
2,4-Pentanedione	0.0286901	0.0862964	0	0.13043	0.019572	0.502872	0.429855	0.906269	0.0400808	0.125214	0.0352477	0.124991	0.118436	0.546321	0.0613849	0.464238	0.243467	0.174898	0.116945	0.11737	0.0188425	0.0084737	0.730388	0.31242	0.345922	0.317998	0.0957175	0.0808286	0.439754	0.272988	0.0583207	0.948343	0.904628	0.592006	0.236389	0.24611	0.295414	0.0559401	0.632685	0.276082	0.341706	0.0951585	0.927698	0.888641	0.125102	0.179522	0.744991
2,6 bis Phenol	0.597919	0.0611936	0.13043	0	0.0101393	0.993691	0.0258781	0.575456	0.162359	0.448452	0.18858	0.00351825	0.445014	0.0187708	0.681664	0.14221	0.292576	0.586032	0.855657	0.0400808	0.00553703	0.0143744	0.0574078	0.0571664	0.000719716	0.889579	0.882638	0.0189144	0.206055	0.13345	0.228776	0.24407	0.825566	0.746585	0.031384	0.0106235	0.0514667	0.0131172	0.760175	0.656076	0.111601	0.232949	0.0451588	0.29284	0.0423403	0.105595	0.270263
2,6-Dimethyl-4-heptanone	0.0376641	2.04904e-05	0.019572	0.0101393	0	0.103488	0.918466	0.824387	0.00794758	0.00274508	0.00574761	0.487777	0.161548	0.0122625	0.011474	0.00549573	0.0610664	0.466672	0.262767	0.0084377	0.000652955	0.0401259	0.256722	0.0049304	0.03669	0.104165	0.484455	0.00189086	0.0468146	0.0982863	0.00175779	0.754823	0.845508	0.616618	0.101052	0.12948	0.473782	0.0272691	0.489384	0.585659	0.494654	0.119301	0.369362	0.563178	0.0278808	0.301108	0.208155
2-Octanol	0.355789	0.170081	0.502872	0.993691	0.103488	0	0.0229885	0.0711465	0.230339	0.033892	0.681342	0.946758	0.376755	0.788644	0.749657	0.749324	0.680373	0.284673	0.164813	0.465048	0.884025	0.874666	0.727743	0.324294	0.78222	0.209781	0.00409499	0.608059	0.814476	0.143072	0.269487	0.00759803	0.494098	0.0999581	0.761029	0.0313112	0.0680279	0.698438	0.455526	0.617592	0.0516008	0.810362	0.795036	0.0844972	0.307538	0.64473	0.866016
2-Pentanone	0.211252	0.839132	0.429855	0.0258781	0.918466	0.0229885	0	0.0370686	0.517917	0.835011	0.227221	0.252806	0.449513	0.329784	0.162495	0.0291367	0.43115	0.959356	0.536091	0.583304	0.780532	0.531157	0.334887	0.190552	0.674251	0.111533	0.103295	0.813453	0.662071	0.465048	0.689108	0.0204099	0.360481	0.213584	0.747768	0.0149866	0.0688654	0.258566	0.00116746	0.0263765	0.160252	0.769019	0.0962636	0.000583307	0.00577335	0.00185396	0.425468
2-Undecanone	0.101477	0.148073	0.906269	0.575456	0.824387	0.0711465	0.0370686	0	0.982825	0.488332	0.796439	0.0170973	0.322114	0.934872	0.60775	0.824387	0.953406	0.498094	0.559908	0.979672	0.608059	0.47347	0.838102	0.509657	0.628872	0.037238	0.764378	0.774463	0.546615	0.994742	0.329122	0.388615	0.106061	0.152562	0.387736	0.0181411	0.0671299	0.273444	0.817623	0.958725	0.00103297	0.662742	0.282474	0.43887	0.00105482	0.417491	0.423156
3-Hydroxy-2-butanone	0.0731812	1.31562e-07	0.0400808	0.162359	0.00794758	0.230339	0.517917	0.982825	0	0.107303	0.322985	0.0548549	0.42213	0.799495	0.274553	0.0147778	0.00514386	0.797458	0.672323	0.145431	0.816525	0.0514474	0.132398	0.00336574	0.141841	0.0745881	0.70049	0.310504	0.0467123	0.524516	0.0169437	0.723216	0.426587	0.127009	0.0234959	0.200697	0.389236	0.111971	0.0498781	0.791606	0.809948	0.0196388	0.928941	0.838972	0.393508	0.938933	0.477025
3-Methyl-3-buten-2-one	0.00980698	0.0030292	0.125214	0.448452	0.00274508	0.033892	0.835011	0.488332	0.107303	0	0.0370264	0.819257	0.117051	0.183936	0.070645	0.0657158	0.41145	0.334664	0.124657	0.00173991	0.000843773	0.0638494	0.218715	0.235424	0.07886	0.153984	0.455104	0.0128711	0.0191315	0.966359	0.102718	0.574069	0.508102	0.0211956	0.389285	0.602354	0.809374	0.599158	0.186143	0.902102	0.712947	0.0773666	0.548413	0.450539	0.0591833	0.406478	0.224817
3-Methylbutyl butyrate	0.656013	0.0387911	0.0352477	0.18858	0.00574761	0.681342	0.227221	0.796439	0.322985	0.0370264	0	0.776485	0.779182	0.0230736	0.0078346	0.630124	0.340715	0.000875257	0.00241244	0.134389	0.0279141	0.0562682	0.315845	0.0741415	0.398445	0.380842	0.326922	0.0237058	0.0375786	0.437398	0.0141669	0.155895	0.182351	0.936951	0.176395	0.129112	0.0295011	0.194615	0.300735	0.190736	0.82447	0.676045	0.98783	0.0925659	0.00129166	0.786203	0.22277
4-Methylphenol	0.300828	0.460734	0.124991	0.00351825	0.487777	0.946758	0.252806	0.0170973	0.0548549	0.819257	0.776485	0	0.303543	0.286484	0.539005	0.0689468	0.602211	0.178939	0.125214	0.0309816	0.939066	0.00406334	0.192385	0.0288269	0.00356294	0.0438718	0.28287	0.559314	0.0252279	0.232959	0.075563	0.645643	0.062166	0.410051	0.0839242	0.0014162	0.00837544	0.00205833	0.339736	0.134093	0.00592902	0.261116	0.502271	0.557799	0.0128539	0.68584	0.0530721
6-Methyl-5-hepten-2-one	0.161413	0.0285199	0.118436	0.445014	0.161548	0.376755	0.449513	0.322114	0.42213	0.117051	0.779182	0.303543	0	0.355327	0.123437	0.320593	0.602519	0.948157	0.00662297	0.773116	0.139889	0.00110905	0.762366	0.122886	0.0027273	0.791353	0.370555	0.596389	0.550439	0.483627	0.063652	0.250438	0.601992	0.774736	0.643062	0.417233	0.837133	0.395142	0.391321	0.299592	0.180245	0.441122	0.29915	0.101415	0.672965	0.119762	0.631691
Butyl propanoate	0.146057	0.425983	0.546321	0.0187708	0.0122625	0.788644	0.329784	0.934872	0.799495	0.183936	0.0230736	0.286484	0.355327	0	0.0110736	0.0248928	0.115679	0.0465082	0.162631	0.335333	0.000576307	0.0124962	0.231559	0.0092481	0.0618972	0.320377	0.732374	9.84342e-05	0.123437	0.0228754	0.0320522	0.120118	0.27189	0.625022	0.668821	0.00183513	0.537997	0.000667814	0.837121	0.241243	0.0891411	0.379911	0.585653	0.239837	0.0130448	0.336282	0.348659
Dodecane	0.0274176	0.238975	0.0613849	0.681664	0.011474	0.749657	0.162495	0.60775	0.274553	0.070645	0.0078346	0.539005	0.123437	0.0110736	0	0.379637	0.274749	0.119834	0.411955	0.336897	0.00200911	0.0125805	0.00874177	0.000842226	0.027221	0.383259	0.481146	0.169661	0.0171414	8.06554e-05	0.00108163	0.659267	0.594368	0.969853	0.384904	0.0187588	0.170583	0.034318	0.224458	0.406589	0.0594839	0.183247	0.409601	0.149684	0.0717955	0.584332	0.27711
Ethanol	7.853e-07	0.117583	0.464238	0.14221	0.00549573	0.749324	0.0291367	0.824387	0.0147778	0.0657158	0.630124	0.0689468	0.320593	0.0248928	0.379637	0	0.014623	0.284272	0.256535	0.157666	0.0497018	0.106118	0.00190047	0.219555	0.123327	0.225673	0.0171193	0.0186045	0.049648	0.220061	0.145807	0.15257	0.464779	0.979666	0.0398994	0.000158748	0.0187192	0.000653884	0.958294	0.0983155	0.00467685	0.0455389	0.0598013	0.0230176	0.00238084	0.554789	9.0849e-05
Ethyl acetate	0.0292406	0.0680406	0.243467	0.292576	0.0610664	0.680373	0.43115	0.953406	0.00514386	0.41145	0.340715	0.602211	0.602519	0.115679	0.274749	0.014623	0	0.00648846	0.0560306	0.0604964	0.217041	0.0247418	0.0108185	0.0399008	0.279881	0.872589	0.0886658	0.00117827	0.104262	0.766392	0.387876	0.218582	0.794453	0.973006	0.0111126	0.00973181	0.038655	0.00028897	0.407498	0.57411	0.121049	0.0619497	0.157897	0.521133	0.272012	0.314683	1.15499e-05
Ethyl butyrate	0.42213	0.789321	0.174898	0.586032	0.466672	0.284673	0.959356	0.498094	0.797458	0.334664	0.000875257	0.178939	0.948157	0.0465082	0.119834	0.284272	0.00648846	0	0.00326562	0.00585116	0.04505	0.00215898	0.0136684	0.0410826	0.00721702	0.261626	0.00125356	0.024442	0.015371	0.44607	0.0297998	0.0203071	0.454902	0.40353	0.155708	0.0162547	0.00363551	0.0517546	0.51976	0.00507834	0.0559601	0.114061	0.0591366	0.0264991	0.023764	0.425123	0.000598625
Ethyl decanoate	0.352098	0.041267	0.116945	0.855657	0.262767	0.164813	0.536091	0.559908	0.672323	0.124657	0.00241244	0.125214	0.00662297	0.162631	0.411955	0.256535	0.0560306	0.00326562	0	0.0140362	0.153333	0.00614442	0.606826	0.583304	0.0692275	0.305221	0.463158	0.0699334	0.0208411	0.711939	0.174327	0.466675	0.569979	0.415109	0.328788	0.162669	0.0600941	0.215974	0.939827	0.49764	0.070926	0.849051	0.45726	0.838627	0.0394983	0.0632277	0.235247
Ethyl octanoate	0.207993	0.101858	0.11737	0.0400808	0.0084377	0.465048	0.583304	0.979672	0.145431	0.00173991	0.134389	0.0309816	0.773116	0.335333	0.336897	0.157666	0.0604964	0.00585116	0.0140362	0	0.372456	0.00743941	0.0112261	0.00969832	0.00364234	0.461272	0.447657	0.000351463	0.00016866	0.628247	0.0550299	0.598888	0.599083	0.0219472	0.0532671	0.116604	0.227775	0.193513	0.82116	0.843854	0.212987	0.0634457	0.544491	0.768214	0.0959902	0.535942	0.0510613
Ethyl propionate	0.0100972	0.353941	0.0188425	0.00553703	0.000652955	0.884025	0.780532	0.608059	0.816525	0.000843773	0.0279141	0.939066	0.139889	0.000576307	0.00200911	0.0497018	0.217041	0.04505	0.153333	0.372456	0	0.00758007	0.00378212	0.0603704	0.00202945	0.362073	0.564373	9.8133e-06	0.104553	0.00430278	0.35049	0.324115	0.573893	0.303609	0.0618128	0.0911589	0.0277276	0.0203064	0.898316	0.439943	0.00352507	0.0566599	0.660798	0.816588	0.00675006	0.708252	0.192538
Heptanal	0.0319027	0.00944444	0.0084737	0.0143744	0.0401259	0.874666	0.531157	0.47347	0.0514474	0.0638494	0.0562682	0.00406334	0.00110905	0.0124962	0.0125805	0.106118	0.0247418	0.00215898	0.00614442	0.00743941	0.00758007	0	0.00381779	0.000298149	2.49742e-06	0.210924	0.0459002	0.0287243	0.0034467	0.00279449	0.0492196	0.497708	0.165297	0.138321	0.0468621	0.000554933	0.000930191	0.0045735	0.931508	0.647335	0.0475742	0.0379312	0.0977337	0.489618	0.00158885	0.444244	0.00730105
Hexanal	0.00217342	0.650612	0.730388	0.0574078	0.256722	0.727743	0.334887	0.838102	0.132398	0.218715	0.315845	0.192385	0.762366	0.231559	0.00874177	0.00190047	0.0108185	0.0136684	0.606826	0.0112261	0.00378212	0.00381779	0	0.0073966	8.73165e-06	0.483075	0.0533564	0.000434057	0.00317321	0.00399446	0.364652	0.0829569	0.769229	0.0792388	8.27953e-06	0.00676632	0.00554771	0.219387	0.121101	0.330756	0.108564	0.0187157	0.607709	0.0349608	0.187825	0.119268	0.000525788
Nonanal	0.102431	0.00358547	0.31242	0.0571664	0.0049304	0.324294	0.190552	0.509657	0.00336574	0.235424	0.0741415	0.0288269	0.122886	0.0092481	0.000842226	0.219555	0.0399008	0.0410826	0.583304	0.00969832	0.0603704	0.000298149	0.0073966	0	3.70866e-05	0.0986576	0.626059	0.00609016	0.00637508	0.209781	0.00138788	0.308834	0.838985	0.889546	0.101453	0.0422879	0.0154834	0.0331621	0.986213	0.510587	0.0873932	0.117086	0.743277	0.752385	0.155817	0.0645893	0.110921
Octanal	0.178503	0.0792507	0.345922	0.000719716	0.03669	0.78222	0.674251	0.628872	0.141841	0.07886	0.398445	0.00356294	0.0027273	0.0618972	0.027221	0.123327	0.279881	0.00721702	0.0692275	0.00364234	0.00202945	2.49742e-06	8.73165e-06	3.70866e-05	0	0.30923	0.713251	0.0730343	0.00033169	0.0100136	0.0159429	0.325581	0.498743	0.603027	0.00589166	0.000234375	0.000729376	0.00979942	0.64017	0.440344	0.0412516	0.145827	0.554715	0.965122	0.169381	0.0849005	0.0197955
Phenol	0.0332306	0.817891	0.317998	0.889579	0.104165	0.209781	0.111533	0.037238	0.0745881	0.153984	0.380842	0.0438718	0.791353	0.320377	0.383259	0.225673	0.872589	0.261626	0.305221	0.461272	0.362073	0.210924	0.483075	0.0986576	0.30923	0	0.994742	0.458585	0.517345	0.553095	0.645544	0.110019	0.17325	0.296128	0.810934	0.135289	0.0233346	0.870413	0.45525	0.0438917	0.0590184	0.639348	0.341567	0.264586	0.052003	0.330163	0.22294
Propyl butyrate	0.0196959	0.0571061	0.0957175	0.882638	0.484455	0.00409499	0.103295	0.764378	0.70049	0.455104	0.326922	0.28287	0.370555	0.732374	0.481146	0.0171193	0.0886658	0.00125356	0.463158	0.447657	0.564373	0.0459002	0.0533564	0.626059	0.713251	0.994742	0	0.273379	0.724111	0.0100832	0.985629	0.266592	0.202897	0.0149031	0.0397333	0.0064701	0.00204031	0.0214511	0.468913	0.189341	0.180172	0.231537	0.24448	0.03488	0.0395875	0.692537	0.0473808
Propyl propionate	0.0285879	0.423412	0.0808286	0.0189144	0.00189086	0.608059	0.813453	0.774463	0.310504	0.0128711	0.0237058	0.559314	0.596389	9.84342e-05	0.169661	0.0186045	0.00117827	0.024442	0.0699334	0.000351463	9.8133e-06	0.0287243	0.000434057	0.00609016	0.0730343	0.458585	0.273379	0	0.0224557	0.948157	0.399685	0.677316	0.671685	0.847342	0.00397221	0.081764	0.166535	0.0239053	0.310531	0.492509	0.138836	0.112512	0.727044	0.572499	0.0574683	0.112744	0.018747
Pyridine	0.0890085	0.0269284	0.439754	0.206055	0.0468146	0.814476	0.662071	0.546615	0.0467123	0.0191315	0.0375786	0.0252279	0.550439	0.123437	0.0171414	0.049648	0.104262	0.015371	0.0208411	0.00016866	0.104553	0.0034467	0.00317321	0.00637508	0.00033169	0.517345	0.724111	0.0224557	0	0.857037	0.0255358	0.0186898	0.848365	0.1505	0.130724	0.0893445	0.0853142	0.17945	0.815149	0.0852891	0.463738	0.231739	0.242067	0.268839	0.0876442	0.255337	0.106808
Tetradecane	0.188127	0.635771	0.272988	0.13345	0.0982863	0.143072	0.465048	0.994742	0.524516	0.966359	0.437398	0.232959	0.483627	0.0228754	8.06554e-05	0.220061	0.766392	0.44607	0.711939	0.628247	0.00430278	0.00279449	0.00399446	0.209781	0.0100136	0.553095	0.0100832	0.948157	0.857037	0	0.115679	0.499589	0.0297291	0.0513216	0.0952244	0.0045296	0.00604876	0.0154119	0.0735421	0.483175	0.12783	0.875713	0.225633	0.722028	0.231559	0.226925	0.327801
Tridecane	0.704408	0.031791	0.0583207	0.228776	0.00175779	0.269487	0.689108	0.329122	0.0169437	0.102718	0.0141669	0.075563	0.063652	0.0320522	0.00108163	0.145807	0.387876	0.0297998	0.174327	0.0550299	0.35049	0.0492196	0.364652	0.00138788	0.0159429	0.645544	0.985629	0.399685	0.0255358	0.115679	0	0.996241	0.779611	0.275786	0.973116	0.292228	0.593294	0.437638	0.211291	0.470599	0.703447	0.888098	0.294739	0.851772	0.171629	0.589208	0.663989
Acinetobacter	0.976037	0.849562	0.948343	0.24407	0.754823	0.00759803	0.0204099	0.388615	0.723216	0.574069	0.155895	0.645643	0.250438	0.120118	0.659267	0.15257	0.218582	0.0203071	0.466675	0.598888	0.324115	0.497708	0.0829569	0.308834	0.325581	0.110019	0.266592	0.677316	0.0186898	0.499589	0.996241	0	0.948772	0.271377	0.517757	0.0609276	0.111287	0.891756	0.0126041	0.0210063	0.0436706	0.252144	0.422311	0.000102602	0.019733	1.68323e-06	0.574472
Bulleidia	0.645232	0.177158	0.904628	0.825566	0.845508	0.494098	0.360481	0.106061	0.426587	0.508102	0.182351	0.062166	0.601992	0.27189	0.594368	0.464779	0.794453	0.454902	0.569979	0.599083	0.573893	0.165297	0.769229	0.838985	0.498743	0.17325	0.202897	0.671685	0.848365	0.0297291	0.779611	0.948772	0	0.596434	0.329989	0.0129713	0.0238823	0.13729	0.460991	0.732901	0.419504	0.120937	0.717055	0.644589	0.0974827	0.610228	0.175451
Clostridiaceae	0.368046	0.00317377	0.592006	0.746585	0.616618	0.0999581	0.213584	0.152562	0.127009	0.0211956	0.936951	0.410051	0.774736	0.625022	0.969853	0.979666	0.973006	0.40353	0.415109	0.0219472	0.303609	0.138321	0.0792388	0.889546	0.603027	0.296128	0.0149031	0.847342	0.1505	0.0513216	0.275786	0.271377	0.596434	0	0.0633459	0.199042	0.0320227	0.539958	0.473857	0.328587	0.00751769	0.593855	0.838764	0.153318	0.416888	0.832273	0.1752
Dialister	0.0696556	0.626943	0.236389	0.031384	0.101052	0.761029	0.747768	0.387736	0.0234959	0.389285	0.176395	0.0839242	0.643062	0.668821	0.384904	0.0398994	0.0111126	0.155708	0.328788	0.0532671	0.0618128	0.0468621	8.27953e-06	0.101453	0.00589166	0.810934	0.0397333	0.00397221	0.130724	0.0952244	0.973116	0.517757	0.329989	0.0633459	0	0.00402503	0.00125965	0.0016384	0.638142	0.856354	0.265064	0.00047427	0.787712	0.88997	0.215944	0.545766	7.7427e-05
Dorea	0.00164732	0.645165	0.24611	0.0106235	0.12948	0.0313112	0.0149866	0.0181411	0.200697	0.602354	0.129112	0.0014162	0.417233	0.00183513	0.0187588	0.000158748	0.00973181	0.0162547	0.162669	0.116604	0.0911589	0.000554933	0.00676632	0.0422879	0.000234375	0.135289	0.0064701	0.081764	0.0893445	0.0045296	0.292228	0.0609276	0.0129713	0.199042	0.00402503	0	2.21787e-07	1.02005e-12	0.0332489	0.0456974	0.000117663	0.00950181	0.0628388	0.016518	0.000187199	0.060167	2.81488e-07
Eggerthella	0.0138407	0.48812	0.295414	0.0514667	0.473782	0.0680279	0.0688654	0.0671299	0.389236	0.809374	0.0295011	0.00837544	0.837133	0.537997	0.170583	0.0187192	0.038655	0.00363551	0.0600941	0.227775	0.0277276	0.000930191	0.00554771	0.0154834	0.000729376	0.0233346	0.00204031	0.166535	0.0853142	0.00604876	0.593294	0.111287	0.0238823	0.0320227	0.00125965	2.21787e-07	0	3.47306e-05	0.326907	0.0213444	0.00153461	0.108248	0.111302	0.582138	0.00249467	0.17708	0.000550415
Eubacterium	0.00923003	0.781068	0.0559401	0.0131172	0.0272691	0.698438	0.258566	0.273444	0.111971	0.599158	0.194615	0.00205833	0.395142	0.000667814	0.034318	0.000653884	0.00028897	0.0517546	0.215974	0.193513	0.0203064	0.0045735	0.219387	0.0331621	0.00979942	0.870413	0.0214511	0.0239053	0.17945	0.0154119	0.437638	0.891756	0.13729	0.539958	0.0016384	1.02005e-12	3.47306e-05	0	0.370471	0.315191	6.20995e-05	0.00588023	0.336055	0.494579	0.00676833	0.760378	1.55407e-06
Geobacillus	0.335792	0.0808389	0.632685	0.760175	0.489384	0.455526	0.00116746	0.817623	0.0498781	0.186143	0.300735	0.339736	0.391321	0.837121	0.224458	0.958294	0.407498	0.51976	0.939827	0.82116	0.898316	0.931508	0.121101	0.986213	0.64017	0.45525	0.468913	0.310531	0.815149	0.0735421	0.211291	0.0126041	0.460991	0.473857	0.638142	0.0332489	0.326907	0.370471	0	0.200195	0.396172	0.188163	0.0261024	0.00144509	0.377513	0.000768426	0.837832
Janibacter	0.0413531	0.342734	0.276082	0.656076	0.585659	0.617592	0.0263765	0.958725	0.791606	0.902102	0.190736	0.134093	0.299592	0.241243	0.406589	0.0983155	0.57411	0.00507834	0.49764	0.843854	0.439943	0.647335	0.330756	0.510587	0.440344	0.0438917	0.189341	0.492509	0.0852891	0.483175	0.470599	0.0210063	0.732901	0.328587	0.856354	0.0456974	0.0213444	0.315191	0.200195	0	0.0886029	0.393263	0.00246537	6.74231e-05	0.540555	0.00146378	0.0485408
Lachnospiraceae	0.00284542	0.678766	0.341706	0.111601	0.494654	0.0516008	0.160252	0.00103297	0.809948	0.712947	0.82447	0.00592902	0.180245	0.0891411	0.0594839	0.00467685	0.121049	0.0559601	0.070926	0.212987	0.00352507	0.0475742	0.108564	0.0873932	0.0412516	0.0590184	0.180172	0.138836	0.463738	0.12783	0.703447	0.0436706	0.419504	0.00751769	0.265064	0.000117663	0.00153461	6.20995e-05	0.396172	0.0886029	0	0.000549799	0.305221	0.0182026	3.40116e-05	0.538741	0.0119538
Oscillospira	0.000306973	0.0164326	0.0951585	0.232949	0.119301	0.810362	0.769019	0.662742	0.0196388	0.0773666	0.676045	0.261116	0.441122	0.379911	0.183247	0.0455389	0.0619497	0.114061	0.849051	0.0634457	0.0566599	0.0379312	0.0187157	0.117086	0.145827	0.639348	0.231537	0.112512	0.231739	0.875713	0.888098	0.252144	0.120937	0.593855	0.00047427	0.00950181	0.108248	0.00588023	0.188163	0.393263	0.000549799	0	0.959393	0.124464	0.0183084	0.61879	0.00381958
Pediococcus	0.23587	0.737065	0.927698	0.0451588	0.369362	0.795036	0.0962636	0.282474	0.928941	0.548413	0.98783	0.502271	0.29915	0.585653	0.409601	0.0598013	0.157897	0.0591366	0.45726	0.544491	0.660798	0.0977337	0.607709	0.743277	0.554715	0.341567	0.24448	0.727044	0.242067	0.225633	0.294739	0.422311	0.717055	0.838764	0.787712	0.0628388	0.111302	0.336055	0.0261024	0.00246537	0.305221	0.959393	0	0.00465595	0.815334	0.00910096	0.159559
Propionibacterium	0.200249	0.48878	0.888641	0.29284	0.563178	0.0844972	0.000583307	0.43887	0.838972	0.450539	0.0925659	0.557799	0.101415	0.239837	0.149684	0.0230176	0.521133	0.0264991	0.838627	0.768214	0.816588	0.489618	0.0349608	0.752385	0.965122	0.264586	0.03488	0.572499	0.268839	0.722028	0.851772	0.000102602	0.644589	0.153318	0.88997	0.016518	0.582138	0.494579	0.00144509	6.74231e-05	0.0182026	0.124464	0.00465595	0	0.0502765	0.000525684	0.11101
Ruminococcus	0.0114427	0.20429	0.125102	0.0423403	0.0278808	0.307538	0.00577335	0.00105482	0.393508	0.0591833	0.00129166	0.0128539	0.672965	0.0130448	0.0717955	0.00238084	0.272012	0.023764	0.0394983	0.0959902	0.00675006	0.00158885	0.187825	0.155817	0.169381	0.052003	0.0395875	0.0574683	0.0876442	0.231559	0.171629	0.019733	0.0974827	0.416888	0.215944	0.000187199	0.00249467	0.00676833	0.377513	0.540555	3.40116e-05	0.0183084	0.815334	0.0502765	0	0.964623	0.0085219
Schlegelella	0.638216	0.550724	0.179522	0.105595	0.301108	0.64473	0.00185396	0.417491	0.938933	0.406478	0.786203	0.68584	0.119762	0.336282	0.584332	0.554789	0.314683	0.425123	0.0632277	0.535942	0.708252	0.444244	0.119268	0.0645893	0.0849005	0.330163	0.692537	0.112744	0.255337	0.226925	0.589208	1.68323e-06	0.610228	0.832273	0.545766	0.060167	0.17708	0.760378	0.000768426	0.00146378	0.538741	0.61879	0.00910096	0.000525684	0.964623	0	0.60677
Others	0.000119751	0.947808	0.744991	0.270263	0.208155	0.866016	0.425468	0.423156	0.477025	0.224817	0.22277	0.0530721	0.631691	0.348659	0.27711	9.0849e-05	1.15499e-05	0.000598625	0.235247	0.0510613	0.192538	0.00730105	0.000525788	0.110921	0.0197955	0.22294	0.0473808	0.018747	0.106808	0.327801	0.663989	0.574472	0.175451	0.1752	7.7427e-05	2.81488e-07	0.000550415	1.55407e-06	0.837832	0.0485408	0.0119538	0.00381958	0.159559	0.11101	0.0085219	0.60677	0
SPECIES
Spearman's Correlation																Spearman Correlation																Spearman Correlation																Spearman Correlation
	1-Propanol	2,3-Butanedione	2,4-Pentanedione	2,6 bis Phenol	2,6-Dimethyl-4-heptanone	2-Octanol	2-Pentanone	2-Undecanone	3-Hydroxy-2-butanone	3-Methyl-3-buten-2-one	3-Methylbutyl butyrate	4-Methylphenol	6-Methyl-5-hepten-2-one	Butyl propanoate	Dodecane	Ethanol	Ethyl acetate	Ethyl butyrate	Ethyl decanoate	Ethyl octanoate	Ethyl propionate	Heptanal	Hexanal	Nonanal	Octanal	Phenol	Propyl butyrate	Propyl propionate	Pyridine	Tetradecane	Tridecane	Alistipes putredinis	Bifidobacterium	Clostridiaceae	Clostridium	Clostridium sp.	Clostridium difficile	Coprobacillus	Dialister invisus	Dorea formicigenerans	Eggerthella	Eggerthella lenta	Erysipelotrichaceae	Eubacterium	Faecalibacterium prausnitzii	Gemella sanguinis	Geobacillus	Janibacter	Lachnospiraceae
1-Propanol	1	0	0.28498	0	0.271303	0	0	0	0	0.333665	0	0	0	0	0.2872	0.592051	0.284044	0	0	0	0.332437	0.279719	0.391409	0	0	-0.277674	0.302922	0.285155	0	0	0	-0.264604	0	0	-0.282483	-0.41466	0.303919	0	0	-0.400992	0	-0.26865	-0.28128	-0.307226	-0.420855	0	0	0.26646	-0.381814
2,3-Butanedione	0	1	0	0	0.524021	0	0	0	0.62367	0.379544	0.269784	0	0.285272	0	0	0	0	0	0.266569	0	0	0.335243	0	0.373349	0	0	0	0	0.288077	0	0.279895	0	0	-0.377843	0	0	0	0	0	0	0	0	0	0	0	0	0	0	0
2,4-Pentanedione	0.28498	0	1	0	0.303214	0	0	0	0.268089	0	0.274693	0	0	0	0	0	0	0	0	0	0.304968	0.339743	0	0	0	0	0	0	0	0	0	0	0	0	-0.293004	-0.285861	0	0	0	0	0	0	0	0	0	0	0	0	0
2,6 bis Phenol	0	0	0	1	0.332262	0	-0.290006	0	0	0	0	-0.37405	0	0.305143	0	0	0	0	0	0.268089	0.356809	0.317183	0	0	0.428054	0	0	0.304793	0	0	0	0	0	0	-0.367	-0.262123	0.292018	-0.271138	-0.298076	-0.330288	0	0	0	-0.305193	0	0	0	0	0
2,6-Dimethyl-4-heptanone	0.271303	0.524021	0.303214	0.332262	1	0	0	0	0.342373	0.383109	0.355348	0	0	0.324138	0.327002	0.357101	0	0	0	0.339918	0.431093	0.26803	0	0.361309	0.272648	0	0	0.396259	0.259906	0	0.398773	0	0	0	0	0	0	0	0	0	0	0	0	0	0	0	0	0	0
2-Octanol	0	0	0	0	0	1	0.295675	0	0	0.27668	0	0	0	0	0	0	0	0	0	0	0	0	0	0	0	0	-0.368381	0	0	0	0	0	0	0	0	0.30061	0	0	0	0.280654	0.277105	0	0	0	0	0	0	0	0
2-Pentanone	0	0	0	-0.290006	0	0.295675	1	0.272122	0	0	0	0	0	0	0	-0.28422	0	0	0	0	0	0	0	0	0	0	0	0	0	0	0	0	0.346177	0	0	0.317297	-0.34579	0	0	0.315332	0	0	0	0	0	0	-0.412518	-0.289083	0
2-Undecanone	0	0	0	0	0	0	0.272122	1	0	0	0	0.30941	0	0	0	0	0	0	0	0	0	0	0	0	0	0.271888	0	0	0	0	0	0	0	0	0.306739	0	0	0	0	0.306709	0	0	0	0	0	0	0	0	0.416519
3-Hydroxy-2-butanone	0	0.62367	0.268089	0	0.342373	0	0	0	1	0	0	0	0	0	0	0.315956	0.359673	0	0	0	0	0	0	0.375687	0	0	0	0	0.260023	0	0.309819	0	0	0	-0.291016	-0.279163	0	0	-0.273046	0	0	0	0	0	0	0	-0.256501	0	0
3-Methyl-3-buten-2-one	0.333665	0.379544	0	0	0.383109	0.27668	0	0	0	1	0.27218	0	0	0	0	0	0	0	0	0.399123	0.423027	0	0	0	0	0	0	0.322034	0.304267	0	0	0	0	-0.299503	0	0	0	0	0	0	0	0	0	0	0	0	0	0	0
3-Methylbutyl butyrate	0	0.269784	0.274693	0	0.355348	0	0	0	0	0.27218	1	0	0	0.2955	0.342957	0	0	0.421859	0.387726	0	0.286324	0	0	0	0	0	0	0.294214	0.27142	0	0.317826	0	0	0	-0.264714	0	0	0	0	0	-0.356544	0	0	0	0	0	0	0	0
4-Methylphenol	0	0	0	-0.37405	0	0	0	0.30941	0	0	0	1	0	0	0	0	0	0	0	-0.281181	0	-0.368673	0	-0.284746	-0.373583	0.263355	0	0	-0.291233	0	0	0	0	0	0.432404	0.391215	0	0	0	0.406103	0	0.292729	0	0.314702	0	0	0	0	0.354126
6-Methyl-5-hepten-2-one	0	0.285272	0	0	0	0	0	0	0	0	0	0	1	0	0	0	0	0	0.349737	0	0	0.414202	0	0	0.383343	0	0	0	0	0	0	0	0	0	0	0	0	0	0	0	0	0	0	0	0	0	0	0	0
Butyl propanoate	0	0	0	0.305143	0.324138	0	0	0	0	0	0.2955	0	0	1	0.328521	0.291876	0	0.260257	0	0	0.43495	0.32332	0	0.336119	0	0	0	0.485155	0	0.295909	0.279486	0	0	0	0	0	0	0	0	-0.397292	0	0	0	-0.432641	0	0	0	0	0
Dodecane	0.2872	0	0	0	0.327002	0	0	0	0	0	0.342957	0	0	0.328521	1	0	0	0	0	0	0.394155	0.323027	0.338457	0.423086	0.287551	0	0	0	0.309293	0.490357	0.41502	0	0	0	-0.291484	0	0	0	0	-0.305173	0	0	0	0	-0.295423	0	0	0	0
Ethanol	0.592051	0	0	0	0.357101	0	-0.28422	0	0.315956	0	0	0	0	0.291876	0	1	0.316423	0	0	0	0.256692	0	0.396084	0	0	0	0.309351	0.305552	0.25675	0	0	-0.40311	-0.325119	0	-0.318312	-0.539816	0.544388	0	0	-0.472323	0	-0.281509	0	-0.392152	-0.361743	0	0	0	-0.363336
Ethyl acetate	0.284044	0	0	0	0	0	0	0	0.359673	0	0	0	0	0	0	0.316423	1	0.350555	0	0	0	0.292168	0.329515	0.268323	0	0	0	0.412215	0	0	0	0	0	0	0	0	0.291803	0	-0.290807	-0.333988	0	0	0	-0.425105	0	0	0	0	0
Ethyl butyrate	0	0	0	0	0	0	0	0	0	0	0.421859	0	0	0.260257	0	0	0.350555	1	0.376797	0.354646	0.261952	0.391642	0.319404	0.266803	0.346289	0	0.410169	0.292753	0.314202	0	0.283109	-0.326324	-0.340272	0	0	0	0	0	0	-0.311695	0	-0.373871	0	0	-0.36403	0	0	0.360169	0
Ethyl decanoate	0	0.266569	0	0	0	0	0	0	0	0	0.387726	0	0.349737	0	0	0	0	0.376797	1	0.318235	0	0.352718	0	0	0	0	0	0	0.300292	0	0	0	0	0	0	0	0	0	0	0	0	-0.274157	0	0	0	0	0	0	0
Ethyl octanoate	0	0	0	0.268089	0.339918	0	0	0	0	0.399123	0	-0.281181	0	0	0	0	0	0.354646	0.318235	1	0	0.345061	0.327937	0.334132	0.372764	0	0	0.449795	0.47066	0	0	0	0	-0.297866	0	0	0	0	-0.264071	0	0	0	0	0	-0.276089	0	0	0	0
Ethyl propionate	0.332437	0	0.304968	0.356809	0.431093	0	0	0	0	0.423027	0.286324	0	0	0.43495	0.394155	0.256692	0	0.261952	0	0	1	0.344302	0.371362	0	0.393805	0	0	0.540736	0	0.366511	0	0	0	0	0	0	0.286927	0	0	0	0	-0.276705	0	-0.261474	-0.277821	0	0	0	-0.373979
Heptanal	0.279719	0.335243	0.339743	0.317183	0.26803	0	0	0	0	0	0	-0.368673	0.414202	0.32332	0.323027	0	0.292168	0.391642	0.352718	0.345061	0.344302	1	0.371011	0.454588	0.569608	0	0.260959	0.284921	0.37481	0.382466	0.257218	0	-0.272864	0	0	-0.272464	0	0	0	-0.436109	-0.285565	-0.382074	0	-0.29694	-0.303254	0	0	0	-0.259045
Hexanal	0.391409	0	0	0	0	0	0	0	0	0	0	0	0	0	0.338457	0.396084	0.329515	0.319404	0	0.327937	0.371362	0.371011	1	0.345295	0.543308	0	0	0.443542	0.377849	0.369316	0	-0.300379	0	0	0	-0.410841	0.41469	0	-0.551655	-0.348881	0	-0.324131	0	0	-0.424459	-0.298056	0	0	0
Nonanal	0	0.373349	0	0	0.361309	0	0	0	0.375687	0	0	-0.284746	0	0.336119	0.423086	0	0.268323	0.266803	0	0.334132	0	0.454588	0.345295	1	0.509877	0	0	0.353068	0.351257	0	0.40678	-0.29776	0	0	-0.267345	0	0	0	0	-0.26529	0	-0.31962	0	-0.296521	0	0	0	0	0
Octanal	0	0	0	0.428054	0.272648	0	0	0	0	0	0	-0.373583	0.383343	0	0.287551	0	0	0.346289	0	0.372764	0.393805	0.569608	0.543308	0.509877	1	0	0	0	0.45149	0.332788	0.312566	0	-0.276318	0	-0.277573	0	0	-0.278734	-0.358626	-0.461475	-0.270366	-0.404747	0	0	0	0	0	0	-0.266589
Phenol	-0.277674	0	0	0	0	0	0	0.271888	0	0	0	0.263355	0	0	0	0	0	0	0	0	0	0	0	0	0	1	0	0	0	0	0	0	0	0	0	0.376878	0	0	0	0	0	0.318361	0	0	0.258903	0	0	-0.263331	0
Propyl butyrate	0.302922	0	0	0	0	-0.368381	0	0	0	0	0	0	0	0	0	0.309351	0	0.410169	0	0	0	0.260959	0	0	0	0	1	0	0	0.332496	0	0	0	0.31558	0	-0.36354	0.328654	0	-0.259521	-0.350668	0	-0.378324	-0.323234	-0.281749	-0.341646	0	0	0	0
Propyl propionate	0.285155	0	0	0.304793	0.396259	0	0	0	0	0.322034	0.294214	0	0	0.485155	0	0.305552	0.412215	0.292753	0	0.449795	0.540736	0.284921	0.443542	0.353068	0	0	0	1	0.296786	0	0	0	0	0	0	-0.269409	0	0	-0.30901	0	-0.263483	0	0	-0.289643	0	0	0	0	0
Pyridine	0	0.288077	0	0	0.259906	0	0	0	0.260023	0.304267	0.27142	-0.291233	0	0	0.309293	0.25675	0	0.314202	0.300292	0.47066	0	0.37481	0.377849	0.351257	0.45149	0	0	0.296786	1	0	0.290649	0	0	0	0	0	0	0	0	0	0	0	0	0	-0.282811	0	0	0	0
Tetradecane	0	0	0	0	0	0	0	0	0	0	0	0	0	0.295909	0.490357	0	0	0	0	0	0.366511	0.382466	0.369316	0	0.332788	0	0.332496	0	0	1	0	0	0	0	0	-0.278693	0.378698	0	-0.287394	-0.364558	0	-0.287163	0	0	-0.34823	0	0	0	0
Tridecane	0	0.279895	0	0	0.398773	0	0	0	0.309819	0	0.317826	0	0	0.279486	0.41502	0	0	0.283109	0	0	0	0.257218	0	0.40678	0.312566	0	0	0	0.290649	0	1	0	0	0	0	0	0	0	0	0	0	0	0	0	0	0	0	0	0
Alistipes putredinis	-0.264604	0	0	0	0	0	0	0	0	0	0	0	0	0	0	-0.40311	0	-0.326324	0	0	0	0	-0.300379	-0.29776	0	0	0	0	0	0	0	1	0.527089	-0.353258	0.343586	0.448205	-0.341151	0	0.441081	0.487565	0.380391	0	0	0.381663	0.414775	0	0	0	0.385259
Bifidobacterium	0	0	0	0	0	0	0.346177	0	0	0	0	0	0	0	0	-0.325119	0	-0.340272	0	0	0	-0.272864	0	0	-0.276318	0	0	0	0	0	0	0.527089	1	0	0	0.326526	0	0	0	0.39522	0.268711	0	0	0	0.349564	0	0	0	0.262747
Clostridiaceae	0	-0.377843	0	0	0	0	0	0	0	-0.299503	0	0	0	0	0	0	0	0	0	-0.297866	0	0	0	0	0	0	0.31558	0	0	0	0	-0.353258	0	1	0	0	0	0	0	0	0	0	0	0	0	0	0	0	-0.344637
Clostridium	-0.282483	0	-0.293004	-0.367	0	0	0	0.306739	-0.291016	0	-0.264714	0.432404	0	0	-0.291484	-0.318312	0	0	0	0	0	0	0	-0.267345	-0.277573	0	0	0	0	0	0	0.343586	0	0	1	0.54972	0	0	0	0.542119	0.34201	0.331357	0	0.551688	0.30944	0	0	0	0.486192
Clostridium sp.	-0.41466	0	-0.285861	-0.262123	0	0.30061	0.317297	0	-0.279163	0	0	0.391215	0	0	0	-0.539816	0	0	0	0	0	-0.272464	-0.410841	0	0	0.376878	-0.36354	-0.269409	0	-0.278693	0	0.448205	0.326526	0	0.54972	1	-0.526403	0	0.374465	0.67225	0.392405	0.447735	0	0.533509	0.442132	0.262135	0	0	0.517576
Clostridium difficile	0.303919	0	0	0.292018	0	0	-0.34579	0	0	0	0	0	0	0	0	0.544388	0.291803	0	0	0	0.286927	0	0.41469	0	0	0	0.328654	0	0	0.378698	0	-0.341151	0	0	0	-0.526403	1	0	-0.461023	-0.592293	-0.370449	-0.345333	0	-0.357732	-0.451408	0	0.416026	0	-0.310208
Coprobacillus	0	0	0	-0.271138	0	0	0	0	0	0	0	0	0	0	0	0	0	0	0	0	0	0	0	0	-0.278734	0	0	0	0	0	0	0	0	0	0	0	0	1	0.351233	0.380855	0	0.373918	0.259851	0	0.290397	0	0	0	0
Dialister invisus	0	0	0	-0.298076	0	0	0	0	-0.273046	0	0	0	0	0	0	0	-0.290807	0	0	-0.264071	0	0	-0.551655	0	-0.358626	0	-0.259521	-0.30901	0	-0.287394	0	0.441081	0	0	0	0.374465	-0.461023	0.351233	1	0.398961	0.433963	0.328892	0	0.289366	0.363475	0.324135	0	0	0
Dorea formicigenerans	-0.400992	0	0	-0.330288	0	0.280654	0.315332	0.306709	0	0	0	0.406103	0	-0.397292	-0.305173	-0.472323	-0.333988	-0.311695	0	0	0	-0.436109	-0.348881	-0.26529	-0.461475	0	-0.350668	0	0	-0.364558	0	0.487565	0.39522	0	0.542119	0.67225	-0.592293	0.380855	0.398961	1	0.587062	0.503639	0	0.685105	0.386459	0	-0.277646	-0.261194	0.480423
Eggerthella	0	0	0	0	0	0.277105	0	0	0	0	-0.356544	0	0	0	0	0	0	0	0	0	0	-0.285565	0	0	-0.270366	0	0	-0.263483	0	0	0	0.380391	0.268711	0	0.34201	0.392405	-0.370449	0	0.433963	0.587062	1	0.325317	0	0.367196	0	0	0	0	0.257628
Eggerthella lenta	-0.26865	0	0	0	0	0	0	0	0	0	0	0.292729	0	0	0	-0.281509	0	-0.373871	-0.274157	0	-0.276705	-0.382074	-0.324131	-0.31962	-0.404747	0.318361	-0.378324	0	0	-0.287163	0	0	0	0	0.331357	0.447735	-0.345333	0.373918	0.328892	0.503639	0.325317	1	0.486398	0.377064	0.341605	0	0	-0.269973	0.384541
Erysipelotrichaceae	-0.28128	0	0	0	0	0	0	0	0	0	0	0	0	0	0	0	0	0	0	0	0	0	0	0	0	0	-0.323234	0	0	0	0	0	0	0	0	0	0	0.259851	0	0	0	0.486398	1	0	0	0.272193	0	0	0
Eubacterium	-0.307226	0	0	-0.305193	0	0	0	0	0	0	0	0.314702	0	-0.432641	0	-0.392152	-0.425105	0	0	0	-0.261474	-0.29694	0	-0.296521	0	0	-0.281749	-0.289643	0	0	0	0.381663	0	0	0.551688	0.533509	-0.357732	0	0.289366	0.685105	0.367196	0.377064	0	1	0.321309	0	0	0	0.452698
Faecalibacterium prausnitzii	-0.420855	0	0	0	0	0	0	0	0	0	0	0	0	0	-0.295423	-0.361743	0	-0.36403	0	-0.276089	-0.277821	-0.303254	-0.424459	0	0	0.258903	-0.341646	0	-0.282811	-0.34823	0	0.414775	0.349564	0	0.30944	0.442132	-0.451408	0.290397	0.363475	0.386459	0	0.341605	0	0.321309	1	0	0	-0.312765	0.46808
Gemella sanguinis	0	0	0	0	0	0	0	0	0	0	0	0	0	0	0	0	0	0	0	0	0	0	-0.298056	0	0	0	0	0	0	0	0	0	0	0	0	0.262135	0	0	0.324135	0	0	0	0.272193	0	0	1	0	0	0
Geobacillus	0	0	0	0	0	0	-0.412518	0	-0.256501	0	0	0	0	0	0	0	0	0	0	0	0	0	0	0	0	0	0	0	0	0	0	0	0	0	0	0	0.416026	0	0	-0.277646	0	0	0	0	0	0	1	0	0
Janibacter	0.26646	0	0	0	0	0	-0.289083	0	0	0	0	0	0	0	0	0	0	0.360169	0	0	0	0	0	0	0	-0.263331	0	0	0	0	0	0	0	0	0	0	0	0	0	-0.261194	0	-0.269973	0	0	-0.312765	0	0	1	0
Lachnospiraceae	-0.381814	0	0	0	0	0	0	0.416519	0	0	0	0.354126	0	0	0	-0.363336	0	0	0	0	-0.373979	-0.259045	0	0	-0.266589	0	0	0	0	0	0	0.385259	0.262747	-0.344637	0.486192	0.517576	-0.310208	0	0	0.480423	0.257628	0.384541	0	0.452698	0.46808	0	0	0	1
Lactobacillus zeae	0	0	0	0	0	0	0	0	0	0	0	0	0	0	0	0.278705	0	0	0	0	0	0	0	0	0	0	0	0	0	0	0.334427	0	0	0	0	0	0.299206	0	0	-0.288913	0	0	0	0	-0.294078	0	0	0	0
Oscillospira	-0.453743	-0.311204	0	0	0	0	0	0	-0.303057	0	0	0	0	0	0	-0.261379	0	0	0	0	0	-0.27094	-0.305279	0	0	0	0	0	0	0	0	0.503568	0.260823	0	0.385762	0.308201	0	0.285385	0.43827	0.334989	0	0	0	0.356484	0.363969	0	0	0	0.436393
Parvimonas micra	0	0	0	0	0	0	0	0	0	0	0	0	0	0	0	0	0	-0.274786	0	0	0	0	-0.281057	0	-0.312036	0	0	0	0	0	0	0.440212	0.321051	-0.259783	0	0	-0.330583	0.26324	0.341566	0.350818	0.293221	0	0	0	0.323162	0	0	-0.26953	0.278586
Propionibacterium acnes	0	0	0	0	0	0	-0.431546	0	0	0	0	0	0	0	0	0.323314	0	0.323079	0	0	0	0	0.290482	0	0	0	0.27136	0	0	0	0	-0.425265	-0.258207	0	0	0	0.410473	0	0	-0.32171	0	0	0	0	-0.413042	0	0.409685	0.500853	-0.305113
Propionibacterium granulosum	0	0	-0.279437	0.272418	0	0	-0.419156	0	0	0	0	0	0	0	0	0	0	0	0	0	0	0	0.26629	0.305955	0.286457	0	0	0	0	0	0	0	0	0	0	0	0.306981	0	0	-0.306815	0	0	0	0	0	0	0.509628	0.415412	0
Ruminococcus	-0.507264	0	-0.258597	-0.268704	0	0	0.268645	0.275813	0	0	-0.281102	0.264884	0	-0.309717	-0.528358	-0.402497	-0.27787	-0.281924	0	0	-0.346676	-0.369181	-0.434579	-0.381873	-0.368006	0.287918	-0.302549	-0.287918	-0.321116	-0.270466	-0.266764	0.337105	0.347473	0	0.508234	0.578509	-0.461026	0	0.330111	0.63934	0.308864	0.388716	0.288717	0.535493	0.500934	0	0	0	0.468723
Ruminococcus bromii	0	0	-0.308138	0	0	0	0	0	0	-0.303821	-0.26047	0.278468	0	0	0	0	0	0	0	0	0	-0.288074	0	0	0	0	-0.291175	0	0	0	0	0	0	0	0.38331	0.441029	0	0	0.42338	0.420903	0.405222	0	0	0.517022	0	0	0	0	0
Ruminococcus obeum	0	0	-0.313323	0	0	0	0	0	0	0	0	0	0	-0.336814	0	0	0	-0.470195	0	0	-0.305149	0	0	0	0	0	0	0	0	0	0	0.299386	0.473231	0	0	0.315617	-0.297301	0	0	0.387674	0	0	0	0.413254	0.431882	0	0	0	0.349846
Schlegelella thermodepolymerans	0	0	0	0	0	0	-0.39694	0	0	0	0	0	0	0	0	0	0	0	0	0	0	0	0	0	0	0	0	0	0	0	0	0	0	0	0	0	0.318481	0	0	0	0	0	0	0	0	0	0.425993	0.404992	0
Solobacterium moorei	0	0	0	0	0	0	0	0	0	0	0	0	0	0	0	0	0	0	0	0	0	0	0	0	0	0	0	0	0	-0.286644	0	0	0	0	0	0	-0.311755	0	0	0.29106	0	0	0	0	0	0	0	0	0
Staphylococcus	0	0	-0.308087	0	0	0	-0.311925	0	0	0	0	0	0	0	0	0.257032	0.335168	0	0	0	0	0	0	0	0	0	0	0	0	0	0	0	0	0	0	0	0.343909	0	0	0	0	0	0	0	-0.291593	0	0.413276	0.475987	0
Streptococcus infantis	-0.353824	0	0	-0.369108	0	0	0	0	0	0	0	0	0	0	-0.263197	-0.410517	-0.325276	-0.309049	0	0	0	-0.31558	-0.384594	0	-0.391328	0	0	0	0	-0.354161	0	0.301769	0.427431	0	0.365225	0.475401	-0.482444	0	0.294971	0.640251	0.353264	0.290865	0	0.517777	0.440531	0.292345	0	0	0.289402
Other	-0.48159	0	0	0	0	0	0	0	0	0	0	0.259906	0	0	0	-0.491175	-0.523612	-0.424605	0	-0.257218	0	-0.347458	-0.432496	0	-0.298422	0	0	-0.30526	0	0	0	0.542301	0.394198	0	0.485242	0.491575	-0.359914	0	0.429163	0.612384	0.449534	0.344871	0	0.520437	0.433399	0.337633	0	0	0.334566
SPECIES
p-values
	1-Propanol	2,3-Butanedione	2,4-Pentanedione	2,6 bis Phenol	2,6-Dimethyl-4-heptanone	2-Octanol	2-Pentanone	2-Undecanone	3-Hydroxy-2-butanone	3-Methyl-3-buten-2-one	3-Methylbutyl butyrate	4-Methylphenol	6-Methyl-5-hepten-2-one	Butyl propanoate	Dodecane	Ethanol	Ethyl acetate	Ethyl butyrate	Ethyl decanoate	Ethyl octanoate	Ethyl propionate	Heptanal	Hexanal	Nonanal	Octanal	Phenol	Propyl butyrate	Propyl propionate	Pyridine	Tetradecane	Tridecane	Alistipes putredinis	Bifidobacterium	Clostridiaceae	Clostridium	Clostridium sp.	Clostridium difficile	Coprobacillus	Dialister invisus	Dorea formicigenerans	Eggerthella	Eggerthella lenta	Erysipelotrichaceae	Eubacterium	Faecalibacterium prausnitzii	Gemella sanguinis	Geobacillus	Janibacter	Lachnospiraceae
1-Propanol	0	0.428821	0.0286901	0.597919	0.0376641	0.355789	0.211252	0.101477	0.0731812	0.00980698	0.656013	0.300828	0.161413	0.146057	0.0274176	7.853e-07	0.0292406	0.42213	0.352098	0.207993	0.0100972	0.0319027	0.00217342	0.102431	0.178503	0.0332306	0.0196959	0.0285879	0.0890085	0.188127	0.704408	0.0428438	0.173733	0.368046	0.0301794	0.00109362	0.019276	0.404687	0.083681	0.00164732	0.0977022	0.0396502	0.0309195	0.0179371	0.000903115	0.110805	0.335792	0.0413531	0.00284542
2,3-Butanedione	0.428821	0	0.0862964	0.0611936	2.04904e-05	0.170081	0.839132	0.148073	1.31562e-07	0.0030292	0.0387911	0.460734	0.0285199	0.425983	0.238975	0.117583	0.0680406	0.789321	0.041267	0.101858	0.353941	0.00944444	0.650612	0.00358547	0.0792507	0.817891	0.0571061	0.423412	0.0269284	0.635771	0.031791	0.73344	0.711707	0.00317377	0.225474	0.501989	0.700204	0.433524	0.681224	0.645165	0.466173	0.475955	0.633049	0.91051	0.76644	0.423995	0.0808389	0.342734	0.678766
2,4-Pentanedione	0.0286901	0.0862964	0	0.13043	0.019572	0.502872	0.429855	0.906269	0.0400808	0.125214	0.0352477	0.124991	0.118436	0.546321	0.0613849	0.464238	0.243467	0.174898	0.116945	0.11737	0.0188425	0.0084737	0.730388	0.31242	0.345922	0.317998	0.0957175	0.0808286	0.439754	0.272988	0.0583207	0.393273	0.0772242	0.592006	0.0243142	0.0281792	0.315032	0.171301	0.231789	0.24611	0.0785461	0.432499	0.764788	0.116475	0.152028	0.526238	0.632685	0.276082	0.341706
2,6 bis Phenol	0.597919	0.0611936	0.13043	0	0.0101393	0.993691	0.0258781	0.575456	0.162359	0.448452	0.18858	0.00351825	0.445014	0.0187708	0.681664	0.14221	0.292576	0.586032	0.855657	0.0400808	0.00553703	0.0143744	0.0574078	0.0571664	0.000719716	0.889579	0.882638	0.0189144	0.206055	0.13345	0.228776	0.769563	0.607844	0.746585	0.00424757	0.0449054	0.0248195	0.0377857	0.0218497	0.0106235	0.144247	0.114676	0.871602	0.0187505	0.0556549	0.234928	0.760175	0.656076	0.111601
2,6-Dimethyl-4-heptanone	0.0376641	2.04904e-05	0.019572	0.0101393	0	0.103488	0.918466	0.824387	0.00794758	0.00274508	0.00574761	0.487777	0.161548	0.0122625	0.011474	0.00549573	0.0610664	0.466672	0.262767	0.0084377	0.000652955	0.0401259	0.256722	0.0049304	0.03669	0.104165	0.484455	0.00189086	0.0468146	0.0982863	0.00175779	0.504623	0.386765	0.616618	0.0628513	0.794008	0.165925	0.825377	0.063785	0.12948	0.085755	0.725951	0.237319	0.071725	0.231595	0.692144	0.489384	0.585659	0.494654
2-Octanol	0.355789	0.170081	0.502872	0.993691	0.103488	0	0.0229885	0.0711465	0.230339	0.033892	0.681342	0.946758	0.376755	0.788644	0.749657	0.749324	0.680373	0.284673	0.164813	0.465048	0.884025	0.874666	0.727743	0.324294	0.78222	0.209781	0.00409499	0.608059	0.814476	0.143072	0.269487	0.446938	0.428873	0.0999581	0.47481	0.0207001	0.17753	0.290733	0.643913	0.0313112	0.033608	0.14588	0.169495	0.873543	0.812196	0.612689	0.455526	0.617592	0.0516008
2-Pentanone	0.211252	0.839132	0.429855	0.0258781	0.918466	0.0229885	0	0.0370686	0.517917	0.835011	0.227221	0.252806	0.449513	0.329784	0.162495	0.0291367	0.43115	0.959356	0.536091	0.583304	0.780532	0.531157	0.334887	0.190552	0.674251	0.111533	0.103295	0.813453	0.662071	0.465048	0.689108	0.311057	0.00723705	0.213584	0.0730171	0.0143374	0.00730673	0.287663	0.49208	0.0149866	0.099756	0.139157	0.410282	0.452483	0.062166	0.0622887	0.00116746	0.0263765	0.160252
2-Undecanone	0.101477	0.148073	0.906269	0.575456	0.824387	0.0711465	0.0370686	0	0.982825	0.488332	0.796439	0.0170973	0.322114	0.934872	0.60775	0.824387	0.953406	0.498094	0.559908	0.979672	0.608059	0.47347	0.838102	0.509657	0.628872	0.037238	0.764378	0.774463	0.546615	0.994742	0.329122	0.488035	0.326322	0.152562	0.0181292	0.0832625	0.0959044	0.237607	0.380135	0.0181411	0.0877142	0.132494	0.193704	0.511372	0.306258	0.847772	0.817623	0.958725	0.00103297
3-Hydroxy-2-butanone	0.0731812	1.31562e-07	0.0400808	0.162359	0.00794758	0.230339	0.517917	0.982825	0	0.107303	0.322985	0.0548549	0.42213	0.799495	0.274553	0.0147778	0.00514386	0.797458	0.672323	0.145431	0.816525	0.0514474	0.132398	0.00336574	0.141841	0.0745881	0.70049	0.310504	0.0467123	0.524516	0.0169437	0.567554	0.637539	0.127009	0.0253417	0.0322598	0.368996	0.880605	0.0364049	0.200697	0.816699	0.305093	0.807546	0.133453	0.888552	0.228759	0.0498781	0.791606	0.809948
3-Methyl-3-buten-2-one	0.00980698	0.0030292	0.125214	0.448452	0.00274508	0.033892	0.835011	0.488332	0.107303	0	0.0370264	0.819257	0.117051	0.183936	0.070645	0.0657158	0.41145	0.334664	0.124657	0.00173991	0.000843773	0.0638494	0.218715	0.235424	0.07886	0.153984	0.455104	0.0128711	0.0191315	0.966359	0.102718	0.507546	0.909975	0.0211956	0.477822	0.407668	0.367836	0.587275	0.488172	0.602354	0.588713	0.838404	0.730732	0.928356	0.936475	0.750253	0.186143	0.902102	0.712947
3-Methylbutyl butyrate	0.656013	0.0387911	0.0352477	0.18858	0.00574761	0.681342	0.227221	0.796439	0.322985	0.0370264	0	0.776485	0.779182	0.0230736	0.0078346	0.630124	0.340715	0.000875257	0.00241244	0.134389	0.0279141	0.0562682	0.315845	0.0741415	0.398445	0.380842	0.326922	0.0237058	0.0375786	0.437398	0.0141669	0.636082	0.168896	0.936951	0.0427539	0.597797	0.295443	0.768882	0.204453	0.129112	0.00557468	0.0778471	0.742597	0.302888	0.123373	0.822973	0.300735	0.190736	0.82447
4-Methylphenol	0.300828	0.460734	0.124991	0.00351825	0.487777	0.946758	0.252806	0.0170973	0.0548549	0.819257	0.776485	0	0.303543	0.286484	0.539005	0.0689468	0.602211	0.178939	0.125214	0.0309816	0.939066	0.00406334	0.192385	0.0288269	0.00356294	0.0438718	0.28287	0.559314	0.0252279	0.232959	0.075563	0.214632	0.141219	0.410051	0.000625927	0.00218541	0.31084	0.146286	0.142849	0.0014162	0.0843336	0.0244542	0.453687	0.0151998	0.119238	0.646344	0.339736	0.134093	0.00592902
6-Methyl-5-hepten-2-one	0.161413	0.0285199	0.118436	0.445014	0.161548	0.376755	0.449513	0.322114	0.42213	0.117051	0.779182	0.303543	0	0.355327	0.123437	0.320593	0.602519	0.948157	0.00662297	0.773116	0.139889	0.00110905	0.762366	0.122886	0.0027273	0.791353	0.370555	0.596389	0.550439	0.483627	0.063652	0.435892	0.710456	0.774736	0.492199	0.589819	0.541152	0.469269	0.444847	0.417233	0.604093	0.733909	0.939168	0.348807	0.942277	0.31072	0.391321	0.299592	0.180245
Butyl propanoate	0.146057	0.425983	0.546321	0.0187708	0.0122625	0.788644	0.329784	0.934872	0.799495	0.183936	0.0230736	0.286484	0.355327	0	0.0110736	0.0248928	0.115679	0.0465082	0.162631	0.335333	0.000576307	0.0124962	0.231559	0.0092481	0.0618972	0.320377	0.732374	9.84342e-05	0.123437	0.0228754	0.0320522	0.153404	0.336881	0.625022	0.483877	0.173989	0.0915225	0.714727	0.661085	0.00183513	0.0978154	0.700781	0.681034	0.000621154	0.265475	0.103968	0.837121	0.241243	0.0891411
Dodecane	0.0274176	0.238975	0.0613849	0.681664	0.011474	0.749657	0.162495	0.60775	0.274553	0.070645	0.0078346	0.539005	0.123437	0.0110736	0	0.379637	0.274749	0.119834	0.411955	0.336897	0.00200911	0.0125805	0.00874177	0.000842226	0.027221	0.383259	0.481146	0.169661	0.0171414	8.06554e-05	0.00108163	0.502486	0.422005	0.969853	0.0250967	0.0506048	0.099756	0.382142	0.314644	0.0187588	0.0543057	0.308262	0.867626	0.0729169	0.0231107	0.9212	0.224458	0.406589	0.0594839
Ethanol	7.853e-07	0.117583	0.464238	0.14221	0.00549573	0.749324	0.0291367	0.824387	0.0147778	0.0657158	0.630124	0.0689468	0.320593	0.0248928	0.379637	0	0.014623	0.284272	0.256535	0.157666	0.0497018	0.106118	0.00190047	0.219555	0.123327	0.225673	0.0171193	0.0186045	0.049648	0.220061	0.145807	0.00154771	0.0119873	0.979666	0.0140117	1.02297e-05	8.31152e-06	0.501019	0.0569135	0.000158748	0.248439	0.0307774	0.291662	0.00212782	0.00487513	0.0812976	0.958294	0.0983155	0.00467685
Ethyl acetate	0.0292406	0.0680406	0.243467	0.292576	0.0610664	0.680373	0.43115	0.953406	0.00514386	0.41145	0.340715	0.602211	0.602519	0.115679	0.274749	0.014623	0	0.00648846	0.0560306	0.0604964	0.217041	0.0247418	0.0108185	0.0399008	0.279881	0.872589	0.0886658	0.00117827	0.104262	0.766392	0.387876	0.200907	0.177565	0.973006	0.126649	0.0940874	0.0249309	0.722637	0.025452	0.00973181	0.141524	0.073683	0.149031	0.000790324	0.0906864	0.120149	0.407498	0.57411	0.121049
Ethyl butyrate	0.42213	0.789321	0.174898	0.586032	0.466672	0.284673	0.959356	0.498094	0.797458	0.334664	0.000875257	0.178939	0.948157	0.0465082	0.119834	0.284272	0.00648846	0	0.00326562	0.00585116	0.04505	0.00215898	0.0136684	0.0410826	0.00721702	0.261626	0.00125356	0.024442	0.015371	0.44607	0.0297998	0.0116566	0.00836554	0.40353	0.35184	0.256969	0.519499	0.800779	0.168084	0.0162547	0.115857	0.00353528	0.63385	0.066483	0.00459273	0.593584	0.51976	0.00507834	0.0559601
Ethyl decanoate	0.352098	0.041267	0.116945	0.855657	0.262767	0.164813	0.536091	0.559908	0.672323	0.124657	0.00241244	0.125214	0.00662297	0.162631	0.411955	0.256535	0.0560306	0.00326562	0	0.0140362	0.153333	0.00614442	0.606826	0.583304	0.0692275	0.305221	0.463158	0.0699334	0.0208411	0.711939	0.174327	0.953393	0.654422	0.415109	0.215016	0.461835	0.943716	0.600863	0.267551	0.162669	0.772191	0.0356212	0.39974	0.30654	0.0565699	0.114263	0.939827	0.49764	0.070926
Ethyl octanoate	0.207993	0.101858	0.11737	0.0400808	0.0084377	0.465048	0.583304	0.979672	0.145431	0.00173991	0.134389	0.0309816	0.773116	0.335333	0.336897	0.157666	0.0604964	0.00585116	0.0140362	0	0.372456	0.00743941	0.0112261	0.00969832	0.00364234	0.461272	0.447657	0.000351463	0.00016866	0.628247	0.0550299	0.308279	0.226422	0.0219472	0.104532	0.0884594	0.540077	0.270896	0.0432797	0.116604	0.374537	0.202543	0.926676	0.324104	0.0342908	0.456605	0.82116	0.843854	0.212987
Ethyl propionate	0.0100972	0.353941	0.0188425	0.00553703	0.000652955	0.884025	0.780532	0.608059	0.816525	0.000843773	0.0279141	0.939066	0.139889	0.000576307	0.00200911	0.0497018	0.217041	0.04505	0.153333	0.372456	0	0.00758007	0.00378212	0.0603704	0.00202945	0.362073	0.564373	9.8133e-06	0.104553	0.00430278	0.35049	0.514399	0.23171	0.303609	0.176452	0.301561	0.0275715	0.529714	0.0592234	0.0911589	0.135466	0.0338752	0.239824	0.0454571	0.0331333	0.994699	0.898316	0.439943	0.00352507
Heptanal	0.0319027	0.00944444	0.0084737	0.0143744	0.0401259	0.874666	0.531157	0.47347	0.0514474	0.0638494	0.0562682	0.00406334	0.00110905	0.0124962	0.0125805	0.106118	0.0247418	0.00215898	0.00614442	0.00743941	0.00758007	0	0.00381779	0.000298149	2.49742e-06	0.210924	0.0459002	0.0287243	0.0034467	0.00279449	0.0492196	0.0628916	0.0365354	0.138321	0.102602	0.0368217	0.0646688	0.810779	0.0561385	0.000554933	0.0283499	0.00282507	0.0913717	0.0223825	0.0195552	0.829877	0.931508	0.647335	0.0475742
Hexanal	0.00217342	0.650612	0.730388	0.0574078	0.256722	0.727743	0.334887	0.838102	0.132398	0.218715	0.315845	0.192385	0.762366	0.231559	0.00874177	0.00190047	0.0108185	0.0136684	0.606826	0.0112261	0.00378212	0.00381779	0	0.0073966	8.73165e-06	0.483075	0.0533564	0.000434057	0.00317321	0.00399446	0.364652	0.0208026	0.184559	0.0792388	0.534614	0.00122838	0.00109264	0.164377	5.93687e-06	0.00676632	0.176467	0.0122643	0.541977	0.335628	0.000806609	0.0218591	0.121101	0.330756	0.108564
Nonanal	0.102431	0.00358547	0.31242	0.0571664	0.0049304	0.324294	0.190552	0.509657	0.00336574	0.235424	0.0741415	0.0288269	0.122886	0.0092481	0.000842226	0.219555	0.0399008	0.0410826	0.583304	0.00969832	0.0603704	0.000298149	0.0073966	0	3.70866e-05	0.0986576	0.626059	0.00609016	0.00637508	0.209781	0.00138788	0.0219966	0.138444	0.889546	0.0406581	0.167485	0.475521	0.90876	0.123161	0.0422879	0.0785461	0.0136013	0.853072	0.0225816	0.0952103	0.964672	0.986213	0.510587	0.0873932
Octanal	0.178503	0.0792507	0.345922	0.000719716	0.03669	0.78222	0.674251	0.628872	0.141841	0.07886	0.398445	0.00356294	0.0027273	0.0618972	0.027221	0.123327	0.279881	0.00721702	0.0692275	0.00364234	0.00202945	2.49742e-06	8.73165e-06	3.70866e-05	0	0.30923	0.713251	0.0730343	0.00033169	0.0100136	0.0159429	0.0941896	0.0341362	0.603027	0.0332971	0.0564597	0.217282	0.0325366	0.00528457	0.000234375	0.0383564	0.0014745	0.835059	0.0659969	0.0595358	0.767694	0.64017	0.440344	0.0412516
Phenol	0.0332306	0.817891	0.317998	0.889579	0.104165	0.209781	0.111533	0.037238	0.0745881	0.153984	0.380842	0.0438718	0.791353	0.320377	0.383259	0.225673	0.872589	0.261626	0.305221	0.461272	0.362073	0.210924	0.483075	0.0986576	0.30923	0	0.994742	0.458585	0.517345	0.553095	0.645544	0.161348	0.0639169	0.296128	0.0956976	0.00325841	0.0726286	0.381927	0.771514	0.135289	0.837706	0.0139963	0.338165	0.844228	0.0477011	0.575759	0.45525	0.0438917	0.0590184
Propyl butyrate	0.0196959	0.0571061	0.0957175	0.882638	0.484455	0.00409499	0.103295	0.764378	0.70049	0.455104	0.326922	0.28287	0.370555	0.732374	0.481146	0.0171193	0.0886658	0.00125356	0.463158	0.447657	0.564373	0.0459002	0.0533564	0.626059	0.713251	0.994742	0	0.273379	0.724111	0.0100832	0.985629	0.0529202	0.453908	0.0149031	0.823693	0.00465198	0.0110392	0.222745	0.0471538	0.0064701	0.10196	0.00313226	0.012521	0.0306294	0.00809001	0.157726	0.468913	0.189341	0.180172
Propyl propionate	0.0285879	0.423412	0.0808286	0.0189144	0.00189086	0.608059	0.813453	0.774463	0.310504	0.0128711	0.0237058	0.559314	0.596389	9.84342e-05	0.169661	0.0186045	0.00117827	0.024442	0.0699334	0.000351463	9.8133e-06	0.0287243	0.000434057	0.00609016	0.0730343	0.458585	0.273379	0	0.0224557	0.948157	0.399685	0.340183	0.345047	0.847342	0.846345	0.0390735	0.101726	0.962254	0.0172484	0.081764	0.0437656	0.231204	0.471591	0.0260729	0.130187	0.446325	0.310531	0.492509	0.138836
Pyridine	0.0890085	0.0269284	0.439754	0.206055	0.0468146	0.814476	0.662071	0.546615	0.0467123	0.0191315	0.0375786	0.0252279	0.550439	0.123437	0.0171414	0.049648	0.104262	0.015371	0.0208411	0.00016866	0.104553	0.0034467	0.00317321	0.00637508	0.00033169	0.517345	0.724111	0.0224557	0	0.857037	0.0255358	0.839188	0.236069	0.1505	0.500314	0.239477	0.829709	0.400913	0.206538	0.0893445	0.527612	0.0784291	0.136751	0.505284	0.0299801	0.567192	0.815149	0.0852891	0.463738
Tetradecane	0.188127	0.635771	0.272988	0.13345	0.0982863	0.143072	0.465048	0.994742	0.524516	0.966359	0.437398	0.232959	0.483627	0.0228754	8.06554e-05	0.220061	0.766392	0.44607	0.711939	0.628247	0.00430278	0.00279449	0.00399446	0.209781	0.0100136	0.553095	0.0100832	0.948157	0.857037	0	0.115679	0.417418	0.840669	0.0513216	0.207157	0.0325637	0.00310034	0.0673958	0.0273089	0.0045296	0.085042	0.0274386	0.705939	0.0587891	0.00687716	0.453463	0.0735421	0.483175	0.12783
Tridecane	0.704408	0.031791	0.0583207	0.228776	0.00175779	0.269487	0.689108	0.329122	0.0169437	0.102718	0.0141669	0.075563	0.063652	0.0320522	0.00108163	0.145807	0.387876	0.0297998	0.174327	0.0550299	0.35049	0.0492196	0.364652	0.00138788	0.0159429	0.645544	0.985629	0.399685	0.0255358	0.115679	0	0.458877	0.524796	0.275786	0.350233	0.913123	0.964751	0.90628	0.988628	0.292228	0.195927	0.686121	0.346828	0.486113	0.432723	0.972911	0.211291	0.470599	0.703447
Alistipes putredinis	0.0428438	0.73344	0.393273	0.769563	0.504623	0.446938	0.311057	0.488035	0.567554	0.507546	0.636082	0.214632	0.435892	0.153404	0.502486	0.00154771	0.200907	0.0116566	0.953393	0.308279	0.514399	0.0628916	0.0208026	0.0219966	0.0941896	0.161348	0.0529202	0.340183	0.839188	0.417418	0.458877	0	1.79524e-05	0.00606101	0.00771457	0.000370993	0.00818844	0.249326	0.000471127	8.9792e-05	0.00295948	0.112879	0.813433	0.00285738	0.00108977	0.946447	0.226322	0.0714837	0.00258545
Bifidobacterium	0.173733	0.711707	0.0772242	0.607844	0.386765	0.428873	0.00723705	0.326322	0.637539	0.909975	0.168896	0.141219	0.710456	0.336881	0.422005	0.0119873	0.177565	0.00836554	0.654422	0.226422	0.23171	0.0365354	0.184559	0.138444	0.0341362	0.0639169	0.453908	0.345047	0.236069	0.840669	0.524796	1.79524e-05	0	0.583265	0.0573976	0.0116019	0.0976066	0.353757	0.303396	0.00194849	0.0396035	0.252551	0.906324	0.19529	0.00665177	0.883629	0.441771	0.254076	0.0443787
Clostridiaceae	0.368046	0.00317377	0.592006	0.746585	0.616618	0.0999581	0.213584	0.152562	0.127009	0.0211956	0.936951	0.410051	0.774736	0.625022	0.969853	0.979666	0.973006	0.40353	0.415109	0.0219472	0.303609	0.138321	0.0792388	0.889546	0.603027	0.296128	0.0149031	0.847342	0.1505	0.0513216	0.275786	0.00606101	0.583265	0	0.742575	0.25664	0.224402	0.545679	0.122217	0.199042	0.0776024	0.0500055	0.524068	0.672267	0.196786	0.743463	0.473857	0.328587	0.00751769
Clostridium	0.0301794	0.225474	0.0243142	0.00424757	0.0628513	0.47481	0.0730171	0.0181292	0.0253417	0.477822	0.0427539	0.000625927	0.492199	0.483877	0.0250967	0.0140117	0.126649	0.35184	0.215016	0.104532	0.176452	0.102602	0.534614	0.0406581	0.0332971	0.0956976	0.823693	0.846345	0.500314	0.207157	0.350233	0.00771457	0.0573976	0.742575	0	6.49835e-06	0.104062	0.126965	0.13095	9.21735e-06	0.00801847	0.0103589	0.466708	5.92767e-06	0.0170859	0.746878	0.53497	0.372537	9.46263e-05
Clostridium sp.	0.00109362	0.501989	0.0281792	0.0449054	0.794008	0.0207001	0.0143374	0.0832625	0.0322598	0.407668	0.597797	0.00218541	0.589819	0.173989	0.0506048	1.02297e-05	0.0940874	0.256969	0.461835	0.0884594	0.301561	0.0368217	0.00122838	0.167485	0.0564597	0.00325841	0.00465198	0.0390735	0.239477	0.0325637	0.913123	0.000370993	0.0116019	0.25664	6.49835e-06	0	1.84935e-05	0.147794	0.00347902	5.53481e-09	0.00211245	0.000376944	0.21057	1.35566e-05	0.000454956	0.0448947	0.810627	0.385494	2.69389e-05
Clostridium difficile	0.019276	0.700204	0.315032	0.0248195	0.165925	0.17753	0.00730673	0.0959044	0.368996	0.367836	0.295443	0.31084	0.541152	0.0915225	0.099756	8.31152e-06	0.0249309	0.519499	0.943716	0.540077	0.0275715	0.0646688	0.00109264	0.475521	0.217282	0.0726286	0.0110392	0.101726	0.829709	0.00310034	0.964751	0.00818844	0.0976066	0.224402	0.104062	1.84935e-05	0	0.0704062	0.000238142	7.75225e-07	0.00387565	0.00738974	0.137814	0.00540755	0.00033263	0.0504527	0.00104876	0.816739	0.0167988
Coprobacillus	0.404687	0.433524	0.171301	0.0377857	0.825377	0.290733	0.287663	0.237607	0.880605	0.587275	0.768882	0.146286	0.469269	0.714727	0.382142	0.501019	0.722637	0.800779	0.600863	0.270896	0.529714	0.810779	0.164377	0.90876	0.0325366	0.381927	0.222745	0.962254	0.400913	0.0673958	0.90628	0.249326	0.353757	0.545679	0.126965	0.147794	0.0704062	0	0.00637885	0.00292184	0.0798195	0.0035308	0.0468634	0.0842953	0.0256692	0.147808	0.401703	0.213458	0.344341
Dialister invisus	0.083681	0.681224	0.231789	0.0218497	0.063785	0.643913	0.49208	0.380135	0.0364049	0.488172	0.204453	0.142849	0.444847	0.661085	0.314644	0.0569135	0.025452	0.168084	0.267551	0.0432797	0.0592234	0.0561385	5.93687e-06	0.123161	0.00528457	0.771514	0.0471538	0.0172484	0.206538	0.0273089	0.988628	0.000471127	0.303396	0.122217	0.13095	0.00347902	0.000238142	0.00637885	0	0.00174815	0.000595103	0.0109778	0.932294	0.0262226	0.00465993	0.0122633	0.373058	0.382267	0.283888
Dorea formicigenerans	0.00164732	0.645165	0.24611	0.0106235	0.12948	0.0313112	0.0149866	0.0181411	0.200697	0.602354	0.129112	0.0014162	0.417233	0.00183513	0.0187588	0.000158748	0.00973181	0.0162547	0.162669	0.116604	0.0911589	0.000554933	0.00676632	0.0422879	0.000234375	0.135289	0.0064701	0.081764	0.0893445	0.0045296	0.292228	8.9792e-05	0.00194849	0.199042	9.21735e-06	5.53481e-09	7.75225e-07	0.00292184	0.00174815	0	1.02333e-06	4.77837e-05	0.176485	2.16259e-09	0.00249998	0.222683	0.0332489	0.0456974	0.000117663
Eggerthella	0.0977022	0.466173	0.0785461	0.144247	0.085755	0.033608	0.099756	0.0877142	0.816699	0.588713	0.00557468	0.0843336	0.604093	0.0978154	0.0543057	0.248439	0.141524	0.115857	0.772191	0.374537	0.135466	0.0283499	0.176467	0.0785461	0.0383564	0.837706	0.10196	0.0437656	0.527612	0.085042	0.195927	0.00295948	0.0396035	0.0776024	0.00801847	0.00211245	0.00387565	0.0798195	0.000595103	1.02333e-06	0	0.0119323	0.785633	0.00422561	0.386041	0.157837	0.134722	0.175183	0.0488466
Eggerthella lenta	0.0396502	0.475955	0.432499	0.114676	0.725951	0.14588	0.139157	0.132494	0.305093	0.838404	0.0778471	0.0244542	0.733909	0.700781	0.308262	0.0307774	0.073683	0.00353528	0.0356212	0.202543	0.0338752	0.00282507	0.0122643	0.0136013	0.0014745	0.0139963	0.00313226	0.231204	0.0784291	0.0274386	0.686121	0.112879	0.252551	0.0500055	0.0103589	0.000376944	0.00738974	0.0035308	0.0109778	4.77837e-05	0.0119323	0	9.38861e-05	0.00324199	0.00809825	0.0585734	0.512824	0.038649	0.00263785
Erysipelotrichaceae	0.0309195	0.633049	0.764788	0.871602	0.237319	0.169495	0.410282	0.193704	0.807546	0.730732	0.742597	0.453687	0.939168	0.681034	0.867626	0.291662	0.149031	0.63385	0.39974	0.926676	0.239824	0.0913717	0.541977	0.853072	0.835059	0.338165	0.012521	0.471591	0.136751	0.705939	0.346828	0.813433	0.906324	0.524068	0.466708	0.21057	0.137814	0.0468634	0.932294	0.176485	0.785633	9.38861e-05	0	0.0613094	0.386964	0.037017	0.179837	0.986986	0.253561
Eubacterium	0.0179371	0.91051	0.116475	0.0187505	0.071725	0.873543	0.452483	0.511372	0.133453	0.928356	0.302888	0.0151998	0.348807	0.000621154	0.0729169	0.00212782	0.000790324	0.066483	0.30654	0.324104	0.0454571	0.0223825	0.335628	0.0225816	0.0659969	0.844228	0.0306294	0.0260729	0.505284	0.0587891	0.486113	0.00285738	0.19529	0.672267	5.92767e-06	1.35566e-05	0.00540755	0.0842953	0.0262226	2.16259e-09	0.00422561	0.00324199	0.0613094	0	0.0130868	0.657187	0.380821	0.57835	0.000318222
Faecalibacterium prausnitzii	0.000903115	0.76644	0.152028	0.0556549	0.231595	0.812196	0.062166	0.306258	0.888552	0.936475	0.123373	0.119238	0.942277	0.265475	0.0231107	0.00487513	0.0906864	0.00459273	0.0565699	0.0342908	0.0331333	0.0195552	0.000806609	0.0952103	0.0595358	0.0477011	0.00809001	0.130187	0.0299801	0.00687716	0.432723	0.00108977	0.00665177	0.196786	0.0170859	0.000454956	0.00033263	0.0256692	0.00465993	0.00249998	0.386041	0.00809825	0.386964	0.0130868	0	0.78741	0.107646	0.0158723	0.000185167
Gemella sanguinis	0.110805	0.423995	0.526238	0.234928	0.692144	0.612689	0.0622887	0.847772	0.228759	0.750253	0.822973	0.646344	0.31072	0.103968	0.9212	0.0812976	0.120149	0.593584	0.114263	0.456605	0.994699	0.829877	0.0218591	0.964672	0.767694	0.575759	0.157726	0.446325	0.567192	0.453463	0.972911	0.946447	0.883629	0.743463	0.746878	0.0448947	0.0504527	0.147808	0.0122633	0.222683	0.157837	0.0585734	0.037017	0.657187	0.78741	0	0.365519	0.179165	0.427217
Geobacillus	0.335792	0.0808389	0.632685	0.760175	0.489384	0.455526	0.00116746	0.817623	0.0498781	0.186143	0.300735	0.339736	0.391321	0.837121	0.224458	0.958294	0.407498	0.51976	0.939827	0.82116	0.898316	0.931508	0.121101	0.986213	0.64017	0.45525	0.468913	0.310531	0.815149	0.0735421	0.211291	0.226322	0.441771	0.473857	0.53497	0.810627	0.00104876	0.401703	0.373058	0.0332489	0.134722	0.512824	0.179837	0.380821	0.107646	0.365519	0	0.200195	0.396172
Janibacter	0.0413531	0.342734	0.276082	0.656076	0.585659	0.617592	0.0263765	0.958725	0.791606	0.902102	0.190736	0.134093	0.299592	0.241243	0.406589	0.0983155	0.57411	0.00507834	0.49764	0.843854	0.439943	0.647335	0.330756	0.510587	0.440344	0.0438917	0.189341	0.492509	0.0852891	0.483175	0.470599	0.0714837	0.254076	0.328587	0.372537	0.385494	0.816739	0.213458	0.382267	0.0456974	0.175183	0.038649	0.986986	0.57835	0.0158723	0.179165	0.200195	0	0.0886029
Lachnospiraceae	0.00284542	0.678766	0.341706	0.111601	0.494654	0.0516008	0.160252	0.00103297	0.809948	0.712947	0.82447	0.00592902	0.180245	0.0891411	0.0594839	0.00467685	0.121049	0.0559601	0.070926	0.212987	0.00352507	0.0475742	0.108564	0.0873932	0.0412516	0.0590184	0.180172	0.138836	0.463738	0.12783	0.703447	0.00258545	0.0443787	0.00751769	9.46263e-05	2.69389e-05	0.0167988	0.344341	0.283888	0.000117663	0.0488466	0.00263785	0.253561	0.000318222	0.000185167	0.427217	0.396172	0.0886029	0
Lactobacillus zeae	0.227538	0.45259	0.558004	0.170561	0.173954	0.908593	0.449191	0.539428	0.886641	0.94318	0.258386	0.490007	0.883868	0.17705	0.0893152	0.0325556	0.542697	0.213773	0.16777	0.308214	0.534077	0.855667	0.0998014	0.06183	0.0624482	0.790618	0.143051	0.865049	0.628917	0.218161	0.00963027	0.0906778	0.28388	0.909958	0.0666268	0.271135	0.0213304	0.242467	0.918947	0.026469	0.115676	0.117876	0.843206	0.483064	0.0237734	0.206988	0.125078	0.100103	0.0517078
Oscillospira	0.000306973	0.0164326	0.0951585	0.232949	0.119301	0.810362	0.769019	0.662742	0.0196388	0.0773666	0.676045	0.261116	0.441122	0.379911	0.183247	0.0455389	0.0619497	0.114061	0.849051	0.0634457	0.0566599	0.0379312	0.0187157	0.117086	0.145827	0.639348	0.231537	0.112512	0.231739	0.875713	0.888098	4.7921e-05	0.0460174	0.593855	0.00254933	0.0175578	0.163142	0.0284539	0.00051697	0.00950181	0.0576022	0.148979	0.0649975	0.00558323	0.00460009	0.682277	0.188163	0.393263	0.000549799
Parvimonas micra	0.23214	0.486677	0.547595	0.838128	0.703434	0.124251	0.19707	0.648755	0.919545	0.320142	0.156984	0.601336	0.899968	0.102856	0.0650416	0.307572	0.827176	0.0351834	0.82499	0.708866	0.142007	0.297168	0.031059	0.217499	0.0161318	0.127545	0.426888	0.833744	0.71557	0.101757	0.809721	0.000484886	0.0131642	0.0469233	0.7528	0.0848344	0.0105498	0.043967	0.00810589	0.00644578	0.0242041	0.371859	0.746948	0.370844	0.0125417	0.460996	0.166869	0.038982	0.0326328
Propionibacterium acnes	0.168792	0.568812	0.855913	0.365193	0.769602	0.147086	0.000643497	0.333748	0.794078	0.402503	0.128845	0.460416	0.0779363	0.223131	0.164756	0.0124978	0.370544	0.0125658	0.770618	0.991178	0.661225	0.504816	0.025624	0.641577	0.972304	0.271211	0.0376226	0.589317	0.198054	0.875924	0.793224	0.000786353	0.0483231	0.162367	0.166253	0.0609545	0.00124212	0.418565	0.546096	0.012967	0.0769295	0.703229	0.808468	0.594263	0.00114899	0.656737	0.00127199	5.34264e-05	0.0187834
Propionibacterium granulosum	0.729917	0.605494	0.0320832	0.0368549	0.545856	0.340734	0.000952148	0.261229	0.457987	0.416169	0.874215	0.539162	0.621429	0.386765	0.16757	0.629164	0.732441	0.973943	0.146655	0.853794	0.804157	0.500928	0.0414882	0.0184422	0.0278384	0.505225	0.840669	0.218969	0.207959	0.121807	0.567316	0.180591	0.395039	0.511041	0.443772	0.66982	0.0180337	0.353757	0.592615	0.018099	0.0976066	0.333999	0.83975	0.973337	0.0746687	0.316936	3.74676e-05	0.00106873	0.26026
Ruminococcus	4.12656e-05	0.90157	0.0479737	0.039609	0.100464	0.452411	0.0396539	0.034478	0.163615	0.538874	0.0310308	0.042616	0.647905	0.0169818	1.69907e-05	0.00157597	0.0331014	0.0305214	0.686224	0.105193	0.007148	0.00400887	0.000583307	0.00284081	0.00413596	0.0270169	0.0198553	0.0270169	0.0131446	0.0382815	0.041113	0.00903152	0.007008	0.170587	3.96665e-05	1.59476e-06	0.000238116	0.128042	0.0106677	5.03082e-08	0.0173038	0.00234598	0.0265759	1.2415e-05	5.32529e-05	0.300316	0.529484	0.596754	0.000180921
Ruminococcus bromii	0.213737	0.444143	0.0175821	0.26154	0.0723613	0.578491	0.455743	0.353118	0.0505386	0.0193168	0.0463225	0.0327101	0.478005	0.599688	0.235244	0.0740435	0.0995426	0.955535	0.43895	0.0963691	0.308733	0.0269302	0.747532	0.265509	0.53474	0.461605	0.0252585	0.0608927	0.187472	0.398387	0.470049	0.132636	0.564106	0.813469	0.00272978	0.000471934	0.074491	0.0698843	0.000834481	0.000901765	0.0014538	0.0786145	0.188622	2.75732e-05	0.155471	0.260844	0.437193	0.30608	0.160715
Ruminococcus obeum	0.516567	0.65062	0.015676	0.0846213	0.628795	0.278617	0.735069	0.859372	0.975492	0.967937	0.0679887	0.121114	0.910611	0.00909512	0.052556	0.427492	0.289891	0.000171537	0.79626	0.342942	0.0187685	0.0879586	0.112132	0.100736	0.141827	0.305153	0.453206	0.0792134	0.745057	0.154489	0.110332	0.0212486	0.000153568	0.582023	0.275238	0.0148908	0.022212	0.447829	0.0878486	0.002416	0.0621619	0.316776	0.334291	0.00114162	0.000636557	0.271742	0.185077	0.67494	0.00660499
Schlegelella thermodepolymerans	0.638216	0.550724	0.179522	0.105595	0.301108	0.64473	0.00185396	0.417491	0.938933	0.406478	0.786203	0.68584	0.119762	0.336282	0.584332	0.554789	0.314683	0.425123	0.0632277	0.535942	0.708252	0.444244	0.119268	0.0645893	0.0849005	0.330163	0.692537	0.112744	0.255337	0.226925	0.589208	0.284036	0.495452	0.832273	0.904508	0.91445	0.0139581	0.457443	0.209995	0.060167	0.185696	0.250342	0.777897	0.790874	0.154728	0.422704	0.000768426	0.00146378	0.538741
Solobacterium moorei	0.714704	0.174042	0.865027	0.867318	0.716486	0.639427	0.479356	0.152103	0.52758	0.64742	0.132004	0.121484	0.661021	0.25728	0.699324	0.430764	0.837205	0.339158	0.476216	0.503511	0.521855	0.120109	0.748813	0.856911	0.50402	0.0857789	0.197724	0.819863	0.679781	0.0277317	0.865443	0.819526	0.0856179	0.493917	0.480822	0.189629	0.0162328	0.810891	0.797273	0.0253186	0.350469	0.0775539	0.192544	0.338626	0.246905	0.64652	0.514924	0.809834	0.371159
Staphylococcus	0.258149	0.631129	0.0176018	0.739047	0.704023	0.479035	0.0161718	0.603759	0.624872	0.110282	0.897259	0.528203	0.729307	0.416187	0.311564	0.0493898	0.00946123	0.535088	0.594944	0.988603	0.198949	0.49079	0.0660501	0.735312	0.807862	0.289074	0.2684	0.385112	0.273259	0.331117	0.994082	0.205472	0.924894	0.913342	0.713838	0.820149	0.00765372	0.894343	0.705774	0.173064	0.543239	0.981655	0.581931	0.815686	0.0250401	0.229983	0.00114084	0.000138764	0.549059
Streptococcus infantis	0.00597464	0.469439	0.285423	0.00401661	0.101239	0.604554	0.081892	0.993135	0.664215	0.643345	0.152277	0.125237	0.0710354	0.124211	0.0440032	0.00124047	0.0119437	0.0172336	0.572341	0.244872	0.0859488	0.0149031	0.00263388	0.0684289	0.00217844	0.255049	0.130065	0.191917	0.416706	0.0059238	0.134354	0.0201911	0.000734139	0.932621	0.00445103	0.0001418	0.000109065	0.337961	0.0233316	4.74951e-08	0.00606014	0.0254216	0.887921	2.67125e-05	0.0004798	0.0246507	0.0850083	0.333818	0.0262033
Other	0.000112627	0.979321	0.791692	0.302497	0.202217	0.920907	0.471833	0.362775	0.507673	0.223962	0.208804	0.0468146	0.649026	0.324731	0.265633	7.81443e-05	2.08529e-05	0.000802891	0.211088	0.0492196	0.189488	0.00701063	0.000624076	0.106808	0.0216895	0.243467	0.0575895	0.0187232	0.120158	0.319078	0.636085	9.14109e-06	0.00200665	0.172775	9.81101e-05	7.69416e-05	0.00511191	0.113044	0.000694659	2.54599e-07	0.00035461	0.00747444	0.255234	2.38745e-05	0.000606101	0.00891748	0.879987	0.0574554	0.00959837
[truncated: 13 more columns]
