# Supplementary material for: Gut microbiota signatures in cystic fibrosis: Loss of host CFTR function drives the microbiota enterophenotype
Source: PLoS One. 2018 Dec 6;13(12):e0208171. doi: 10.1371/journal.pone.0208171 (PMC6283533; doi:10.1371/journal.pone.0208171)
Supplement: S10 Table — (XLS) [file pone.0208171.s015.xls]

## Sheet: Spearman's corr-OTU-HNMR
GENUS	Spearman's Correlation
	4-Aminobutyrate	Choline	Glycine	Uracil	Phenylalanine	Acetate	Acinetobacter	Bulleidia	Clostridiaceae	Dialister	Dorea	Eggerthella	Eubacterium	Geobacillus	Janibacter	Lachnospiraceae	Oscillospira	Pediococcus	Propionibacterium	Ruminococcus	Schlegelella	Others
4-Aminobutyrate	1	0.461426	0	-0.292344	0	0	0.345224	0	0	-0.482539	-0.335869	-0.347834	0	0	0.277995	0	-0.303393	0	0	0	0	-0.481999
Choline	0.461426	1	0.356867	-0.412157	0	-0.329223	0	0	0	-0.412567	-0.438116	-0.345317	-0.390093	0	0.345147	-0.268518	-0.34864	0	0	-0.402338	0	-0.450847
Glycine	0	0.356867	1	0	0.468966	-0.416891	0	0	0	0	0	0	0	0	0	0	0	0	0	0	0.29851	0
Uracil	-0.292344	-0.412157	0	1	0	0	0	0.282187	0	0.369897	0.686505	0.459895	0.488339	0	0	0.283313	0	0	0	0.431502	0	0.502747
Phenylalanine	0	0	0.468966	0	1	-0.535944	0	0	0	-0.256513	0	0	0	0	0	0	0	0	0	0	0	-0.329456
Acetate	0	-0.329223	-0.416891	0	-0.535944	1	0	0	0	0	0	0	0	0	0	0	0	0	0	0	-0.25667	0
Acinetobacter	0.345224	0	0	0	0	0	1	0	0	0	0	0	0	0.322946	0.299923	-0.263597	0	0	0.484062	-0.302835	0.577451	0
Bulleidia	0	0	0	0.282187	0	0	0	1	0	0	0.321696	0.29386	0	0	0	0	0	0	0	0	0	0
Clostridiaceae	0	0	0	0	0	0	0	0	1	0	0	-0.279532	0	0	0	-0.344637	0	0	0	0	0	0
Dialister	-0.482539	-0.412567	0	0.369897	-0.256513	0	0	0	0	1	0.36903	0.410009	0.401177	0	0	0	0.440881	0	0	0	0	0.491413
Dorea	-0.335869	-0.438116	0	0.686505	0	0	0	0.321696	0	0.36903	1	0.614779	0.769969	-0.277646	-0.261194	0.480423	0.334989	0	-0.31097	0.467777	0	0.610628
Eggerthella	-0.347834	-0.345317	0	0.459895	0	0	0	0.29386	-0.279532	0.410009	0.614779	1	0.511473	0	-0.299175	0.403398	0	0	0	0.386535	0	0.436359
Eubacterium	0	-0.390093	0	0.488339	0	0	0	0	0	0.401177	0.769969	0.511473	1	0	0	0.497059	0.354451	0	0	0.348869	0	0.579014
Geobacillus	0	0	0	0	0	0	0.322946	0	0	0	-0.277646	0	0	1	0	0	0	0.289589	0.405425	0	0.425993	0
Janibacter	0.277995	0.345147	0	0	0	0	0.299923	0	0	0	-0.261194	-0.299175	0	0	1	0	0	0.386955	0.494965	0	0.404992	-0.257966
Lachnospiraceae	0	-0.268518	0	0.283313	0	0	-0.263597	0	-0.344637	0	0.480423	0.403398	0.497059	0	0	1	0.436393	0	-0.306554	0.51198	0	0.325239
Oscillospira	-0.303393	-0.34864	0	0	0	0	0	0	0	0.440881	0.334989	0	0.354451	0	0	0.436393	1	0	0	0.306289	0	0.370994
Pediococcus	0	0	0	0	0	0	0	0	0	0	0	0	0	0.289589	0.386955	0	0	1	0.363507	0	0.336787	0
Propionibacterium	0	0	0	0	0	0	0.484062	0	0	0	-0.31097	0	0	0.405425	0.494965	-0.306554	0	0.363507	1	0	0.437762	0
Ruminococcus	0	-0.402338	0	0.431502	0	0	-0.302835	0	0	0	0.467777	0.386535	0.348869	0	0	0.51198	0.306289	0	0	1	0	0.339509
Schlegelella	0	0	0.29851	0	0	-0.25667	0.577451	0	0	0	0	0	0	0.425993	0.404992	0	0	0.336787	0.437762	0	1	0
Others	-0.481999	-0.450847	0	0.502747	-0.329456	0	0	0	0	0.491413	0.610628	0.436359	0.579014	0	-0.257966	0.325239	0.370994	0	0	0.339509	0	1
GENUS	p-values
	4-Aminobutyrate	Choline	Glycine	Uracil	Phenylalanine	Acetate	Acinetobacter	Bulleidia	Clostridiaceae	Dialister	Dorea	Eggerthella	Eubacterium	Geobacillus	Janibacter	Lachnospiraceae	Oscillospira	Pediococcus	Propionibacterium	Ruminococcus	Schlegelella	Others
4-Aminobutyrate	0	0.000234777	0.234894	0.0246515	0.188731	0.0606859	0.0074096	0.207272	0.335191	0.000108676	0.00930383	0.00694524	0.186386	0.628794	0.0330191	0.367467	0.0194965	0.649471	0.618572	0.0631279	0.103808	0.000110908
Choline	0.000234777	0	0.00552875	0.00118036	0.0553227	0.010893	0.286662	0.254493	0.616618	0.00116574	0.000519606	0.00739266	0.00225627	0.70805	0.00742378	0.0397506	0.00680718	0.939205	0.110091	0.00158339	0.112744	0.000339068
Glycine	0.234894	0.00552875	0	0.22277	0.000179342	0.00102122	0.373095	0.431184	0.771705	0.126565	0.148307	0.0548814	0.13948	0.632035	0.269215	0.167835	0.197619	0.781178	0.305984	0.529131	0.0216491	0.12388
Uracil	0.0246515	0.00118036	0.22277	0	0.76572	0.66783	0.0839407	0.03036	0.359363	0.00393312	1.94647e-09	0.000247786	8.71671e-05	0.387274	0.2339	0.0296774	0.0707877	0.28123	0.102278	0.00064441	0.409938	4.95278e-05
Phenylalanine	0.188731	0.0553227	0.000179342	0.76572	0	1.21683e-05	0.115124	0.480297	0.776758	0.0498667	0.19649	0.18494	0.054624	0.925726	0.281841	0.796337	0.169	0.687713	0.681672	0.284673	0.644005	0.0108333
Acetate	0.0606859	0.010893	0.00102122	0.66783	1.21683e-05	0	0.882466	0.998753	0.178956	0.0873582	0.372956	0.141374	0.225013	0.285274	0.0533228	0.449147	0.380466	0.801082	0.322559	0.604978	0.0497219	0.174041
Acinetobacter	0.0074096	0.286662	0.373095	0.0839407	0.115124	0.882466	0	0.948772	0.271377	0.517757	0.0609276	0.111287	0.891756	0.0126041	0.0210063	0.0436706	0.252144	0.422311	0.000102602	0.019733	1.68323e-06	0.574472
Bulleidia	0.207272	0.254493	0.431184	0.03036	0.480297	0.998753	0.948772	0	0.596434	0.329989	0.0129713	0.0238823	0.13729	0.460991	0.732901	0.419504	0.120937	0.717055	0.644589	0.0974827	0.610228	0.175451
Clostridiaceae	0.335191	0.616618	0.771705	0.359363	0.776758	0.178956	0.271377	0.596434	0	0.0633459	0.199042	0.0320227	0.539958	0.473857	0.328587	0.00751769	0.593855	0.838764	0.153318	0.416888	0.832273	0.1752
Dialister	0.000108676	0.00116574	0.126565	0.00393312	0.0498667	0.0873582	0.517757	0.329989	0.0633459	0	0.00402503	0.00125965	0.0016384	0.638142	0.856354	0.265064	0.00047427	0.787712	0.88997	0.215944	0.545766	7.7427e-05
Dorea	0.00930383	0.000519606	0.148307	1.94647e-09	0.19649	0.372956	0.0609276	0.0129713	0.199042	0.00402503	0	2.21787e-07	1.02005e-12	0.0332489	0.0456974	0.000117663	0.00950181	0.0628388	0.016518	0.000187199	0.060167	2.81488e-07
Eggerthella	0.00694524	0.00739266	0.0548814	0.000247786	0.18494	0.141374	0.111287	0.0238823	0.0320227	0.00125965	2.21787e-07	0	3.47306e-05	0.326907	0.0213444	0.00153461	0.108248	0.111302	0.582138	0.00249467	0.17708	0.000550415
Eubacterium	0.186386	0.00225627	0.13948	8.71671e-05	0.054624	0.225013	0.891756	0.13729	0.539958	0.0016384	1.02005e-12	3.47306e-05	0	0.370471	0.315191	6.20995e-05	0.00588023	0.336055	0.494579	0.00676833	0.760378	1.55407e-06
Geobacillus	0.628794	0.70805	0.632035	0.387274	0.925726	0.285274	0.0126041	0.460991	0.473857	0.638142	0.0332489	0.326907	0.370471	0	0.200195	0.396172	0.188163	0.0261024	0.00144509	0.377513	0.000768426	0.837832
Janibacter	0.0330191	0.00742378	0.269215	0.2339	0.281841	0.0533228	0.0210063	0.732901	0.328587	0.856354	0.0456974	0.0213444	0.315191	0.200195	0	0.0886029	0.393263	0.00246537	6.74231e-05	0.540555	0.00146378	0.0485408
Lachnospiraceae	0.367467	0.0397506	0.167835	0.0296774	0.796337	0.449147	0.0436706	0.419504	0.00751769	0.265064	0.000117663	0.00153461	6.20995e-05	0.396172	0.0886029	0	0.000549799	0.305221	0.0182026	3.40116e-05	0.538741	0.0119538
Oscillospira	0.0194965	0.00680718	0.197619	0.0707877	0.169	0.380466	0.252144	0.120937	0.593855	0.00047427	0.00950181	0.108248	0.00588023	0.188163	0.393263	0.000549799	0	0.959393	0.124464	0.0183084	0.61879	0.00381958
Pediococcus	0.649471	0.939205	0.781178	0.28123	0.687713	0.801082	0.422311	0.717055	0.838764	0.787712	0.0628388	0.111302	0.336055	0.0261024	0.00246537	0.305221	0.959393	0	0.00465595	0.815334	0.00910096	0.159559
Propionibacterium	0.618572	0.110091	0.305984	0.102278	0.681672	0.322559	0.000102602	0.644589	0.153318	0.88997	0.016518	0.582138	0.494579	0.00144509	6.74231e-05	0.0182026	0.124464	0.00465595	0	0.0502765	0.000525684	0.11101
Ruminococcus	0.0631279	0.00158339	0.529131	0.00064441	0.284673	0.604978	0.019733	0.0974827	0.416888	0.215944	0.000187199	0.00249467	0.00676833	0.377513	0.540555	3.40116e-05	0.0183084	0.815334	0.0502765	0	0.964623	0.0085219
Schlegelella	0.103808	0.112744	0.0216491	0.409938	0.644005	0.0497219	1.68323e-06	0.610228	0.832273	0.545766	0.060167	0.17708	0.760378	0.000768426	0.00146378	0.538741	0.61879	0.00910096	0.000525684	0.964623	0	0.60677
Others	0.000110908	0.000339068	0.12388	4.95278e-05	0.0108333	0.174041	0.574472	0.175451	0.1752	7.7427e-05	2.81488e-07	0.000550415	1.55407e-06	0.837832	0.0485408	0.0119538	0.00381958	0.159559	0.11101	0.0085219	0.60677	0
SPECIES
	Spearman's Correlation
	4-Aminobutyrate	Choline	Glycine	Uracil	Phenylalanine	Acetate	Alistipes putredinis	Bifidobacterium	Clostridiaceae	Clostridium	Clostridium sp.	Clostridium difficile	Coprobacillus	Dialister invisus	Dorea formicigenerans	Eggerthella	Eggerthella lenta	Erysipelotrichaceae	Eubacterium	Faecalibacterium prausnitzii	Gemella sanguinis	Geobacillus	Janibacter	Lachnospiraceae	Lactobacillus zeae	Oscillospira	Parvimonas micra	Propionibacterium acnes	Propionibacterium granulosum	Ruminococcus	Ruminococcus bromii	Ruminococcus obeum	Schlegelella thermodepolymerans	Solobacterium moorei	Staphylococcus	Streptococcus infantis	Other
4-Aminobutyrate	1	0.461426	0	-0.292344	0	0	-0.411893	0	0	0	-0.31859	0	0	-0.439719	-0.335869	-0.310802	-0.313674	0	0	0	-0.355113	0	0.277995	0	0.290522	-0.303393	-0.278444	0	0	-0.307249	-0.316833	0	0	0	0	0	-0.484687
Choline	0.461426	1	0.356867	-0.412157	0	-0.329223	-0.257111	0	0	-0.363259	-0.373764	0.303274	0	-0.41589	-0.438116	-0.33948	-0.26572	0	-0.308722	0	0	0	0.345147	-0.268518	0	-0.34864	0	0	0	-0.505736	-0.258707	0	0	0	0	-0.355642	-0.441496
Glycine	0	0.356867	1	0	0.468966	-0.416891	0	0	0	0	0	0	0	0	0	-0.323277	0	0	0	0	0	0	0	0	0	0	0	0	0.423278	0	0	0	0.29851	0	0	0	0
Uracil	-0.292344	-0.412157	0	1	0	0	0.366852	0.295481	0	0.35607	0.616496	-0.533131	0.352151	0.358753	0.686505	0.400279	0.383363	0	0.425344	0.371584	0.348435	0	0	0.283313	-0.300611	0	0.306736	0	0	0.556562	0.352644	0	0	0	0	0.527538	0.508416
Phenylalanine	0	0	0.468966	0	1	-0.535944	0	0	0	-0.268338	0	0	0	-0.310274	0	-0.303561	0	0	0	0	0	0	0	0	0	0	0	0	0	0	0	0	0	0	0	0	-0.3263
Acetate	0	-0.329223	-0.416891	0	-0.535944	1	0	0	0	0	0	0	0	0	0	0	0	0	0	0	0	0	0	0	0	0	0	0	-0.342054	0	0	0	-0.25667	0	0	0	0
Alistipes putredinis	-0.411893	-0.257111	0	0.366852	0	0	1	0.527089	-0.353258	0.343586	0.448205	-0.341151	0	0.441081	0.487565	0.380391	0	0	0.381663	0.414775	0	0	0	0.385259	0	0.503568	0.440212	-0.425265	0	0.337105	0	0.299386	0	0	0	0.301769	0.542301
Bifidobacterium	0	0	0	0.295481	0	0	0.527089	1	0	0	0.326526	0	0	0	0.39522	0.268711	0	0	0	0.349564	0	0	0	0.262747	0	0.260823	0.321051	-0.258207	0	0.347473	0	0.473231	0	0	0	0.427431	0.394198
Clostridiaceae	0	0	0	0	0	0	-0.353258	0	1	0	0	0	0	0	0	0	0	0	0	0	0	0	0	-0.344637	0	0	-0.259783	0	0	0	0	0	0	0	0	0	0
Clostridium	0	-0.363259	0	0.35607	-0.268338	0	0.343586	0	0	1	0.54972	0	0	0	0.542119	0.34201	0.331357	0	0.551688	0.30944	0	0	0	0.486192	0	0.385762	0	0	0	0.508234	0.38331	0	0	0	0	0.365225	0.485242
Clostridium sp.	-0.31859	-0.373764	0	0.616496	0	0	0.448205	0.326526	0	0.54972	1	-0.526403	0	0.374465	0.67225	0.392405	0.447735	0	0.533509	0.442132	0.262135	0	0	0.517576	0	0.308201	0	0	0	0.578509	0.441029	0.315617	0	0	0	0.475401	0.491575
Clostridium difficile	0	0.303274	0	-0.533131	0	0	-0.341151	0	0	0	-0.526403	1	0	-0.461023	-0.592293	-0.370449	-0.345333	0	-0.357732	-0.451408	0	0.416026	0	-0.310208	0.299206	0	-0.330583	0.410473	0.306981	-0.461026	0	-0.297301	0.318481	-0.311755	0.343909	-0.482444	-0.359914
Coprobacillus	0	0	0	0.352151	0	0	0	0	0	0	0	0	1	0.351233	0.380855	0	0.373918	0.259851	0	0.290397	0	0	0	0	0	0.285385	0.26324	0	0	0	0	0	0	0	0	0	0
Dialister invisus	-0.439719	-0.41589	0	0.358753	-0.310274	0	0.441081	0	0	0	0.374465	-0.461023	0.351233	1	0.398961	0.433963	0.328892	0	0.289366	0.363475	0.324135	0	0	0	0	0.43827	0.341566	0	0	0.330111	0.42338	0	0	0	0	0.294971	0.429163
Dorea formicigenerans	-0.335869	-0.438116	0	0.686505	0	0	0.487565	0.39522	0	0.542119	0.67225	-0.592293	0.380855	0.398961	1	0.587062	0.503639	0	0.685105	0.386459	0	-0.277646	-0.261194	0.480423	-0.288913	0.334989	0.350818	-0.32171	-0.306815	0.63934	0.420903	0.387674	0	0.29106	0	0.640251	0.612384
Eggerthella	-0.310802	-0.33948	-0.323277	0.400279	-0.303561	0	0.380391	0.268711	0	0.34201	0.392405	-0.370449	0	0.433963	0.587062	1	0.325317	0	0.367196	0	0	0	0	0.257628	0	0	0.293221	0	0	0.308864	0.405222	0	0	0	0	0.353264	0.449534
Eggerthella lenta	-0.313674	-0.26572	0	0.383363	0	0	0	0	0	0.331357	0.447735	-0.345333	0.373918	0.328892	0.503639	0.325317	1	0.486398	0.377064	0.341605	0	0	-0.269973	0.384541	0	0	0	0	0	0.388716	0	0	0	0	0	0.290865	0.344871
Erysipelotrichaceae	0	0	0	0	0	0	0	0	0	0	0	0	0.259851	0	0	0	0.486398	1	0	0	0.272193	0	0	0	0	0	0	0	0	0.288717	0	0	0	0	0	0	0
Eubacterium	0	-0.308722	0	0.425344	0	0	0.381663	0	0	0.551688	0.533509	-0.357732	0	0.289366	0.685105	0.367196	0.377064	0	1	0.321309	0	0	0	0.452698	0	0.356484	0	0	0	0.535493	0.517022	0.413254	0	0	0	0.517777	0.520437
Faecalibacterium prausnitzii	0	0	0	0.371584	0	0	0.414775	0.349564	0	0.30944	0.442132	-0.451408	0.290397	0.363475	0.386459	0	0.341605	0	0.321309	1	0	0	-0.312765	0.46808	-0.294078	0.363969	0.323162	-0.413042	0	0.500934	0	0.431882	0	0	-0.291593	0.440531	0.433399
Gemella sanguinis	-0.355113	0	0	0.348435	0	0	0	0	0	0	0.262135	0	0	0.324135	0	0	0	0.272193	0	0	1	0	0	0	0	0	0	0	0	0	0	0	0	0	0	0.292345	0.337633
Geobacillus	0	0	0	0	0	0	0	0	0	0	0	0.416026	0	0	-0.277646	0	0	0	0	0	0	1	0	0	0	0	0	0.409685	0.509628	0	0	0	0.425993	0	0.413276	0	0
Janibacter	0.277995	0.345147	0	0	0	0	0	0	0	0	0	0	0	0	-0.261194	0	-0.269973	0	0	-0.312765	0	0	1	0	0	0	-0.26953	0.500853	0.415412	0	0	0	0.404992	0	0.475987	0	0
Lachnospiraceae	0	-0.268518	0	0.283313	0	0	0.385259	0.262747	-0.344637	0.486192	0.517576	-0.310208	0	0	0.480423	0.257628	0.384541	0	0.452698	0.46808	0	0	0	1	0	0.436393	0.278586	-0.305113	0	0.468723	0	0.349846	0	0	0	0.289402	0.334566
Lactobacillus zeae	0.290522	0	0	-0.300611	0	0	0	0	0	0	0	0.299206	0	0	-0.288913	0	0	0	0	-0.294078	0	0	0	0	1	0	0	0.263273	0.338271	0	0	0	0.266424	0	0	-0.314297	-0.346151
Oscillospira	-0.303393	-0.34864	0	0	0	0	0.503568	0.260823	0	0.385762	0.308201	0	0.285385	0.43827	0.334989	0	0	0	0.356484	0.363969	0	0	0	0.436393	0	1	0	0	0	0.428761	0.333832	0	0	0	0	0	0.366617
Parvimonas micra	-0.278444	0	0	0.306736	0	0	0.440212	0.321051	-0.259783	0	0	-0.330583	0.26324	0.341566	0.350818	0.293221	0	0	0	0.323162	0	0	-0.26953	0.278586	0	0	1	-0.314395	0	0	0	0.341943	0	0	0	0	0
Propionibacterium acnes	0	0	0	0	0	0	-0.425265	-0.258207	0	0	0	0.410473	0	0	-0.32171	0	0	0	0	-0.413042	0	0.409685	0.500853	-0.305113	0.263273	0	-0.314395	1	0.508451	-0.261605	0	0	0.438081	0	0.530522	0	0
Propionibacterium granulosum	0	0	0.423278	0	0	-0.342054	0	0	0	0	0	0.306981	0	0	-0.306815	0	0	0	0	0	0	0.509628	0.415412	0	0.338271	0	0	0.508451	1	0	0	0	0.793783	0	0.484981	0	0
Ruminococcus	-0.307249	-0.505736	0	0.556562	0	0	0.337105	0.347473	0	0.508234	0.578509	-0.461026	0	0.330111	0.63934	0.308864	0.388716	0.288717	0.535493	0.500934	0	0	0	0.468723	0	0.428761	0	-0.261605	0	1	0.349217	0.375177	0	0	0	0.506539	0.526713
Ruminococcus bromii	-0.316833	-0.258707	0	0.352644	0	0	0	0	0	0.38331	0.441029	0	0	0.42338	0.420903	0.405222	0	0	0.517022	0	0	0	0	0	0	0.333832	0	0	0	0.349217	1	0	0	0	0	0	0.344376
Ruminococcus obeum	0	0	0	0	0	0	0.299386	0.473231	0	0	0.315617	-0.297301	0	0	0.387674	0	0	0	0.413254	0.431882	0	0	0	0.349846	0	0	0.341943	0	0	0.375177	0	1	0	0	0	0.567949	0
Schlegelella thermodepolymerans	0	0	0.29851	0	0	-0.25667	0	0	0	0	0	0.318481	0	0	0	0	0	0	0	0	0	0.425993	0.404992	0	0.266424	0	0	0.438081	0.793783	0	0	0	1	0	0.51269	0	0
Solobacterium moorei	0	0	0	0	0	0	0	0	0	0	0	-0.311755	0	0	0.29106	0	0	0	0	0	0	0	0	0	0	0	0	0	0	0	0	0	0	1	0	0.325882	0
Staphylococcus	0	0	0	0	0	0	0	0	0	0	0	0.343909	0	0	0	0	0	0	0	-0.291593	0	0.413276	0.475987	0	0	0	0	0.530522	0.484981	0	0	0	0.51269	0	1	0	0
Streptococcus infantis	0	-0.355642	0	0.527538	0	0	0.301769	0.427431	0	0.365225	0.475401	-0.482444	0	0.294971	0.640251	0.353264	0.290865	0	0.517777	0.440531	0.292345	0	0	0.289402	-0.314297	0	0	0	0	0.506539	0	0.567949	0	0.325882	0	1	0.585712
Other	-0.484687	-0.441496	0	0.508416	-0.3263	0	0.542301	0.394198	0	0.485242	0.491575	-0.359914	0	0.429163	0.612384	0.449534	0.344871	0	0.520437	0.433399	0.337633	0	0	0.334566	-0.346151	0.366617	0	0	0	0.526713	0.344376	0	0	0	0	0.585712	1
SPECIES	p-values
	4-Aminobutyrate	Choline	Glycine	Uracil	Phenylalanine	Acetate	Alistipes putredinis	Bifidobacterium	Clostridiaceae	Clostridium	Clostridium sp.	Clostridium difficile	Coprobacillus	Dialister invisus	Dorea formicigenerans	Eggerthella	Eggerthella lenta	Erysipelotrichaceae	Eubacterium	Faecalibacterium prausnitzii	Gemella sanguinis	Geobacillus	Janibacter	Lachnospiraceae	Lactobacillus zeae	Oscillospira	Parvimonas micra	Propionibacterium acnes	Propionibacterium granulosum	Ruminococcus	Ruminococcus bromii	Ruminococcus obeum	Schlegelella thermodepolymerans	Solobacterium moorei	Staphylococcus	Streptococcus infantis	Other
4-Aminobutyrate	0	0.000234777	0.234894	0.0246515	0.188731	0.0606859	0.00118985	0.190876	0.335191	0.143542	0.0139237	0.0559567	0.0705783	0.000492866	0.00930383	0.0165795	0.0155538	0.115562	0.391984	0.070115	0.00578202	0.628794	0.0330191	0.367467	0.025603	0.0194965	0.0327255	0.49001	0.0593998	0.0179281	0.0144885	0.69153	0.103808	0.368905	0.0642496	0.0777212	0.000100197
Choline	0.000234777	0	0.00552875	0.00118036	0.0553227	0.010893	0.0493176	0.17619	0.616618	0.00468627	0.00354554	0.0195469	0.637662	0.00105315	0.000519606	0.00852782	0.0419422	0.290621	0.0173583	0.0681172	0.0573535	0.70805	0.00742378	0.0397506	0.0705463	0.00680718	0.0947754	0.0828369	0.0685729	4.39057e-05	0.0478752	0.302961	0.112744	0.351897	0.0853233	0.00570462	0.000464678
Glycine	0.234894	0.00552875	0	0.22277	0.000179342	0.00102122	0.421112	0.845258	0.771705	0.226161	0.262094	0.5917	0.617349	0.110021	0.148307	0.0125084	0.136033	0.433502	0.238495	0.617737	0.569202	0.632035	0.269215	0.167835	0.143051	0.197619	0.602905	0.400623	0.00083715	0.0518238	0.292713	0.969997	0.0216491	0.414241	0.146307	0.205653	0.141719
Uracil	0.0246515	0.00118036	0.22277	0	0.76572	0.66783	0.00426417	0.0230824	0.359363	0.00564267	2.00763e-07	1.37846e-05	0.00623297	0.0052674	1.94647e-09	0.00168213	0.00272583	0.143265	0.000784371	0.00375971	0.00684197	0.387274	0.2339	0.0296774	0.0206995	0.0707877	0.0181304	0.0907055	0.104125	4.70905e-06	0.0061558	0.14752	0.409938	0.0823688	0.395365	1.76066e-05	3.93722e-05
Phenylalanine	0.188731	0.0553227	0.000179342	0.76572	0	1.21683e-05	0.47343	0.339018	0.776758	0.0398888	0.580978	0.83055	0.516918	0.0167741	0.19649	0.0194261	0.410818	0.235283	0.0924848	0.664464	0.524785	0.925726	0.281841	0.796337	0.210882	0.169	0.821494	0.515674	0.574746	0.188908	0.069969	0.535782	0.644005	0.557018	0.839096	0.242579	0.0116629
Acetate	0.0606859	0.010893	0.00102122	0.66783	1.21683e-05	0	0.677557	0.171571	0.178956	0.741982	0.751042	0.618884	0.580264	0.0528175	0.372956	0.285459	0.226946	0.882223	0.234685	0.518907	0.0800967	0.285274	0.0533228	0.449147	0.439707	0.380466	0.44724	0.509659	0.00800974	0.116645	0.476864	0.239009	0.0497219	0.889663	0.072467	0.61487	0.199058
Alistipes putredinis	0.00118985	0.0493176	0.421112	0.00426417	0.47343	0.677557	0	1.79524e-05	0.00606101	0.00771457	0.000370993	0.00818844	0.249326	0.000471127	8.9792e-05	0.00295948	0.112879	0.813433	0.00285738	0.00108977	0.946447	0.226322	0.0714837	0.00258545	0.0906778	4.7921e-05	0.000484886	0.000786353	0.180591	0.00903152	0.132636	0.0212486	0.284036	0.819526	0.205472	0.0201911	9.14109e-06
Bifidobacterium	0.190876	0.17619	0.845258	0.0230824	0.339018	0.171571	1.79524e-05	0	0.583265	0.0573976	0.0116019	0.0976066	0.353757	0.303396	0.00194849	0.0396035	0.252551	0.906324	0.19529	0.00665177	0.883629	0.441771	0.254076	0.0443787	0.28388	0.0460174	0.0131642	0.0483231	0.395039	0.007008	0.564106	0.000153568	0.495452	0.0856179	0.924894	0.000734139	0.00200665
Clostridiaceae	0.335191	0.616618	0.771705	0.359363	0.776758	0.178956	0.00606101	0.583265	0	0.742575	0.25664	0.224402	0.545679	0.122217	0.199042	0.0776024	0.0500055	0.524068	0.672267	0.196786	0.743463	0.473857	0.328587	0.00751769	0.909958	0.593855	0.0469233	0.162367	0.511041	0.170587	0.813469	0.582023	0.832273	0.493917	0.913342	0.932621	0.172775
Clostridium	0.143542	0.00468627	0.226161	0.00564267	0.0398888	0.741982	0.00771457	0.0573976	0.742575	0	6.49835e-06	0.104062	0.126965	0.13095	9.21735e-06	0.00801847	0.0103589	0.466708	5.92767e-06	0.0170859	0.746878	0.53497	0.372537	9.46263e-05	0.0666268	0.00254933	0.7528	0.166253	0.443772	3.96665e-05	0.00272978	0.275238	0.904508	0.480822	0.713838	0.00445103	9.81101e-05
Clostridium sp.	0.0139237	0.00354554	0.262094	2.00763e-07	0.580978	0.751042	0.000370993	0.0116019	0.25664	6.49835e-06	0	1.84935e-05	0.147794	0.00347902	5.53481e-09	0.00211245	0.000376944	0.21057	1.35566e-05	0.000454956	0.0448947	0.810627	0.385494	2.69389e-05	0.271135	0.0175578	0.0848344	0.0609545	0.66982	1.59476e-06	0.000471934	0.0148908	0.91445	0.189629	0.820149	0.0001418	7.69416e-05
Clostridium difficile	0.0559567	0.0195469	0.5917	1.37846e-05	0.83055	0.618884	0.00818844	0.0976066	0.224402	0.104062	1.84935e-05	0	0.0704062	0.000238142	7.75225e-07	0.00387565	0.00738974	0.137814	0.00540755	0.00033263	0.0504527	0.00104876	0.816739	0.0167988	0.0213304	0.163142	0.0105498	0.00124212	0.0180337	0.000238116	0.074491	0.022212	0.0139581	0.0162328	0.00765372	0.000109065	0.00511191
Coprobacillus	0.0705783	0.637662	0.617349	0.00623297	0.516918	0.580264	0.249326	0.353757	0.545679	0.126965	0.147794	0.0704062	0	0.00637885	0.00292184	0.0798195	0.0035308	0.0468634	0.0842953	0.0256692	0.147808	0.401703	0.213458	0.344341	0.242467	0.0284539	0.043967	0.418565	0.353757	0.128042	0.0698843	0.447829	0.457443	0.810891	0.894343	0.337961	0.113044
Dialister invisus	0.000492866	0.00105315	0.110021	0.0052674	0.0167741	0.0528175	0.000471127	0.303396	0.122217	0.13095	0.00347902	0.000238142	0.00637885	0	0.00174815	0.000595103	0.0109778	0.932294	0.0262226	0.00465993	0.0122633	0.373058	0.382267	0.283888	0.918947	0.00051697	0.00810589	0.546096	0.592615	0.0106677	0.000834481	0.0878486	0.209995	0.797273	0.705774	0.0233316	0.000694659
Dorea formicigenerans	0.00930383	0.000519606	0.148307	1.94647e-09	0.19649	0.372956	8.9792e-05	0.00194849	0.199042	9.21735e-06	5.53481e-09	7.75225e-07	0.00292184	0.00174815	0	1.02333e-06	4.77837e-05	0.176485	2.16259e-09	0.00249998	0.222683	0.0332489	0.0456974	0.000117663	0.026469	0.00950181	0.00644578	0.012967	0.018099	5.03082e-08	0.000901765	0.002416	0.060167	0.0253186	0.173064	4.74951e-08	2.54599e-07
Eggerthella	0.0165795	0.00852782	0.0125084	0.00168213	0.0194261	0.285459	0.00295948	0.0396035	0.0776024	0.00801847	0.00211245	0.00387565	0.0798195	0.000595103	1.02333e-06	0	0.0119323	0.785633	0.00422561	0.386041	0.157837	0.134722	0.175183	0.0488466	0.115676	0.0576022	0.0242041	0.0769295	0.0976066	0.0173038	0.0014538	0.0621619	0.185696	0.350469	0.543239	0.00606014	0.00035461
Eggerthella lenta	0.0155538	0.0419422	0.136033	0.00272583	0.410818	0.226946	0.112879	0.252551	0.0500055	0.0103589	0.000376944	0.00738974	0.0035308	0.0109778	4.77837e-05	0.0119323	0	9.38861e-05	0.00324199	0.00809825	0.0585734	0.512824	0.038649	0.00263785	0.117876	0.148979	0.371859	0.703229	0.333999	0.00234598	0.0786145	0.316776	0.250342	0.0775539	0.981655	0.0254216	0.00747444
Erysipelotrichaceae	0.115562	0.290621	0.433502	0.143265	0.235283	0.882223	0.813433	0.906324	0.524068	0.466708	0.21057	0.137814	0.0468634	0.932294	0.176485	0.785633	9.38861e-05	0	0.0613094	0.386964	0.037017	0.179837	0.986986	0.253561	0.843206	0.0649975	0.746948	0.808468	0.83975	0.0265759	0.188622	0.334291	0.777897	0.192544	0.581931	0.887921	0.255234
Eubacterium	0.391984	0.0173583	0.238495	0.000784371	0.0924848	0.234685	0.00285738	0.19529	0.672267	5.92767e-06	1.35566e-05	0.00540755	0.0842953	0.0262226	2.16259e-09	0.00422561	0.00324199	0.0613094	0	0.0130868	0.657187	0.380821	0.57835	0.000318222	0.483064	0.00558323	0.370844	0.594263	0.973337	1.2415e-05	2.75732e-05	0.00114162	0.790874	0.338626	0.815686	2.67125e-05	2.38745e-05
Faecalibacterium prausnitzii	0.070115	0.0681172	0.617737	0.00375971	0.664464	0.518907	0.00108977	0.00665177	0.196786	0.0170859	0.000454956	0.00033263	0.0256692	0.00465993	0.00249998	0.386041	0.00809825	0.386964	0.0130868	0	0.78741	0.107646	0.0158723	0.000185167	0.0237734	0.00460009	0.0125417	0.00114899	0.0746687	5.32529e-05	0.155471	0.000636557	0.154728	0.246905	0.0250401	0.0004798	0.000606101
Gemella sanguinis	0.00578202	0.0573535	0.569202	0.00684197	0.524785	0.0800967	0.946447	0.883629	0.743463	0.746878	0.0448947	0.0504527	0.147808	0.0122633	0.222683	0.157837	0.0585734	0.037017	0.657187	0.78741	0	0.365519	0.179165	0.427217	0.206988	0.682277	0.460996	0.656737	0.316936	0.300316	0.260844	0.271742	0.422704	0.64652	0.229983	0.0246507	0.00891748
Geobacillus	0.628794	0.70805	0.632035	0.387274	0.925726	0.285274	0.226322	0.441771	0.473857	0.53497	0.810627	0.00104876	0.401703	0.373058	0.0332489	0.134722	0.512824	0.179837	0.380821	0.107646	0.365519	0	0.200195	0.396172	0.125078	0.188163	0.166869	0.00127199	3.74676e-05	0.529484	0.437193	0.185077	0.000768426	0.514924	0.00114084	0.0850083	0.879987
Janibacter	0.0330191	0.00742378	0.269215	0.2339	0.281841	0.0533228	0.0714837	0.254076	0.328587	0.372537	0.385494	0.816739	0.213458	0.382267	0.0456974	0.175183	0.038649	0.986986	0.57835	0.0158723	0.179165	0.200195	0	0.0886029	0.100103	0.393263	0.038982	5.34264e-05	0.00106873	0.596754	0.30608	0.67494	0.00146378	0.809834	0.000138764	0.333818	0.0574554
Lachnospiraceae	0.367467	0.0397506	0.167835	0.0296774	0.796337	0.449147	0.00258545	0.0443787	0.00751769	9.46263e-05	2.69389e-05	0.0167988	0.344341	0.283888	0.000117663	0.0488466	0.00263785	0.253561	0.000318222	0.000185167	0.427217	0.396172	0.0886029	0	0.0517078	0.000549799	0.0326328	0.0187834	0.26026	0.000180921	0.160715	0.00660499	0.538741	0.371159	0.549059	0.0262033	0.00959837
Lactobacillus zeae	0.025603	0.0705463	0.143051	0.0206995	0.210882	0.439707	0.0906778	0.28388	0.909958	0.0666268	0.271135	0.0213304	0.242467	0.918947	0.026469	0.115676	0.117876	0.843206	0.483064	0.0237734	0.206988	0.125078	0.100103	0.0517078	0	0.423309	0.210344	0.04394	0.00878117	0.0544764	0.389567	0.189888	0.041382	0.805756	0.249834	0.0153383	0.0072417
Oscillospira	0.0194965	0.00680718	0.197619	0.0707877	0.169	0.380466	4.7921e-05	0.0460174	0.593855	0.00254933	0.0175578	0.163142	0.0284539	0.00051697	0.00950181	0.0576022	0.148979	0.0649975	0.00558323	0.00460009	0.682277	0.188163	0.393263	0.000549799	0.423309	0	0.051944	0.0950824	0.658988	0.000703656	0.00976794	0.0959544	0.61879	0.0527107	0.661802	0.154535	0.00429072
Parvimonas micra	0.0327255	0.0947754	0.602905	0.0181304	0.821494	0.44724	0.000484886	0.0131642	0.0469233	0.7528	0.0848344	0.0105498	0.043967	0.00810589	0.00644578	0.0242041	0.371859	0.746948	0.370844	0.0125417	0.460996	0.166869	0.038982	0.0326328	0.210344	0.051944	0	0.0153049	0.125902	0.0685256	0.3129	0.00803149	0.221155	0.466816	0.562754	0.0947593	0.0766374
Propionibacterium acnes	0.49001	0.0828369	0.400623	0.0907055	0.515674	0.509659	0.000786353	0.0483231	0.162367	0.166253	0.0609545	0.00124212	0.418565	0.546096	0.012967	0.0769295	0.703229	0.808468	0.594263	0.00114899	0.656737	0.00127199	5.34264e-05	0.0187834	0.04394	0.0950824	0.0153049	0	3.93161e-05	0.0453452	0.520818	0.121212	0.000520194	0.772784	1.54603e-05	0.332143	0.0705691
Propionibacterium granulosum	0.0593998	0.0685729	0.00083715	0.104125	0.574746	0.00800974	0.180591	0.395039	0.511041	0.443772	0.66982	0.0180337	0.353757	0.592615	0.018099	0.0976066	0.333999	0.83975	0.973337	0.0746687	0.316936	3.74676e-05	0.00106873	0.26026	0.00878117	0.658988	0.125902	3.93161e-05	0	0.075174	0.755668	0.627356	6.4398e-14	0.327492	9.90866e-05	0.0562682	0.296311
Ruminococcus	0.0179281	4.39057e-05	0.0518238	4.70905e-06	0.188908	0.116645	0.00903152	0.007008	0.170587	3.96665e-05	1.59476e-06	0.000238116	0.128042	0.0106677	5.03082e-08	0.0173038	0.00234598	0.0265759	1.2415e-05	5.32529e-05	0.300316	0.529484	0.596754	0.000180921	0.0544764	0.000703656	0.0685256	0.0453452	0.075174	0	0.00670971	0.0034126	0.32553	0.191751	0.932647	4.24997e-05	1.82472e-05
Ruminococcus bromii	0.0144885	0.0478752	0.292713	0.0061558	0.069969	0.476864	0.132636	0.564106	0.813469	0.00272978	0.000471934	0.074491	0.0698843	0.000834481	0.000901765	0.0014538	0.0786145	0.188622	2.75732e-05	0.155471	0.260844	0.437193	0.30608	0.160715	0.389567	0.00976794	0.3129	0.520818	0.755668	0.00670971	0	0.189759	0.736282	0.127388	0.0614136	0.0832092	0.00756627
Ruminococcus obeum	0.69153	0.302961	0.969997	0.14752	0.535782	0.239009	0.0212486	0.000153568	0.582023	0.275238	0.0148908	0.022212	0.447829	0.0878486	0.002416	0.0621619	0.316776	0.334291	0.00114162	0.000636557	0.271742	0.185077	0.67494	0.00660499	0.189888	0.0959544	0.00803149	0.121212	0.627356	0.0034126	0.189759	0	0.240737	0.0729611	0.603052	2.71127e-06	0.0707963
Schlegelella thermodepolymerans	0.103808	0.112744	0.0216491	0.409938	0.644005	0.0497219	0.284036	0.495452	0.832273	0.904508	0.91445	0.0139581	0.457443	0.209995	0.060167	0.185696	0.250342	0.777897	0.790874	0.154728	0.422704	0.000768426	0.00146378	0.538741	0.041382	0.61879	0.221155	0.000520194	6.4398e-14	0.32553	0.736282	0.240737	0	0.66823	3.30278e-05	0.1278	0.649814
Solobacterium moorei	0.368905	0.351897	0.414241	0.0823688	0.557018	0.889663	0.819526	0.0856179	0.493917	0.480822	0.189629	0.0162328	0.810891	0.797273	0.0253186	0.350469	0.0775539	0.192544	0.338626	0.246905	0.64652	0.514924	0.809834	0.371159	0.805756	0.0527107	0.466816	0.772784	0.327492	0.191751	0.127388	0.0729611	0.66823	0	0.668336	0.0117768	0.236287
Staphylococcus	0.0642496	0.0853233	0.146307	0.395365	0.839096	0.072467	0.205472	0.924894	0.913342	0.713838	0.820149	0.00765372	0.894343	0.705774	0.173064	0.543239	0.981655	0.581931	0.815686	0.0250401	0.229983	0.00114084	0.000138764	0.549059	0.249834	0.661802	0.562754	1.54603e-05	9.90866e-05	0.932647	0.0614136	0.603052	3.30278e-05	0.668336	0	0.179891	0.274238
Streptococcus infantis	0.0777212	0.00570462	0.205653	1.76066e-05	0.242579	0.61487	0.0201911	0.000734139	0.932621	0.00445103	0.0001418	0.000109065	0.337961	0.0233316	4.74951e-08	0.00606014	0.0254216	0.887921	2.67125e-05	0.0004798	0.0246507	0.0850083	0.333818	0.0262033	0.0153383	0.154535	0.0947593	0.332143	0.0562682	4.24997e-05	0.0832092	2.71127e-06	0.1278	0.0117768	0.179891	0	1.09847e-06
Other	0.000100197	0.000464678	0.141719	3.93722e-05	0.0116629	0.199058	9.14109e-06	0.00200665	0.172775	9.81101e-05	7.69416e-05	0.00511191	0.113044	0.000694659	2.54599e-07	0.00035461	0.00747444	0.255234	2.38745e-05	0.000606101	0.00891748	0.879987	0.0574554	0.00959837	0.0072417	0.00429072	0.0766374	0.0705691	0.296311	1.82472e-05	0.00756627	0.0707963	0.649814	0.236287	0.274238	1.09847e-06	0
